# Supplementary material
Source: Frontiers journal article supplement (https://www.frontiersin.org/articles/159277)
Supplement: Data_Sheet_1.XLSX [file Data_Sheet_1.XLSX]

## Sheet: 1_LBgluc_All signif_fold>1.7
Shown here is the fold change in gene expression for each mutant when the cells were grown on LB + 1% glucose. Fold change is the ratio in gene expression between CcpA_mutant vs. CcpAwt. All significant genes are shown for each CcpA mutant.
- positive fold change: then [mRNA] of the gene is MORE abundant in the CcpAmut strain than in the CcpAwt strain.
- negative fold change: then [mRNA] of the gene is LESS abundant in the CcpAmut strain, compared to the CcpAwt strain
		DELTAccpA				CcpA-M17R				CcpA-T62H				CcpA-R304W
	Lab_0	Fold			Lab_0	Fold			Lab_0	Fold			Lab_0	Fold
BSU35910	rbsR	50.7601		BSU06560	yerA	9.33109		BSU12000	manR	7.8809		BSU38040	sacA	18.0989
BSU35960	rbsB	48.2043		BSU40340	rocD	7.8404		BSU12010	manP	5.79817		BSU35960	rbsB	15.2486
BSU35930	rbsD	41.2276		BSU28910	ysbA	6.44633		BSU12020	manA	5.0633		BSU35910	rbsR	13.9489
BSU35940	rbsA	40.2489		BSU27770	yrbE	6.27993		BSU17540	ynaF	4.23563		BSU06560	yerA	11.6633
BSU35950	rbsC	24.6987		BSU37780	rocA	5.72573		BSU12030	yjdF	2.52736		BSU35940	rbsA	9.84233
BSU35970	ywsB	19.7576		BSU13340	ykoM	5.47624			pyrAB	2.04013		BSU35930	rbsD	9.77515
BSU38040	sacA	14.6984		BSU36670	csbD	4.57422		BSU12040	yjdG	1.84519		BSU35970	ywsB	9.3372
BSU06560	yerA	14.2008		BSU22730	ndk	4.54628		BSU15500	pyrC	1.84037		BSU37790	rocG	8.849
BSU14390	fruK	14.1003		BSU29140	citZ	4.43752		BSU40140	yydJ	1.78893		BSU40340	rocD	8.02956
BSU03990	mtlD	13.1217		BSU38430	gspA	4.19943		BSU35400	flgL	-1.70348		BSU38030	ywdA	5.69435
BSU40340	rocD	12.9352		BSU35970	ywsB	4.12976		BSU07380	yfmQ	-1.70554		BSU29140	citZ	5.37427
BSU13340	ykoM	12.676		BSU37210	ywjC	4.07926		BSU16000	ylqC	-1.70613		BSU16090	sucC	5.28445
BSU38030	ywdA	11.0664			rocF	3.95376		BSU08480	yfhC	-1.70672		BSU35920	rbsK	5.13667
BSU37790	rocG	10.6305		BSU04400	gsiB	3.9251		BSU38640	yxlH	-1.70952		BSU09290	glpK	5.13023
BSU09290	glpK	10.5296		BSU37790	rocG	3.85359		BSU02350	nagP	-1.71785			odhA	5.10855
BSU37780	rocA	9.36832		BSU07550	yflT	3.84729		BSU29760	ytxJ	-1.72834		BSU37780	rocA	5.07029
BSU03981	mtlA	9.12927		BSU14660	ykzI	3.84567		BSU09530	yhdN	-1.7286		BSU40330	rocE	4.99612
BSU35920	rbsK	8.51824		BSU16090	sucC	3.65224		BSU33320	fhuD	-1.72926		BSU38050	sacP	4.93764
BSU14380	fruR	7.7314		BSU02110	ybyB	3.51944		BSU40550	ppaC	-1.73108		BSU35950	rbsC	4.72536
BSU24990	pstS	7.26101		BSU35310	yvyD	3.47728		BSU08730	perR	-1.74519		BSU28440	sdhA	4.57332
BSU40330	rocE	7.05558		BSU04220	ydaG	3.36529		BSU16100	sucD	-1.74545		BSU19360	odhB	4.50501
	rocF	6.38071		BSU37770	rocB	3.20048		BSU22790	hbs	-1.76364		BSU02140	glpT	4.48764
BSU28910	ysbA	5.7756		BSU40330	rocE	3.17346		BSU38720	yxkO	-1.76879		BSU14390	fruK	4.03481
BSU22730	ndk	5.64645		BSU30650	dps	3.15466		BSU03960	ycnK	-1.77281		BSU09280	glpF	4.00034
BSU08110	sspH	5.35156		BSU04710	rsbV	3.11023		BSU14170	ykuP	-1.78818			rocF	3.8247
BSU22550	qcrB	5.19618		BSU09690	nhaX	3.06832		BSU12350	yjmF	-1.78909		BSU22730	ndk	3.59154
BSU25190	cccA	5.19388		BSU30660	ytkA	3.0078		BSU32110	yumC	-1.79104		BSU04470	dctP	3.54589
BSU14400	fruA	4.79091			ykzA	2.97996			yjbD	-1.80396		BSU28450	sdhC	3.5441
BSU26360	yqaD	4.70322		BSU29780	ytxG	2.92243		BSU40890	rpsR	-1.80815		BSU14380	fruR	3.50954
BSU02140	glpT	4.63099		BSU07800	treP	2.78609		BSU08760	spo0M	-1.81366		BSU13340	ykoM	3.42727
BSU27770	yrbE	4.52146		BSU15100	ylbP	2.75987		BSU02110	ybyB	-1.81367		BSU24990	pstS	3.33154
BSU13510	ykzE	4.36607		BSU16100	sucD	2.75622		BSU21440	bdbB	-1.81379		BSU23560	mleN	3.29206
BSU28450	sdhC	4.35159		BSU19360	odhB	2.62196		BSU19140	yozB	-1.81545		BSU04710	rsbV	3.23852
BSU19360	odhB	4.25464		BSU07810	treA	2.59804		BSU21920	ugtP	-1.81648		BSU28430	sdhB	3.22057
	odhA	4.1963		BSU04740	rsbX	2.58898		BSU37780	rocA	-1.83704		BSU30660	ytkA	3.13849
BSU38050	sacP	4.07463		BSU14130	ykuL	2.55955		BSU29660	rpsD	-1.85945		BSU27770	yrbE	3.12944
BSU17000	kbl	4.05491		BSU38180	ywzA	2.55774		BSU00240	csfB	-1.87185		BSU40060	gntK	3.09034
BSU04730	sigB	4.02743		BSU04720	rsbW	2.54		BSU00080	yaaC	-1.87366		BSU14130	ykuL	3.03373
	spoIIIC	4.02414		BSU29770	ytxH	2.52106		BSU10820	yisQ	-1.89301		BSU16990	tdh	3.03371
BSU16990	tdh	3.95385		BSU05360	ydfC	2.5031		BSU21480	sunA	-1.91335		BSU37770	rocB	2.97328
BSU22540	qcrC	3.86825		BSU33530	yvaA	2.50076		BSU14010	cheV	-1.92167		BSU17990	sspO	2.96155
BSU09280	glpF	3.80996			odhA	2.47246		BSU01500	rpsI	-1.92665		BSU13020	ykgA	2.9523
BSU40060	gntK	3.78611		BSU18000	citB	2.42945		BSU32440	pucK	-1.93561		BSU36870	atpB	2.93029
BSU28750	araN	3.69226		BSU13020	ykgA	2.41662		BSU22960	gudB	-1.95623		BSU23110	resE	2.82125
BSU28430	sdhB	3.67747		BSU20460	yoqZ	2.40411		BSU19550	yodC	-2.01555		BSU28910	ysbA	2.76197
BSU16090	sucC	3.66263		BSU38190	galT	2.38214		BSU01050	rplL	-2.02146		BSU36880	atpI	2.75215
BSU02130	glpQ	3.61233			yqhA	2.26693		BSU12100	yjeA	-2.0299		BSU36810	atpD	2.74304
BSU37770	rocB	3.59315		BSU29120	mdh	2.22686		BSU24970	pstA	-2.11316		BSU38810	msmX	2.67785
BSU36670	csbD	3.57452		BSU38740	cydC	2.21518		BSU37310	fnr	-2.12637		BSU29780	ytxG	2.61918
BSU08100	acoR	3.52182		BSU10410	yhzC	2.2137		BSU27940	rpmA	-2.15424		BSU22550	qcrB	2.61158
BSU14160	ykuO	3.51103		BSU18010	yneN	2.18872		BSU03940	ycnI	-2.16281		BSU26820	yrpD	2.59927
BSU00490	spoVG	3.48741		BSU03050	ldh	2.18371		BSU12940	dppC	-2.19416		BSU26360	yqaD	2.59463
BSU29140	citZ	3.45693		BSU04370	ydaS	2.15728		BSU28850	rplT	-2.25812		BSU36840	atpH	2.58982
BSU31330	yugN	3.44636		BSU29760	ytxJ	2.13407		BSU06860	yezE	-2.31247		BSU23120	resD	2.56966
BSU17990	sspO	3.43886		BSU38610	yxzF	2.11578		BSU22180	ypsB	-2.42578		BSU29700	acuB	2.56661
BSU08810	senS	3.43788		BSU18920	phrK	2.10082			yoeB	-2.65539		BSU03981	mtlA	2.56537
BSU29710	acuC	3.39571		BSU38750	cydB	2.09682		BSU05310	ydeR	-3.95869		BSU14400	fruA	2.53921
BSU26820	yrpD	3.38108		BSU40060	gntK	2.09611		BSU06820	yeeG	-4.65057		BSU13510	ykzE	2.49316
BSU24960	pstBA	3.36905		BSU36720	ywmE	2.09149		BSU05060	lrpB	-11.3248		BSU36820	atpG	2.48105
BSU24970	pstA	3.29658		BSU25190	cccA	2.07458						BSU38430	gspA	2.47465
	yrkG	3.28652		BSU00840	mcsA	2.05594						BSU04730	sigB	2.45138
BSU24950	pstBB	3.25178		BSU29710	acuC	2.04926						BSU17000	kbl	2.4004
BSU29110	phoP	3.22439			ybaL	2.03866						BSU22540	qcrC	2.39346
BSU24650	yqzG	3.20959		BSU31000	yuaI	2.02682						BSU03990	mtlD	2.38426
BSU23890	yqjG	3.05797		BSU24000	bmrU	2.01464						BSU28530	etfB	2.34743
BSU28440	sdhA	3.00565		BSU00850	mcsB	1.98496						BSU24650	yqzG	2.34724
BSU08890	ygaO	2.9949		BSU04190	ydaD	1.96675						BSU28560	lcfA	2.34503
BSU14660	ykzI	2.96015		BSU08490	yfhD	1.9512						BSU29110	phoP	2.33721
BSU38190	galT	2.95827		BSU11850	yjcG	1.95099						BSU29710	acuC	2.32828
BSU10390	yhfW	2.92237		BSU37930	ywdK	1.94654						BSU08810	senS	2.32289
	lacA	2.91021		BSU39250	yxiE	1.93285							ykzA	2.31431
BSU37210	ywjC	2.89217		BSU07880	yfkJ	1.92172						BSU37240	ywiE	2.28677
BSU16100	sucD	2.88935		BSU06140	gutR	1.92034						BSU08100	acoR	2.27604
	ydhM	2.86176			pmi	1.9102						BSU27760	csbX	2.27366
BSU03480	srfAA	2.84563		BSU35180	csbA	1.90719						BSU24000	bmrU	2.24961
BSU13020	ykgA	2.80253		BSU35670	gtaB	1.90537						BSU18010	yneN	2.24819
BSU24800	yqgW	2.77708		BSU37310	fnr	1.88876						BSU17600	xylA	2.24309
BSU23550	mleA	2.7516		BSU05790	ydhK	1.88355						BSU18000	citB	2.22648
BSU36870	atpB	2.72319		BSU06570	yerB	1.88342						BSU30650	dps	2.22449
BSU30660	ytkA	2.69249		BSU29130	icd	1.87443						BSU07550	yflT	2.22424
BSU18010	yneN	2.68278		BSU23560	mleN	1.87022						BSU23140	resB	2.21955
BSU38810	msmX	2.6743		BSU32990	mrgA	1.8677						BSU39740	iolC	2.19076
BSU14130	ykuL	2.58649		BSU14870	ctaA	1.8663						BSU23550	mleA	2.18853
BSU35310	yvyD	2.56648		BSU11430	oppA	1.86367							spoIIIC	2.17995
BSU29100	phoR	2.56283		BSU00520	ctc	1.85384						BSU14660	ykzI	2.17522
BSU35180	csbA	2.55457		BSU06400	yebE	1.84497						BSU04720	rsbW	2.17489
BSU14910	ctaE	2.5467		BSU27220	yrhE	1.83654						BSU28520	etfA	2.17102
BSU28700	ysfE	2.5457		BSU13640	spo0E	1.83349						BSU23150	resA	2.168
BSU39260	bglH	2.543		BSU30020	ytzE	1.82195						BSU23130	resC	2.16401
BSU39250	yxiE	2.53355		BSU31020	yuaF	1.8137							ansB	2.16302
BSU02110	ybyB	2.52061		BSU31610	mrpB	1.80617						BSU02110	ybyB	2.15961
BSU14920	ctaF	2.50147		BSU04430	ydbD	1.80413						BSU36670	csbD	2.15636
BSU35980	ywsA	2.47741		BSU02830	ycdF	1.80392						BSU27220	yrhE	2.15242
BSU04400	gsiB	2.46712		BSU18510	yoxC	1.80312						BSU08890	ygaO	2.14258
	yuiI	2.43253		BSU28170	hemA	1.80116						BSU38190	galT	2.1387
BSU40490	yycA	2.41808		BSU14150	ykuN	1.79686						BSU39410	nupC	2.12685
BSU28710	cstA	2.40597		BSU38760	cydA	1.78878						BSU04220	ydaG	2.12024
	ydhN	2.39928		BSU31330	yugN	1.78475						BSU37210	ywjC	2.11912
	ybaL	2.38386			smf	1.77974						BSU22560	qcrA	2.09873
BSU07650	yflK	2.36527		BSU32060	yuiD	1.77919						BSU36850	atpF	2.08483
BSU02180	ybfE	2.35642			ydhM	1.77246						BSU31330	yugN	2.07141
BSU23560	mleN	2.34981		BSU23550	mleA	1.76576						BSU36800	atpC	2.06948
BSU06570	yerB	2.33497			ywfC	1.7656						BSU35180	csbA	2.06829
	yxiA	2.33275			ytiA	1.76549						BSU36830	atpA	2.06655
	pmi	2.32493		BSU00250	xpaC	1.73646						BSU29690	acuA	2.0467
BSU39740	iolC	2.32485		BSU30930	ytaB	1.73604						BSU26860	yraO	2.04481
BSU17600	xylA	2.31029		BSU22550	qcrB	1.73445						BSU29680	acsA	2.03775
BSU39270	bglP	2.30117		BSU33380	yvgL	1.73329						BSU21450	yolJ	2.0295
BSU04160	mtlR	2.29474		BSU24860	yqgQ	1.73225							ydhP	2.02901
	ydhT	2.29174		BSU39040	yxiS	1.7286						BSU21470	sunT	2.02652
BSU14890	ctaC	2.25041			ykrS	1.72577						BSU16100	sucD	2.02545
BSU30650	dps	2.24081		BSU04380	ydaT	1.71576						BSU28750	araN	2.01649
BSU27760	csbX	2.21648		BSU07850	yfkM	1.71371						BSU25190	cccA	2.01299
BSU29780	ytxG	2.20272		BSU07590	citT	1.70927							ydhS	2.00628
BSU30560	pckA	2.16158		BSU29700	acuB	1.70795						BSU23500	drm	1.98564
BSU29680	acsA	2.13911		BSU36840	atpH	-1.75215						BSU29720	ytxE	1.98481
BSU29500	ytfJ	2.13114		BSU36830	atpA	-1.77624						BSU09690	nhaX	1.97914
BSU28810	abnA	2.12965		BSU36820	atpG	-1.78361						BSU03040	amyE	1.97183
BSU04530	ydbN	2.12455		BSU09300	glpD	-1.79263							fbaB	1.96898
BSU24360	spoIIIAH	2.12421		BSU36860	atpE	-1.83152						BSU30930	ytaB	1.96713
BSU36810	atpD	2.11976		BSU23910	yqjE	-1.85313						BSU29120	mdh	1.96625
BSU36850	atpF	2.11819		BSU36850	atpF	-1.86612						BSU25280	recO	1.95221
BSU22650	trpF	2.11557		BSU03380	yckB	-1.88654						BSU04400	gsiB	1.9504
BSU24560	gcvPA	2.10658			yurP	-1.91115						BSU40070	gntP	1.92733
BSU36880	atpI	2.10378			pyrAB	-1.95513						BSU39400	pdp	1.92671
BSU39340	hutP	2.08281		BSU23370	ypuA	-1.97758							ybaL	1.92392
	ydhS	2.08272		BSU29220	ytsJ	-2.03253						BSU02130	glpQ	1.91104
BSU17710	tatAC	2.07505		BSU15560	pyrE	-2.10104						BSU15100	ylbP	1.88739
	yvfK	2.06054		BSU15540	pyrD	-2.12183						BSU37280	narG	1.88458
BSU07850	yfkM	2.05797											pmi	1.8841
BSU10230	yhfH	2.05685										BSU39050	katE	1.86979
BSU36830	atpA	2.05371										BSU24360	spoIIIAH	1.86661
BSU18000	citB	2.05344										BSU27750	bofC	1.86272
BSU07560	pel	2.04566										BSU02830	ycdF	1.84994
	yhaS	2.03888										BSU37760	rocC	1.84715
BSU29700	acuB	2.03292										BSU22090	kdgT	1.84622
BSU06410	yebG	2.02704										BSU22080	ypwA	1.84021
BSU05360	ydfC	2.02										BSU36790	ywmA	1.82885
BSU36820	atpG	2.01242											punA	1.82308
BSU14150	ykuN	2.01087										BSU04740	rsbX	1.82145
BSU17330	miaA	2.00545										BSU31930	ald	1.82045
BSU36800	atpC	2.00447										BSU03480	srfAA	1.79631
BSU10770	wprA	2.00226										BSU20480	yoqX	1.7906
BSU04000	ycsA	1.97959										BSU37930	ywdK	1.78557
BSU29770	ytxH	1.97883										BSU22110	kdgK	1.77974
BSU09630	yhdX	1.97102										BSU01310	rplF	1.76516
	fbaB	1.95757										BSU07850	yfkM	1.75933
BSU38570	licA	1.95644										BSU39760	mmsA	1.75905
BSU05950	ydiF	1.95288										BSU38160	qoxB	1.75843
BSU28720	abfA	1.95272											yfiD	1.7519
BSU33380	yvgL	1.94918										BSU07810	treA	1.74646
BSU24780	yqgY	1.93846										BSU14600	pdhC	1.74628
BSU03490	srfAB	1.93635										BSU08110	sspH	1.74571
BSU18220	yngF	1.90321										BSU26610	yrkA	1.73901
BSU03510	srfAC	1.90066											ysiA	1.73754
BSU14600	pdhC	1.89431											yqhA	1.73678
BSU13490	ykrL	1.88578										BSU06570	yerB	1.73519
BSU06960	yesN	1.88478											yuxI	1.73362
BSU14900	ctaD	1.88228										BSU28170	hemA	1.72848
BSU36860	atpE	1.87658										BSU24560	gcvPA	1.72537
BSU20340	yorL	1.87465										BSU28150	hemC	1.72407
BSU14140	ccpC	1.86442										BSU21460	bdbA	1.71956
BSU28560	lcfA	1.86081										BSU19310	dhaS	1.70713
BSU29120	mdh	1.85477										BSU14590	pdhB	1.7054
BSU22580	ypiB	1.83599											yhfD	1.70538
BSU36840	atpH	1.83471											yvsH	-1.70406
BSU31190	yulD	1.83458											rpmGB	-1.70462
BSU14170	ykuP	1.83202										BSU01580	ybaR	-1.7057
BSU14610	pdhD	1.82481										BSU04230	ydaH	-1.70882
BSU12800	xhlB	1.82005										BSU15080	rpmF	-1.71264
BSU06020	groES	1.8198										BSU09000	yhbJ	-1.71316
BSU28520	etfA	1.80536										BSU00080	yaaC	-1.71461
BSU12710	xkdR	1.79446										BSU28250	leuD	-1.71729
BSU39400	pdp	1.79343										BSU27540	yrvM	-1.72429
	gltB	1.78841										BSU05690	ydhB	-1.73778
BSU03500	comS	1.7831										BSU15820	rpmB	-1.74528
BSU10730	yisI	1.78224										BSU32110	yumC	-1.74874
BSU10870	yisU	1.77227										BSU33650	yvzC	-1.75631
BSU04100	kipR	1.7703										BSU22600	aroE	-1.75649
BSU14870	ctaA	1.75607										BSU04020	yczH	-1.76404
BSU24860	yqgQ	1.75593											ylaG	-1.77329
	yrhA	1.74982										BSU23830	yqjL	-1.79259
BSU27210	yrhF	1.74046										BSU05570	ydgB	-1.79289
BSU13810	ykvS	1.73993										BSU25550	rpsT	-1.79386
BSU40070	gntP	1.73874										BSU12190	yjhB	-1.80258
BSU25150	yqfQ	1.73131										BSU00370	abrB	-1.80392
BSU12520	xkdB	1.72693										BSU01440	rplQ	-1.80515
BSU38560	licH	1.70918										BSU00630	yabR	-1.81041
BSU14590	pdhB	1.70094										BSU14010	cheV	-1.81932
BSU09660	yheN	-1.70988										BSU31580	maeN	-1.82217
	ytmQ	-1.81126										BSU05620	ydgF	-1.83589
BSU29460	moaB	-1.85379										BSU09020	yhcB	-1.83645
BSU08990	yhbI	-1.92918										BSU27940	rpmA	-1.83955
BSU32260	hom	-1.93185										BSU00830	ctsR	-1.84487
BSU15540	pyrD	-1.96036										BSU06380	yebC	-1.84792
BSU16620	ylxQ	-2.02626										BSU24450	efp	-1.84836
BSU28260	leuC	-2.03737										BSU08660	sspE	-1.8532
BSU21620	yokE	-2.05953										BSU02340	gltP	-1.86276
BSU23070	serA	-2.06564										BSU25400	yqeY	-1.86571
BSU24320	nusB	-2.10019										BSU16680	rpsO	-1.86835
BSU22690	aroH	-2.12356										BSU14420	ykoA	-1.87278
BSU39230	wapA	-2.18237										BSU36030	ywrK	-1.8792
BSU39220	yxxG	-2.2277										BSU35400	flgL	-1.88088
BSU13960	ykwC	-2.22934										BSU32790	yusG	-1.88354
	yurP	-2.27335										BSU33600	smpB	-1.88357
BSU17700	cotC	-2.29799											yccG	-1.90016
BSU32250	thrC	-2.38918										BSU07970	yfjT	-1.90825
	pta	-2.48115										BSU02960	yceJ	-1.91294
BSU03000	opuAC	-2.56518										BSU11340	fabF	-1.9146
BSU29220	ytsJ	-2.58515										BSU09100	cspB	-1.91927
BSU29740	ccpA	-2.8827										BSU32120	yuzG	-1.92312
BSU36000	alsD	-2.92451										BSU32290	yutF	-1.92554
BSU28290	ilvC	-3.19683										BSU32040	yuiF	-1.92761
BSU32090	yuiA	-3.34211										BSU38640	yxlH	-1.94262
BSU28300	ilvH	-3.91665										BSU40100	ahpF	-1.94645
BSU29470	ackA	-4.34903										BSU16520	frr	-1.96489
												BSU00690	ftsH	-1.9933
												BSU08730	perR	-2.01423
												BSU40550	ppaC	-2.02904
												BSU01050	rplL	-2.03313
												BSU29660	rpsD	-2.04457
												BSU09660	yheN	-2.05793
												BSU05120	cspC	-2.0924
												BSU19620	yodJ	-2.11842
													yurP	-2.14576
												BSU32440	pucK	-2.23795
												BSU03000	opuAC	-2.24808
												BSU28850	rplT	-2.32257
												BSU23370	ypuA	-2.34935
												BSU01500	rpsI	-2.39083
												BSU04360	mntH	-2.50674
												BSU40890	rpsR	-2.62634
												BSU22180	ypsB	-2.74342
												BSU05310	ydeR	-3.05247

## Sheet: 2_LBgluc_Venn_diagram_fold>1.7
VENNdiagram (figure 2A in main tekst). To represent differences/similarities between the mutants when the strains were grown on LB + 1% glucose.
All significant genes per mutant are uploaded to the venny webtool. http://bioinfogp.cnb.csic.es/tools/venny/
	Figure 2A in main tekst																	this figure is not in main text
								52.7132	% of the genes that are affected by CcpA-M17R that differ from the DELTAccpA
															TOTAL:
93	12	0	2	3	0	46	60	47	3	0	18	35	16	91	426			LB+1%glucose_20140327b					LB_20140605					244	182	184
Elements only in "DELTAccpA":	Common elements in "DELTAccpA" and "M17R":	Common elements in "DELTAccpA", "M17R" and "T62H":	Common elements in "DELTAccpA" and "T62H":	Common elements in "DELTAccpA", "M17R", "T62H" and "R304W":	Common elements in "DELTAccpA", "T62H" and "R304W":	Common elements in "DELTAccpA", "M17R" and "R304W":	Common elements in "DELTAccpA" and "R304W":	Elements only in "M17R":	Common elements in "M17R" and "T62H":	Common elements in "M17R", "T62H" and "R304W":	Common elements in "M17R" and "R304W":	Elements only in "T62H":	Common elements in "T62H" and "R304W":	Elements only in "R304W":				paste here: all groups from the VENN diagram					paste here: all groups from the VENN diagram					Elements only in "LB 1%gluc":	Common elements in "LB 1%gluc" and "LB":	Elements only in "LB":
ykuO	ydhM		pstA	rocA		ywsB	rbsR	treP	ytxJ		gspA	manR	flgL	dctP				ALL significant on LB+1%glucose. TOTAL 426					ALL significant on LB. TOTAL 366					pstBA	ykuO	spoVS
spoVG	yvyD		ykuP	sucD		yerA	rbsB	ywzA	fnr		yflT	manP	yxlH	resE				ykuO	BSU14160	ykuO			ydbN	BSU04530	ydbN			yrkG	spoVG	fabD
pstBA	yxiE			ybyB		rocD	rbsD	yvaA	pyrAB		ydaG	manA	ppaC	resD				spoVG	BSU00490	spoVG			pstS	BSU24990	pstS			pstBB	yhfW	hemH
yrkG	ydfC					ykoM	rbsA	yoqZ			rsbV	ynaF	perR	etfB				pstBA	BSU24960	pstBA			yvyD	BSU35310	yvyD			yqjG	lacA	yhdO
pstBB	ykuN					rocG	rbsC	cydC			nhaX	yjdF	yumC	ywiE				yrkG		yrkG			yfmQ	BSU07380	yfmQ			yqgW	ysfE	ysfD
yqjG	ytxH					rocE	sacA	yhzC			ykzA	yjdG	rpsR	resB				pstBB	BSU24950	pstBB			srfAB	BSU03490	srfAB			phoR	bglH	ysfC
yhfW	yvgL					rocF	fruK	ldh			ylbP	pyrC	rpsD	resA				yqjG	BSU23890	yqjG			resA	BSU23150	resA			ctaE	ywsA	ydeB
lacA	atpE					ysbA	mtlD	ydaS			treA	yydJ	yaaC	resC				yhfW	BSU10390	yhfW			cydA	BSU38760	cydA			ctaF	cstA	ynfC
yqgW	ctaA					ndk	ywdA	yxzF			rsbX	yfmQ	cheV	ansB				lacA		lacA			comS	BSU03500	comS			yuiI	ydhN	yerC
phoR	yqgQ					qcrB	glpK	phrK			rsbW	ylqC	rpsI	nupC				yqgW	BSU24800	yqgW			srfAC	BSU03510	srfAC			yycA	bglP	yfhO
ctaE	pyrD					cccA	mtlA	cydB			yqhA	yfhC	pucK	qcrA				phoR	BSU29100	phoR			hutP	BSU39340	hutP			yflK	mtlR	murAA
ysfE	ytsJ					yrbE	rbsK	ywmE			bmrU	nagP	rplL	acuA				ctaE	BSU14910	ctaE			ctaA	BSU14870	ctaA			ybfE	ydhT	ypjD
bglH						odhB	fruR	mcsA			ywdK	yhdN	rpmA	yraO				ysfE	BSU28700	ysfE			spoVS	BSU16980	spoVS			yxiA	ydbN	ykfC
ctaF						odhA	pstS	yuaI			yrhE	fhuD	rplT	yolJ				bglH	BSU39260	bglH			spoVG	BSU00490	spoVG			ctaC	hutP	pbpX
ywsA						gntK	sspH	mcsB			ycdF	hbs	ypsB	ydhP				ctaF	BSU14920	ctaF			fabD	BSU15900	fabD			pckA	pel	msmE
yuiI						sucC	fruA	ydaD			hemA	yxkO	ydeR	sunT				ywsA	BSU35980	ywsA			hemH	BSU10130	hemH			ytfJ	yhaS	yxzC
yycA						rocB	yqaD	yfhD			ytaB	ycnK		drm				yuiI		yuiI			yhdO		yhdO			abnA	ycsA	yqeG
cstA						csbD	glpT	yjcG			ypuA	yjmF		ytxE				yycA	BSU40490	yycA			ysfD		ysfD			trpF	licA	yaaO
ydhN						citZ	ykzE	yfkJ				yjbD		amyE				cstA	BSU28710	cstA			ysfC		ysfC			tatAC	abfA	ftsE
yflK						yugN	sdhC	gutR				spo0M		recO				ydhN		ydhN			ydeB	BSU05130	ydeB			yvfK	srfAB	cggR
ybfE						acuC	sacP	gtaB				bdbB		narG				yflK	BSU07650	yflK			oppA	BSU11430	oppA			yhfH	srfAC	msmR
yxiA						ykzI	kbl	ydhK				yozB		katE				ybfE	BSU02180	ybfE			ynfC	BSU18110	ynfC			yebG	yesN	pyrR
bglP						galT	sigB	icd				ugtP		bofC				yxiA		yxiA			yerC	BSU06580	yerC			miaA	ctaD	licB
mtlR						ywjC	spoIIIC	mrgA				csfB		rocC				bglP	BSU39270	bglP			yfhO	BSU08610	yfhO			wprA	ccpC	licC
ydhT						ykgA	tdh	oppA				yisQ		kdgT				mtlR	BSU04160	mtlR			murAA	BSU36760	murAA			yhdX	yulD	ansA
ctaC						mleA	qcrC	ctc				sunA		ypwA				ydhT		ydhT			ypjD	BSU22500	ypjD			ydiF	xhlB	yyzE
pckA						ytkA	glpF	yebE				gudB		ywmA				ctaC	BSU14890	ctaC			ykfC	BSU12990	ykfC			yqgY	comS	bglA
ytfJ						yneN	araN	spo0E				yodC		punA				pckA	BSU30560	pckA			pbpX	BSU16950	pbpX			yngF	kipR	ykrT
abnA						ykuL	sdhB	ytzE				yjeA		ald				ytfJ	BSU29500	ytfJ			msmE	BSU30270	msmE			ykrL	licH	tpiA
ydbN						csbA	glpQ	yuaF				ycnI		yoqX				abnA	BSU28810	abnA			yxzC	BSU39200	yxzC			yorL	wapA	yvfV
trpF						gsiB	acoR	mrpB				dppC		kdgK				ydbN	BSU04530	ydbN			yqeG	BSU25680	yqeG			ypiB	yxxG	rpsK
hutP						ybaL	sspO	ydbD				yezE		rplF				trpF	BSU22650	trpF			wapA	BSU39230	wapA			pdhD	pta	glyQ
tatAC						mleN	senS	yoxC				yoeB		mmsA				hutP	BSU39340	hutP			yxxG	BSU39220	yxxG			groES	ccpA	pgm
yvfK						yerB	yrpD	cydA				yeeG		qoxB				tatAC	BSU17710	tatAC			yaaO	BSU00270	yaaO			xkdR	alsD	pgk
yhfH						pmi	phoP	smf				lrpB		yfiD				yvfK		yvfK			ftsE	BSU35260	ftsE			gltB	ilvH	fliM
pel						dps	yqzG	yuiD						yrkA				yhfH	BSU10230	yhfH			ackA	BSU29470	ackA			yisI	ackA	ylbQ
yhaS						ytxG	sdhA	ywfC						ysiA				pel	BSU07560	pel			ccpA	BSU29740	ccpA			yisU	ydhM	yvzB
yebG						atpF	ygaO	ytiA						yuxI				yhaS		yhaS			mtlA	BSU03981	mtlA			yrhA	yvyD	pgi
miaA						yfkM	srfAA	xpaC						hemC				yebG	BSU06410	yebG			srfAA	BSU03480	srfAA			yrhF	yxiE	rplE
wprA						atpA	atpB	yxiS						bdbA				miaA	BSU17330	miaA			cggR	BSU33950	cggR			ykvS	ykuN	rpsS
ycsA						citB	msmX	ykrS						dhaS				wprA	BSU10770	wprA			ldh	BSU03050	ldh			yqfQ	ctaA	oppD
yhdX						acuB	iolC	ydaT						yhfD				ycsA	BSU04000	ycsA			rbsK	BSU35920	rbsK			xkdB	rocA	lytB
licA						atpG	xylA	citT						yvsH				yhdX	BSU09630	yhdX			msmR	BSU30260	msmR			ytmQ	sucD	yaaD
ydiF						mdh	csbX	glpD						rpmGB				licA	BSU38570	licA			licA	BSU38570	licA			moaB	ybyB	ydjM
abfA						atpH	acsA	yqjE						ybaR				ydiF	BSU05950	ydiF			licH	BSU38560	licH			yhbI	ywsB	yddT
yqgY						yurP	spoIIIAH	yckB						ydaH				abfA	BSU28720	abfA			glpD	BSU09300	glpD			hom	yerA	yybN
srfAB							atpD	pyrE						rpmF				yqgY	BSU24780	yqgY			sunA	BSU21480	sunA			ylxQ	rocD	dacA
yngF							gcvPA							yhbJ				srfAB	BSU03490	srfAB			dctP	BSU04470	dctP			leuC	ykoM	glpP
srfAC							atpI							leuD				yngF	BSU18220	yngF			ykzI	BSU14660	ykzI			yokE	rocG	feuA
ykrL							ydhS							yrvM				srfAC	BSU03510	srfAC			pyrR	BSU15470	pyrR			serA	rocE	ydfF
yesN							atpC							ydhB				ykrL	BSU13490	ykrL			licB	BSU38590	licB			nusB	rocF	yaaN
ctaD							fbaB							rpmB				yesN	BSU06960	yesN			bglH	BSU39260	bglH			aroH	ysbA	flgE
yorL							pdhC							yvzC				ctaD	BSU14900	ctaD			treP	BSU07800	treP			ykwC	ndk	pstC
ccpC							lcfA							aroE				yorL	BSU20340	yorL			bglP	BSU39270	bglP			cotC	qcrB	yisY
ypiB							etfA							yczH				ccpC	BSU14140	ccpC			treA	BSU07810	treA			thrC	cccA	yezB
yulD							pdp							ylaG				ypiB	BSU22580	ypiB			gntK	BSU40060	gntK			ilvC	yrbE	yfkC
pdhD							gntP							yqjL				yulD	BSU31190	yulD			licC	BSU38580	licC			yuiA	odhB	purQ
xhlB							pdhB							ydgB				pdhD	BSU14610	pdhD			ansA	BSU23580	ansA			ydfC	odhA	yhfC
groES							yheN							rpsT				xhlB	BSU12800	xhlB			rocA	BSU37780	rocA			ytxH	gntK	gltC
xkdR							opuAC							yjhB				groES	BSU06020	groES			rbsD	BSU35930	rbsD			yvgL	sucC	ykoL
gltB														abrB				xkdR	BSU12710	xkdR			rbsA	BSU35940	rbsA			atpE	rocB	yomL
comS														rplQ				gltB		gltB			rbsB	BSU35960	rbsB			yqgQ	csbD	ydcS
yisI														yabR				comS	BSU03500	comS			rbsR	BSU35910	rbsR			pyrD	citZ	hag
yisU														maeN				yisI	BSU10730	yisI			yerA	BSU06560	yerA			ytsJ	yugN	ywnJ
kipR														ydgF				yisU	BSU10870	yisU			yyzE	BSU40120	yyzE			pstA	acuC	ywjB
yrhA														yhcB				kipR	BSU04100	kipR			bglA	BSU40110	bglA			ykuP	ykzI	ywqI
yrhF														ctsR				yrhA		yrhA			manA	BSU12020	manA			ykgA	galT	csbC
ykvS														yebC				yrhF	BSU27210	yrhF			yjdF	BSU12030	yjdF			gsiB	ywjC	yxaI
yqfQ														efp				ykvS	BSU13810	ykvS			ywsB	BSU35970	ywsB			ybaL	mleA	yvdI
xkdB														sspE				yqfQ	BSU25150	yqfQ			rbsC	BSU35950	rbsC			yerB	ytkA	yxnA
licH														gltP				xkdB	BSU12520	xkdB			ykoM	BSU13340	ykoM			dps	yneN	yqhB
ytmQ														yqeY				licH	BSU38560	licH			sucD	BSU16100	sucD			ytxG	ykuL	dra
moaB														rpsO				ytmQ		ytmQ			cccA	BSU25190	cccA			atpF	csbA	melA
yhbI														ykoA				moaB	BSU29460	moaB			ytkA	BSU30660	ytkA			yfkM	mleN	treR
hom														ywrK				yhbI	BSU08990	yhbI			maeN	BSU31580	maeN			atpA	pmi	ysbB
ylxQ														yusG				hom	BSU32260	hom			rocF		rocF			atpG	citB	acoA
leuC														smpB				ylxQ	BSU16620	ylxQ			rocD	BSU40340	rocD			atpH	acuB	yvdR
yokE														yccG				leuC	BSU28260	leuC			rocG	BSU37790	rocG			fruK	mdh	rpsC
serA														yfjT				yokE	BSU21620	yokE			citB	BSU18000	citB			fruR	yurP	yhaP
nusB														yceJ				serA	BSU23070	serA			manR	BSU12000	manR			fruA	rbsR	yobB
aroH														fabF				nusB	BSU24320	nusB			manP	BSU12010	manP			sdhC	rbsB	gntZ
wapA														cspB				aroH	BSU22690	aroH			mtlD	BSU03990	mtlD			sigB	rbsD	araL
yxxG														yuzG				wapA	BSU39230	wapA			yoeB		yoeB			spoIIIC	rbsA	yhaT
ykwC														yutF				yxxG	BSU39220	yxxG			yneN	BSU18010	yneN			araN	rbsC	yosB
cotC														yuiF				ykwC	BSU13960	ykwC			phoP	BSU29110	phoP			atpB	sacA	malL
thrC														ahpF				cotC	BSU17700	cotC			ykuO	BSU14160	ykuO			xylA	mtlD	xkdK
pta														frr				thrC	BSU32250	thrC			qcrA	BSU22560	qcrA			atpD	ywdA	kdgA
ccpA														ftsH				pta		pta			tdh	BSU16990	tdh			gcvPA	glpK	xepA
alsD														cspC				ccpA	BSU29740	ccpA			ylbP	BSU15100	ylbP			atpI	mtlA	yocF
ilvC														yodJ				alsD	BSU36000	alsD			yrpD	BSU26820	yrpD			atpC	rbsK	xtmB
yuiA														mntH				ilvC	BSU28290	ilvC			ykrT		ykrT			pdhB	pstS	yvfM
ilvH																		yuiA	BSU32090	yuiA			mdh	BSU29120	mdh			yheN	sspH	xkdN
ackA																		ilvH	BSU28300	ilvH			tpiA	BSU33920	tpiA			opuAC	yqaD	yosJ
																		ackA	BSU29470	ackA			yvfV	BSU34050	yvfV			ywzA	glpT	yvfL
																		ydhM		ydhM			icd	BSU29130	icd			yvaA	ykzE	yesM
																		yvyD	BSU35310	yvyD			rpsK	BSU01420	rpsK			yoqZ	sacP	yxjC
																		yxiE	BSU39250	yxiE			glyQ	BSU25270	glyQ			cydC	kbl	yoqF
																		ydfC	BSU05360	ydfC			pgm	BSU33910	pgm			yhzC	tdh	yocG
																		ykuN	BSU14150	ykuN			pgk	BSU33930	pgk			ydaS	qcrC	yqcK
																		ytxH	BSU29770	ytxH			fliM	BSU16310	fliM			yxzF	glpF	xkdT
																		yvgL	BSU33380	yvgL			ylbQ	BSU15110	ylbQ			phrK	sdhB	xkdV
																		atpE	BSU36860	atpE			yvzB	BSU35150	yvzB			cydB	glpQ	fabHB
																		ctaA	BSU14870	ctaA			hemC	BSU28150	hemC			ywmE	acoR	yxeI
																		yqgQ	BSU24860	yqgQ			pgi	BSU31350	pgi			mcsA	sspO	yoqS
																		pyrD	BSU15540	pyrD			ykrS		ykrS			yuaI	senS	yomZ
																		ytsJ	BSU29220	ytsJ			rplE	BSU01280	rplE			mcsB	yrpD	hxlA
																		pstA	BSU24970	pstA			rpsS	BSU01200	rpsS			ydaD	phoP	sacB
																		ykuP	BSU14170	ykuP			pdhC	BSU14600	pdhC			yjcG	yqzG	yfiH
																		rocA	BSU37780	rocA			rplF	BSU01310	rplF			yfkJ	sdhA	yqkK
																		sucD	BSU16100	sucD			oppD	BSU11460	oppD			gutR	ygaO	xsa
																		ybyB	BSU02110	ybyB			lytB	BSU35630	lytB			gtaB	srfAA	yfmN
																		ywsB	BSU35970	ywsB			yaaD	BSU00110	yaaD			ydhK	msmX	ypzC
																		yerA	BSU06560	yerA			ydjM	BSU06250	ydjM			mrgA	iolC	yosD
																		rocD	BSU40340	rocD			cspB	BSU09100	cspB			ctc	csbX	xkdX
																		ykoM	BSU13340	ykoM			yddT	BSU05100	yddT			yebE	acsA	hutH
																		rocG	BSU37790	rocG			yybN	BSU40580	yybN			spo0E	spoIIIAH	yteQ
																		rocE	BSU40330	rocE			dacA	BSU00100	dacA			ytzE	ydhS	yomT
																		rocF		rocF			glpP	BSU09270	glpP			yuaF	fbaB	dctB
																		ysbA	BSU28910	ysbA			feuA	BSU01630	feuA			mrpB	pdhC	yopY
																		ndk	BSU22730	ndk			ydfF	BSU05390	ydfF			ydbD	lcfA	tyrZ
																		qcrB	BSU22550	qcrB			yaaN	BSU00260	yaaN			smf	etfA	citM
																		cccA	BSU25190	cccA			flgE		flgE			yuiD	pdp	araD
																		yrbE	BSU27770	yrbE			pstC	BSU24980	pstC			ywfC	gntP	yonE
																		odhB	BSU19360	odhB			citZ	BSU29140	citZ			xpaC	treP	ytlI
																		odhA		odhA			yisY	BSU10900	yisY			yxiS	ldh	ycbO
																		gntK	BSU40060	gntK			yezB		yezB			ydaT	yfhD	yonK
																		sucC	BSU16090	sucC			sucC	BSU16090	sucC			citT	icd	yvdJ
																		rocB	BSU37770	rocB			yfkC	BSU07940	yfkC			yqjE	oppA	yveN
																		csbD	BSU36670	csbD			glpK	BSU09290	glpK			yckB	yoxC	ywdC
																		citZ	BSU29140	citZ			ywdA	BSU38030	ywdA			pyrE	cydA	yukJ
																		yugN	BSU31330	yugN			glpQ	BSU02130	glpQ			fnr	ytiA	phrC
																		acuC	BSU29710	acuC			rocE	BSU40330	rocE			pyrAB	ykrS	dctR
																		ykzI	BSU14660	ykzI			purQ	BSU06470	purQ			bmrU	glpD	yhaX
																		galT	BSU38190	galT			ilvH	BSU28300	ilvH			ywdK	ytxJ	xkdO
																		ywjC	BSU37210	ywjC			yhfC	BSU10180	yhfC			yrhE	gspA	yvcA
																		ykgA	BSU13020	ykgA			gltC	BSU18460	gltC			ycdF	yflT	yjdB
																		mleA	BSU23550	mleA			ykoL	BSU13330	ykoL			hemA	ydaG	yonH
																		ytkA	BSU30660	ytkA			yomL	BSU21320	yomL			ytaB	rsbV	xkdW
																		yneN	BSU18010	yneN			ydcS	BSU04880	ydcS			ypuA	nhaX	yfiE
																		ykuL	BSU14130	ykuL			hag	BSU35360	hag			ynaF	ykzA	xkdH
																		csbA	BSU35180	csbA			ywnJ	BSU36540	ywnJ			yjdG	ylbP	yugM
																		gsiB	BSU04400	gsiB			ydhT		ydhT			pyrC	treA	ycgB
																		ybaL		ybaL			ywjB	BSU37220	ywjB			yydJ	rsbX	ytcP
																		mleN	BSU23560	mleN			ywqI	BSU36200	ywqI			ylqC	rsbW	yesL
																		yerB	BSU06570	yerB			ytxJ	BSU29760	ytxJ			yhdN	yqhA	ypiF
																		pmi		pmi			yfhD	BSU08490	yfhD			fhuD	manR	iolH
																		dps	BSU30650	dps			csbC	BSU39810	csbC			hbs	manP	ycbR
																		ytxG	BSU29780	ytxG			yoxC	BSU18510	yoxC			yxkO	manA	yisK
																		atpF	BSU36850	atpF			ywiE	BSU37240	ywiE			ycnK	yjdF	yrhP
																		yfkM	BSU07850	yfkM			yxaI	BSU39960	yxaI			yjmF	yfmQ	iolI
																		atpA	BSU36830	atpA			yvdI		yvdI			spo0M	yfhC	araB
																		citB	BSU18000	citB			mleA	BSU23550	mleA			yozB	nagP	ydzA
																		acuB	BSU29700	acuB			yxnA	BSU40000	yxnA			ugtP	yjbD	spoIIIAC
																		atpG	BSU36820	atpG			etfB	BSU28530	etfB			csfB	bdbB	leuS
																		mdh	BSU29120	mdh			csbD	BSU36670	csbD			yisQ	sunA	yvgW
																		atpH	BSU36840	atpH			etfA	BSU28520	etfA			gudB	yodC	yckE
																		yurP		yurP			csbA	BSU35180	csbA			ycnI	yjeA	ssb
																		rbsR	BSU35910	rbsR			yqhB	BSU24750	yqhB			dppC	yoeB	yhcA
																		rbsB	BSU35960	rbsB			mleN	BSU23560	mleN			yezE	dctP	yurO
																		rbsD	BSU35930	rbsD			bdbB	BSU21440	bdbB			yeeG	etfB	opuE
																		rbsA	BSU35940	rbsA			dra		dra			lrpB	ywiE	ycxC
																		rbsC	BSU35950	rbsC			ydhM		ydhM			flgL	resA	ybcM
																		sacA	BSU38040	sacA			melA	BSU30300	melA			yxlH	nupC	leuB
																		fruK	BSU14390	fruK			nhaX	BSU09690	nhaX			ppaC	qcrA	nin
																		mtlD	BSU03990	mtlD			gntP	BSU40070	gntP			perR	acuA	alsS
																		ywdA	BSU38030	ywdA			nagP	BSU07700	nagP			yumC	yraO	yitJ
																		glpK	BSU09290	glpK			yflT	BSU07550	yflT			rpsR	yolJ	yqaS
																		mtlA	BSU03981	mtlA			yolJ	BSU21450	yolJ			rpsD	sunT	ybcH
																		rbsK	BSU35920	rbsK			ytiA		ytiA			yaaC	amyE	yezD
																		fruR	BSU14380	fruR			sdhB	BSU28430	sdhB			cheV	bofC	ybcD
																		pstS	BSU24990	pstS			sunT	BSU21470	sunT			rpsI	rocC	yutK
																		sspH	BSU08110	sspH			treR	BSU07820	treR			pucK	kdgT	yqbM
																		fruA	BSU14400	fruA			galT	BSU38190	galT			rplL	ywmA	ydjE
																		yqaD	BSU26360	yqaD			yqhA		yqhA			rpmA	kdgK	yhcC
																		glpT	BSU02140	glpT			odhB	BSU19360	odhB			rplT	rplF	yhjB
																		ykzE	BSU13510	ykzE			rsbX	BSU04740	rsbX			ypsB	yfiD	coxA
																		sdhC	BSU28450	sdhC			sdhA	BSU28440	sdhA			ydeR	yuxI	sigE
																		sacP	BSU38050	sacP			rsbW	BSU04720	rsbW			resE	hemC	yocN
																		kbl	BSU17000	kbl			ysbB	BSU28900	ysbB			resD	bdbA	cotV
																		sigB	BSU04730	sigB			odhA		odhA			resB	maeN	cgeA
																		spoIIIC		spoIIIC			nupC	BSU39410	nupC			resC	yhcB	cwlD
																		tdh	BSU16990	tdh			ybyB	BSU02110	ybyB			ansB	cspB	spoVAA
																		qcrC	BSU22540	qcrC			bdbA	BSU21460	bdbA			ydhP		ydfR
																		glpF	BSU09280	glpF			glpF	BSU09280	glpF			drm		yesS
																		araN	BSU28750	araN			acoA	BSU08060	acoA			ytxE
																		sdhB	BSU28430	sdhB			ndk	BSU22730	ndk			recO
																		glpQ	BSU02130	glpQ			ydaG	BSU04220	ydaG			narG
																		acoR	BSU08100	acoR			ywjC	BSU37210	ywjC			katE
																		sspO	BSU17990	sspO			rsbV	BSU04710	rsbV			ypwA
																		senS	BSU08810	senS			ysbA	BSU28910	ysbA			punA
																		yrpD	BSU26820	yrpD			gspA	BSU38430	gspA			ald
																		phoP	BSU29110	phoP			pdp	BSU39400	pdp			yoqX
																		yqzG	BSU24650	yqzG			yvdR	BSU34500	yvdR			mmsA
																		sdhA	BSU28440	sdhA			kipR	BSU04100	kipR			qoxB
																		ygaO	BSU08890	ygaO			yxiE	BSU39250	yxiE			yrkA
																		srfAA	BSU03480	srfAA			rpsC	BSU01220	rpsC			ysiA
																		atpB	BSU36870	atpB			yhaP		yhaP			dhaS
																		msmX	BSU38810	msmX			yobB	BSU18820	yobB			yhfD
																		iolC	BSU39740	iolC			alsD	BSU36000	alsD			yvsH
																		xylA	BSU17600	xylA			pmi		pmi			rpmGB
																		csbX	BSU27760	csbX			acuB	BSU29700	acuB			ybaR
																		acsA	BSU29680	acsA			acuC	BSU29710	acuC			ydaH
																		spoIIIAH	BSU24360	spoIIIAH			ysfE	BSU28700	ysfE			rpmF
																		atpD	BSU36810	atpD			acuA	BSU29690	acuA			yhbJ
																		gcvPA	BSU24560	gcvPA			acoR	BSU08100	acoR			leuD
																		atpI	BSU36880	atpI			sspH	BSU08110	sspH			yrvM
																		ydhS		ydhS			sacP	BSU38050	sacP			ydhB
																		atpC	BSU36800	atpC			gntZ	BSU40080	gntZ			rpmB
																		fbaB		fbaB			ccpC	BSU14140	ccpC			yvzC
																		pdhC	BSU14600	pdhC			araL	BSU28770	araL			aroE
																		lcfA	BSU28560	lcfA			ykuL	BSU14130	ykuL			yczH
																		etfA	BSU28520	etfA			yrbE	BSU27770	yrbE			ylaG
																		pdp	BSU39400	pdp			bofC	BSU27750	bofC			yqjL
																		gntP	BSU40070	gntP			msmX	BSU38810	msmX			ydgB
																		pdhB	BSU14590	pdhB			sacA	BSU38040	sacA			rpsT
																		yheN	BSU09660	yheN			yhaT		yhaT			yjhB
																		opuAC	BSU03000	opuAC			glpT	BSU02140	glpT			abrB
																		treP	BSU07800	treP			rocB	BSU37770	rocB			rplQ
																		ywzA	BSU38180	ywzA			kbl	BSU17000	kbl			yabR
																		yvaA	BSU33530	yvaA			yosB	BSU20180	yosB			ydgF
																		yoqZ	BSU20460	yoqZ			malL	BSU34560	malL			ctsR
																		cydC	BSU38740	cydC			xkdK	BSU12650	xkdK			yebC
																		yhzC	BSU10410	yhzC			xhlB	BSU12800	xhlB			efp
																		ldh	BSU03050	ldh			kdgA	BSU22100	kdgA			sspE
																		ydaS	BSU04370	ydaS			csbX	BSU27760	csbX			gltP
																		yxzF	BSU38610	yxzF			xepA	BSU12780	xepA			yqeY
																		phrK	BSU18920	phrK			yocF		yocF			rpsO
																		cydB	BSU38750	cydB			acsA	BSU29680	acsA			ykoA
																		ywmE	BSU36720	ywmE			xtmB	BSU12580	xtmB			ywrK
																		mcsA	BSU00840	mcsA			yvfM		yvfM			yusG
																		yuaI	BSU31000	yuaI			sspO	BSU17990	sspO			smpB
																		mcsB	BSU00850	mcsB			xkdN	BSU12671	xkdN			yccG
																		ydaD	BSU04190	ydaD			yosJ	BSU20100	yosJ			yfjT
																		yfhD	BSU08490	yfhD			qcrB	BSU22550	qcrB			yceJ
																		yjcG	BSU11850	yjcG			yqaD	BSU26360	yqaD			fabF
																		yfkJ	BSU07880	yfkJ			lacA		lacA			yuzG
																		gutR	BSU06140	gutR			qcrC	BSU22540	qcrC			yutF
																		gtaB	BSU35670	gtaB			yvfL		yvfL			yuiF
																		ydhK	BSU05790	ydhK			senS	BSU08810	senS			ahpF
																		icd	BSU29130	icd			yesM	BSU06950	yesM			frr
																		mrgA	BSU32990	mrgA			yxjC	BSU39000	yxjC			ftsH
																		oppA	BSU11430	oppA			yoqF	BSU20650	yoqF			cspC
																		ctc	BSU00520	ctc			yocG		yocG			yodJ
																		yebE	BSU06400	yebE			yqcK	BSU25800	yqcK			mntH
																		spo0E	BSU13640	spo0E			xkdT	BSU12730	xkdT
																		ytzE	BSU30020	ytzE			abfA	BSU28720	abfA
																		yuaF	BSU31020	yuaF			xkdV	BSU12750	xkdV
																		mrpB	BSU31610	mrpB			yesN	BSU06960	yesN
																		ydbD	BSU04430	ydbD			fabHB	BSU10170	fabHB
																		yoxC	BSU18510	yoxC			yxeI	BSU39540	yxeI
																		cydA	BSU38760	cydA			yoqS	BSU20530	yoqS
																		smf		smf			yomZ	BSU21170	yomZ
																		yuiD	BSU32060	yuiD			hxlA	BSU03460	hxlA
																		ywfC		ywfC			sacB	BSU34450	sacB
																		ytiA		ytiA			ydhN		ydhN
																		xpaC	BSU00250	xpaC			yfiH	BSU08270	yfiH
																		yxiS	BSU39040	yxiS			yqkK	BSU23540	yqkK
																		ykrS		ykrS			yraO	BSU26860	yraO
																		ydaT	BSU04380	ydaT			yugN	BSU31330	yugN
																		citT	BSU07590	citT			ywsA	BSU35980	ywsA
																		glpD	BSU09300	glpD			lcfA	BSU28560	lcfA
																		yqjE	BSU23910	yqjE			xsa	BSU28510	xsa
																		yckB	BSU03380	yckB			spoIIIAH	BSU24360	spoIIIAH
																		pyrE	BSU15560	pyrE			yfmN	BSU07410	yfmN
																		ytxJ	BSU29760	ytxJ			ypzC	BSU23320	ypzC
																		fnr	BSU37310	fnr			yosD	BSU20160	yosD
																		pyrAB		pyrAB			xkdX	BSU12770	xkdX
																		gspA	BSU38430	gspA			ykzA		ykzA
																		yflT	BSU07550	yflT			ykuN	BSU14150	ykuN
																		ydaG	BSU04220	ydaG			ykzE	BSU13510	ykzE
																		rsbV	BSU04710	rsbV			ydhS		ydhS
																		nhaX	BSU09690	nhaX			amyE	BSU03040	amyE
																		ykzA		ykzA			hutH	BSU39350	hutH
																		ylbP	BSU15100	ylbP			kdgT	BSU22090	kdgT
																		treA	BSU07810	treA			yteQ		yteQ
																		rsbX	BSU04740	rsbX			ctaD	BSU14900	ctaD
																		rsbW	BSU04720	rsbW			yuxI		yuxI
																		yqhA		yqhA			yomT	BSU21230	yomT
																		bmrU	BSU24000	bmrU			dctB	BSU04440	dctB
																		ywdK	BSU37930	ywdK			yopY	BSU20720	yopY
																		yrhE	BSU27220	yrhE			tyrZ	BSU38460	tyrZ
																		ycdF	BSU02830	ycdF			yqzG	BSU24650	yqzG
																		hemA	BSU28170	hemA			kdgK	BSU22110	kdgK
																		ytaB	BSU30930	ytaB			citM	BSU07610	citM
																		ypuA	BSU23370	ypuA			araD	BSU28780	araD
																		manR	BSU12000	manR			yonE	BSU21120	yonE
																		manP	BSU12010	manP			ytlI	BSU29400	ytlI
																		manA	BSU12020	manA			ycbO	BSU02580	ycbO
																		ynaF	BSU17540	ynaF			yonK	BSU21060	yonK
																		yjdF	BSU12030	yjdF			yvdJ	BSU34580	yvdJ
																		yjdG	BSU12040	yjdG			rocC	BSU37760	rocC
																		pyrC	BSU15500	pyrC			yveN		yveN
																		yydJ	BSU40140	yydJ			ycsA	BSU04000	ycsA
																		yfmQ	BSU07380	yfmQ			ywdC		ywdC
																		ylqC	BSU16000	ylqC			pel	BSU07560	pel
																		yfhC	BSU08480	yfhC			yukJ	BSU31945	yukJ
																		nagP	BSU02350	nagP			phrC	BSU03780	phrC
																		yhdN	BSU09530	yhdN			mtlR	BSU04160	mtlR
																		fhuD	BSU33320	fhuD			dctR	BSU04460	dctR
																		hbs	BSU22790	hbs			yhaX	BSU09830	yhaX
																		yxkO	BSU38720	yxkO			xkdO	BSU12680	xkdO
																		ycnK	BSU03960	ycnK			yvcA	BSU34850	yvcA
																		yjmF	BSU12350	yjmF			yulD	BSU31190	yulD
																		yjbD		yjbD			cstA	BSU28710	cstA
																		spo0M	BSU08760	spo0M			yjdB	BSU11990	yjdB
																		bdbB	BSU21440	bdbB			yonH	BSU21090	yonH
																		yozB	BSU19140	yozB			xkdW	BSU12760	xkdW
																		ugtP	BSU21920	ugtP			yfiE		yfiE
																		csfB	BSU00240	csfB			xkdH	BSU12620	xkdH
																		yisQ	BSU10820	yisQ			iolC	BSU39740	iolC
																		sunA	BSU21480	sunA			yugM	BSU31340	yugM
																		gudB	BSU22960	gudB			ycgB	BSU03030	ycgB
																		yodC	BSU19550	yodC			ygaO	BSU08890	ygaO
																		yjeA	BSU12100	yjeA			yhfW	BSU10390	yhfW
																		ycnI	BSU03940	ycnI			ytcP	BSU30170	ytcP
																		dppC	BSU12940	dppC			yesL	BSU06940	yesL
																		yezE	BSU06860	yezE			ypiF	BSU22570	ypiF
																		yoeB		yoeB			iolH	BSU39690	iolH
																		yeeG	BSU06820	yeeG			ywmA	BSU36790	ywmA
																		lrpB	BSU05060	lrpB			yfiD		yfiD
																		flgL	BSU35400	flgL			ycbR	BSU02610	ycbR
																		yxlH	BSU38640	yxlH			yisK	BSU10750	yisK
																		ppaC	BSU40550	ppaC			yrhP	BSU27100	yrhP
																		perR	BSU08730	perR			iolI	BSU39680	iolI
																		yumC	BSU32110	yumC			araB	BSU28790	araB
																		rpsR	BSU40890	rpsR			ydzA	BSU04240	ydzA
																		rpsD	BSU29660	rpsD			fbaB		fbaB
																		yaaC	BSU00080	yaaC			yhaS		yhaS
																		cheV	BSU14010	cheV			spoIIIAC	BSU24410	spoIIIAC
																		rpsI	BSU01500	rpsI			leuS	BSU30320	leuS
																		pucK	BSU32440	pucK			yvgW		yvgW
																		rplL	BSU01050	rplL			yckE		yckE
																		rpmA	BSU27940	rpmA			yhcB	BSU09020	yhcB
																		rplT	BSU28850	rplT			yjbD		yjbD
																		ypsB	BSU22180	ypsB			ssb		ssb
																		ydeR	BSU05310	ydeR			yhcA	BSU09010	yhcA
																		dctP	BSU04470	dctP			yurO		yurO
																		resE	BSU23110	resE			yfhC	BSU08480	yfhC
																		resD	BSU23120	resD			opuE	BSU06660	opuE
																		etfB	BSU28530	etfB			ycxC	BSU03550	ycxC
																		ywiE	BSU37240	ywiE			ybcM	BSU01900	ybcM
																		resB	BSU23140	resB			leuB	BSU28270	leuB
																		resA	BSU23150	resA			nin	BSU03420	nin
																		resC	BSU23130	resC			alsS	BSU36010	alsS
																		ansB		ansB			yitJ	BSU11010	yitJ
																		nupC	BSU39410	nupC			yqaS	BSU26200	yqaS
																		qcrA	BSU22560	qcrA			ybcH	BSU01870	ybcH
																		acuA	BSU29690	acuA			yodC	BSU19550	yodC
																		yraO	BSU26860	yraO			yezD	BSU07190	yezD
																		yolJ	BSU21450	yolJ			ybcD		ybcD
																		ydhP		ydhP			yutK	BSU32180	yutK
																		sunT	BSU21470	sunT			yqbM	BSU26060	yqbM
																		drm	BSU23500	drm			ydjE	BSU06170	ydjE
																		ytxE	BSU29720	ytxE			yhcC	BSU09030	yhcC
																		amyE	BSU03040	amyE			yjeA	BSU12100	yjeA
																		recO	BSU25280	recO			yurP		yurP
																		narG	BSU37280	narG			yhjB	BSU10450	yhjB
																		katE	BSU39050	katE			coxA	BSU27830	coxA
																		bofC	BSU27750	bofC			sigE	BSU15320	sigE
																		rocC	BSU37760	rocC			yocN	BSU19280	yocN
																		kdgT	BSU22090	kdgT			cotV	BSU11780	cotV
																		ypwA	BSU22080	ypwA			cgeA	BSU19780	cgeA
																		ywmA	BSU36790	ywmA			cwlD	BSU01530	cwlD
																		punA		punA			spoVAA	BSU23440	spoVAA
																		ald	BSU31930	ald			ydfR	BSU05530	ydfR
																		yoqX	BSU20480	yoqX			yesS	BSU07010	yesS
																		kdgK	BSU22110	kdgK			pta		pta
																		rplF	BSU01310	rplF
																		mmsA	BSU39760	mmsA
																		qoxB	BSU38160	qoxB
																		yfiD		yfiD
																		yrkA	BSU26610	yrkA
																		ysiA		ysiA
																		yuxI		yuxI
																		hemC	BSU28150	hemC
																		bdbA	BSU21460	bdbA
																		dhaS	BSU19310	dhaS
																		yhfD		yhfD
																		yvsH		yvsH
																		rpmGB		rpmGB
																		ybaR	BSU01580	ybaR
																		ydaH	BSU04230	ydaH
																		rpmF	BSU15080	rpmF
																		yhbJ	BSU09000	yhbJ
																		leuD	BSU28250	leuD
																		yrvM	BSU27540	yrvM
																		ydhB	BSU05690	ydhB
																		rpmB	BSU15820	rpmB
																		yvzC	BSU33650	yvzC
																		aroE	BSU25660	aroE
																		yczH	BSU04020	yczH
																		ylaG		ylaG
																		yqjL	BSU23830	yqjL
																		ydgB	BSU05570	ydgB
																		rpsT	BSU25550	rpsT
																		yjhB	BSU12190	yjhB
																		abrB	BSU00370	abrB
																		rplQ	BSU01440	rplQ
																		yabR	BSU00630	yabR
																		maeN	BSU31580	maeN
																		ydgF	BSU05620	ydgF
																		yhcB	BSU09020	yhcB
																		ctsR	BSU00830	ctsR
																		yebC	BSU06380	yebC
																		efp	BSU24450	efp
																		sspE	BSU08660	sspE
																		gltP	BSU02340	gltP
																		yqeY	BSU25400	yqeY
																		rpsO	BSU16680	rpsO
																		ykoA	BSU14420	ykoA
																		ywrK	BSU36030	ywrK
																		yusG	BSU32790	yusG
																		smpB	BSU33600	smpB
																		yccG		yccG
																		yfjT	BSU07970	yfjT
																		yceJ	BSU02960	yceJ
																		fabF	BSU11340	fabF
																		cspB	BSU09100	cspB
																		yuzG	BSU32120	yuzG
																		yutF	BSU32290	yutF
																		yuiF	BSU32040	yuiF
																		ahpF	BSU40100	ahpF
																		frr	BSU16520	frr
																		ftsH	BSU00690	ftsH
																		cspC	BSU05120	cspC
																		yodJ	BSU19620	yodJ
																		mntH	BSU04360	mntH

## Sheet: 3_LBgluc_Regulatory_groups
Genes with fold change >1.7 (from sheet 1) are grouped into three classes; only affected in the DELTAccpA strain, affected in both DELTAccpA and in CcpA-mutant strain, and only affected in the CcpA-mutant strain.
Shown here are the fold changes in gene expression when the CcpA-mutant strains were grown in LB + 1% glucose
Locus tag	Gene	DELTAccpA	CcpA-M17R		Locus tag	Gene	DELTAccpA	CcpA-T62H		Locus tag	Gene	DELTAccpA	CcpA-R304W
BSU35910	rbsR	50.7601			BSU35910	rbsR	50.7601			BSU14160	ykuO	3.51103
BSU35960	rbsB	48.2043			BSU35960	rbsB	48.2043			BSU00490	spoVG	3.48741
BSU35930	rbsD	41.2276			BSU35930	rbsD	41.2276			BSU24960	pstBA	3.36905
BSU35940	rbsA	40.2489			BSU35940	rbsA	40.2489			BSU24970	pstA	3.29658
BSU35950	rbsC	24.6987			BSU35950	rbsC	24.6987			BSU24950	pstBB	3.25178
BSU38040	sacA	14.6984			BSU35970	ywsB	19.7576			BSU23890	yqjG	3.05797
BSU14390	fruK	14.1003			BSU38040	sacA	14.6984			BSU10390	yhfW	2.92237
BSU03990	mtlD	13.1217			BSU06560	yerA	14.2008			BSU24800	yqgW	2.77708
BSU38030	ywdA	11.0664			BSU14390	fruK	14.1003			BSU35310	yvyD	2.56648
BSU09290	glpK	10.5296			BSU03990	mtlD	13.1217			BSU29100	phoR	2.56283
BSU03981	mtlA	9.12927			BSU40340	rocD	12.9352			BSU14910	ctaE	2.5467
BSU35920	rbsK	8.51824			BSU13340	ykoM	12.676			BSU28700	ysfE	2.5457
BSU14380	fruR	7.7314			BSU38030	ywdA	11.0664			BSU39260	bglH	2.543
BSU24990	pstS	7.26101			BSU37790	rocG	10.6305			BSU39250	yxiE	2.53355
BSU08110	sspH	5.35156			BSU09290	glpK	10.5296			BSU14920	ctaF	2.50147
BSU14400	fruA	4.79091			BSU03981	mtlA	9.12927			BSU35980	ywsA	2.47741
BSU26360	yqaD	4.70322			BSU35920	rbsK	8.51824			BSU40490	yycA	2.41808
BSU02140	glpT	4.63099			BSU14380	fruR	7.7314			BSU28710	cstA	2.40597
BSU13510	ykzE	4.36607			BSU24990	pstS	7.26101			BSU07650	yflK	2.36527
BSU28450	sdhC	4.35159			BSU40330	rocE	7.05558			BSU02180	ybfE	2.35642
BSU38050	sacP	4.07463			BSU28910	ysbA	5.7756			BSU39270	bglP	2.30117
BSU17000	kbl	4.05491			BSU22730	ndk	5.64645			BSU04160	mtlR	2.29474
BSU04730	sigB	4.02743			BSU08110	sspH	5.35156			BSU14890	ctaC	2.25041
BSU16990	tdh	3.95385			BSU22550	qcrB	5.19618			BSU30560	pckA	2.16158
BSU22540	qcrC	3.86825			BSU25190	cccA	5.19388			BSU29500	ytfJ	2.13114
BSU09280	glpF	3.80996			BSU14400	fruA	4.79091			BSU28810	abnA	2.12965
BSU28750	araN	3.69226			BSU26360	yqaD	4.70322			BSU04530	ydbN	2.12455
BSU28430	sdhB	3.67747			BSU02140	glpT	4.63099			BSU22650	trpF	2.11557
BSU02130	glpQ	3.61233			BSU27770	yrbE	4.52146			BSU39340	hutP	2.08281
BSU08100	acoR	3.52182			BSU13510	ykzE	4.36607			BSU17710	tatAC	2.07505
BSU14160	ykuO	3.51103			BSU28450	sdhC	4.35159			BSU10230	yhfH	2.05685
BSU00490	spoVG	3.48741			BSU19360	odhB	4.25464			BSU07560	pel	2.04566
BSU17990	sspO	3.43886			BSU38050	sacP	4.07463			BSU06410	yebG	2.02704
BSU08810	senS	3.43788			BSU17000	kbl	4.05491			BSU05360	ydfC	2.02
BSU26820	yrpD	3.38108			BSU04730	sigB	4.02743			BSU14150	ykuN	2.01087
BSU24960	pstBA	3.36905			BSU16990	tdh	3.95385			BSU17330	miaA	2.00545
BSU24970	pstA	3.29658			BSU22540	qcrC	3.86825			BSU10770	wprA	2.00226
BSU24950	pstBB	3.25178			BSU09280	glpF	3.80996			BSU04000	ycsA	1.97959
BSU29110	phoP	3.22439			BSU40060	gntK	3.78611			BSU29770	ytxH	1.97883
BSU24650	yqzG	3.20959			BSU28750	araN	3.69226			BSU09630	yhdX	1.97102
BSU23890	yqjG	3.05797			BSU28430	sdhB	3.67747			BSU38570	licA	1.95644
BSU28440	sdhA	3.00565			BSU16090	sucC	3.66263			BSU05950	ydiF	1.95288
BSU08890	ygaO	2.9949			BSU02130	glpQ	3.61233			BSU28720	abfA	1.95272
BSU10390	yhfW	2.92237			BSU37770	rocB	3.59315			BSU33380	yvgL	1.94918
BSU03480	srfAA	2.84563			BSU36670	csbD	3.57452			BSU24780	yqgY	1.93846
BSU24800	yqgW	2.77708			BSU08100	acoR	3.52182			BSU03490	srfAB	1.93635
BSU36870	atpB	2.72319			BSU14160	ykuO	3.51103			BSU18220	yngF	1.90321
BSU38810	msmX	2.6743			BSU00490	spoVG	3.48741			BSU03510	srfAC	1.90066
BSU29100	phoR	2.56283			BSU29140	citZ	3.45693			BSU13490	ykrL	1.88578
BSU14910	ctaE	2.5467			BSU31330	yugN	3.44636			BSU06960	yesN	1.88478
BSU28700	ysfE	2.5457			BSU17990	sspO	3.43886			BSU14900	ctaD	1.88228
BSU39260	bglH	2.543			BSU08810	senS	3.43788			BSU36860	atpE	1.87658
BSU14920	ctaF	2.50147			BSU29710	acuC	3.39571			BSU20340	yorL	1.87465
BSU35980	ywsA	2.47741			BSU26820	yrpD	3.38108			BSU14140	ccpC	1.86442
BSU40490	yycA	2.41808			BSU24960	pstBA	3.36905			BSU22580	ypiB	1.83599
BSU28710	cstA	2.40597			BSU24950	pstBB	3.25178			BSU31190	yulD	1.83458
BSU07650	yflK	2.36527			BSU29110	phoP	3.22439			BSU14170	ykuP	1.83202
BSU02180	ybfE	2.35642			BSU24650	yqzG	3.20959			BSU14610	pdhD	1.82481
BSU39740	iolC	2.32485			BSU23890	yqjG	3.05797			BSU12800	xhlB	1.82005
BSU17600	xylA	2.31029			BSU28440	sdhA	3.00565			BSU06020	groES	1.8198
BSU39270	bglP	2.30117			BSU08890	ygaO	2.9949			BSU12710	xkdR	1.79446
BSU04160	mtlR	2.29474			BSU14660	ykzI	2.96015			BSU03500	comS	1.7831
BSU14890	ctaC	2.25041			BSU38190	galT	2.95827			BSU10730	yisI	1.78224
BSU27760	csbX	2.21648			BSU10390	yhfW	2.92237			BSU10870	yisU	1.77227
BSU30560	pckA	2.16158			BSU37210	ywjC	2.89217			BSU04100	kipR	1.7703
BSU29680	acsA	2.13911			BSU03480	srfAA	2.84563			BSU14870	ctaA	1.75607
BSU29500	ytfJ	2.13114			BSU13020	ykgA	2.80253			BSU24860	yqgQ	1.75593
BSU28810	abnA	2.12965			BSU24800	yqgW	2.77708			BSU27210	yrhF	1.74046
BSU04530	ydbN	2.12455			BSU23550	mleA	2.7516			BSU13810	ykvS	1.73993
BSU24360	spoIIIAH	2.12421			BSU36870	atpB	2.72319			BSU25150	yqfQ	1.73131
BSU36810	atpD	2.11976			BSU30660	ytkA	2.69249			BSU12520	xkdB	1.72693
BSU22650	trpF	2.11557			BSU18010	yneN	2.68278			BSU38560	licH	1.70918
BSU24560	gcvPA	2.10658			BSU38810	msmX	2.6743			BSU29460	moaB	-1.85379
BSU36880	atpI	2.10378			BSU14130	ykuL	2.58649			BSU08990	yhbI	-1.92918
BSU39340	hutP	2.08281			BSU35310	yvyD	2.56648			BSU32260	hom	-1.93185
BSU17710	tatAC	2.07505			BSU29100	phoR	2.56283			BSU15540	pyrD	-1.96036
BSU10230	yhfH	2.05685			BSU35180	csbA	2.55457			BSU16620	ylxQ	-2.02626
BSU07560	pel	2.04566			BSU14910	ctaE	2.5467			BSU28260	leuC	-2.03737
BSU06410	yebG	2.02704			BSU28700	ysfE	2.5457			BSU21620	yokE	-2.05953
BSU17330	miaA	2.00545			BSU39260	bglH	2.543			BSU23070	serA	-2.06564
BSU36800	atpC	2.00447			BSU39250	yxiE	2.53355			BSU24320	nusB	-2.10019
BSU10770	wprA	2.00226			BSU14920	ctaF	2.50147			BSU22690	aroH	-2.12356
BSU04000	ycsA	1.97959			BSU35980	ywsA	2.47741			BSU39230	wapA	-2.18237
BSU09630	yhdX	1.97102			BSU04400	gsiB	2.46712			BSU39220	yxxG	-2.2277
BSU38570	licA	1.95644			BSU40490	yycA	2.41808			BSU13960	ykwC	-2.22934
BSU05950	ydiF	1.95288			BSU28710	cstA	2.40597			BSU17700	cotC	-2.29799
BSU28720	abfA	1.95272			BSU07650	yflK	2.36527			BSU32250	thrC	-2.38918
BSU24780	yqgY	1.93846			BSU02180	ybfE	2.35642			BSU29220	ytsJ	-2.58515
BSU03490	srfAB	1.93635			BSU23560	mleN	2.34981			BSU29740	ccpA	-2.8827
BSU18220	yngF	1.90321			BSU06570	yerB	2.33497			BSU36000	alsD	-2.92451
BSU03510	srfAC	1.90066			BSU39740	iolC	2.32485			BSU28290	ilvC	-3.19683
BSU14600	pdhC	1.89431			BSU17600	xylA	2.31029			BSU32090	yuiA	-3.34211
BSU13490	ykrL	1.88578			BSU39270	bglP	2.30117			BSU28300	ilvH	-3.91665
BSU06960	yesN	1.88478			BSU04160	mtlR	2.29474			BSU29470	ackA	-4.34903
BSU14900	ctaD	1.88228			BSU14890	ctaC	2.25041			BSU35910	rbsR	50.7601	13.9489
BSU20340	yorL	1.87465			BSU30650	dps	2.24081			BSU35960	rbsB	48.2043	15.2486
BSU14140	ccpC	1.86442			BSU27760	csbX	2.21648			BSU35930	rbsD	41.2276	9.77515
BSU28560	lcfA	1.86081			BSU29780	ytxG	2.20272			BSU35940	rbsA	40.2489	9.84233
BSU22580	ypiB	1.83599			BSU30560	pckA	2.16158			BSU35950	rbsC	24.6987	4.72536
BSU31190	yulD	1.83458			BSU29680	acsA	2.13911			BSU35970	ywsB	19.7576	9.3372
BSU14170	ykuP	1.83202			BSU29500	ytfJ	2.13114			BSU38040	sacA	14.6984	18.0989
BSU14610	pdhD	1.82481			BSU28810	abnA	2.12965			BSU06560	yerA	14.2008	11.6633
BSU12800	xhlB	1.82005			BSU04530	ydbN	2.12455			BSU14390	fruK	14.1003	4.03481
BSU06020	groES	1.8198			BSU24360	spoIIIAH	2.12421			BSU03990	mtlD	13.1217	2.38426
BSU28520	etfA	1.80536			BSU36810	atpD	2.11976			BSU40340	rocD	12.9352	8.02956
BSU12710	xkdR	1.79446			BSU36850	atpF	2.11819			BSU13340	ykoM	12.676	3.42727
BSU39400	pdp	1.79343			BSU22650	trpF	2.11557			BSU38030	ywdA	11.0664	5.69435
BSU03500	comS	1.7831			BSU24560	gcvPA	2.10658			BSU37790	rocG	10.6305	8.849
BSU10730	yisI	1.78224			BSU36880	atpI	2.10378			BSU09290	glpK	10.5296	5.13023
BSU10870	yisU	1.77227			BSU39340	hutP	2.08281			BSU37780	rocA	9.36832	5.07029
BSU04100	kipR	1.7703			BSU17710	tatAC	2.07505			BSU03981	mtlA	9.12927	2.56537
BSU27210	yrhF	1.74046			BSU07850	yfkM	2.05797			BSU35920	rbsK	8.51824	5.13667
BSU13810	ykvS	1.73993			BSU10230	yhfH	2.05685			BSU14380	fruR	7.7314	3.50954
BSU40070	gntP	1.73874			BSU36830	atpA	2.05371			BSU24990	pstS	7.26101	3.33154
BSU25150	yqfQ	1.73131			BSU18000	citB	2.05344			BSU40330	rocE	7.05558	4.99612
BSU12520	xkdB	1.72693			BSU07560	pel	2.04566			BSU28910	ysbA	5.7756	2.76197
BSU38560	licH	1.70918			BSU29700	acuB	2.03292			BSU22730	ndk	5.64645	3.59154
BSU14590	pdhB	1.70094			BSU06410	yebG	2.02704			BSU08110	sspH	5.35156	1.74571
BSU09660	yheN	-1.70988			BSU05360	ydfC	2.02			BSU22550	qcrB	5.19618	2.61158
BSU29460	moaB	-1.85379			BSU36820	atpG	2.01242			BSU25190	cccA	5.19388	2.01299
BSU08990	yhbI	-1.92918			BSU14150	ykuN	2.01087			BSU14400	fruA	4.79091	2.53921
BSU32260	hom	-1.93185			BSU17330	miaA	2.00545			BSU26360	yqaD	4.70322	2.59463
BSU16620	ylxQ	-2.02626			BSU36800	atpC	2.00447			BSU02140	glpT	4.63099	4.48764
BSU28260	leuC	-2.03737			BSU10770	wprA	2.00226			BSU27770	yrbE	4.52146	3.12944
BSU21620	yokE	-2.05953			BSU04000	ycsA	1.97959			BSU13510	ykzE	4.36607	2.49316
BSU23070	serA	-2.06564			BSU29770	ytxH	1.97883			BSU28450	sdhC	4.35159	3.5441
BSU24320	nusB	-2.10019			BSU09630	yhdX	1.97102			BSU19360	odhB	4.25464	4.50501
BSU22690	aroH	-2.12356			BSU38570	licA	1.95644			BSU38050	sacP	4.07463	4.93764
BSU39230	wapA	-2.18237			BSU05950	ydiF	1.95288			BSU17000	kbl	4.05491	2.4004
BSU39220	yxxG	-2.2277			BSU28720	abfA	1.95272			BSU04730	sigB	4.02743	2.45138
BSU13960	ykwC	-2.22934			BSU33380	yvgL	1.94918			BSU16990	tdh	3.95385	3.03371
BSU17700	cotC	-2.29799			BSU24780	yqgY	1.93846			BSU22540	qcrC	3.86825	2.39346
BSU32250	thrC	-2.38918			BSU03490	srfAB	1.93635			BSU09280	glpF	3.80996	4.00034
BSU03000	opuAC	-2.56518			BSU18220	yngF	1.90321			BSU40060	gntK	3.78611	3.09034
BSU29740	ccpA	-2.8827			BSU03510	srfAC	1.90066			BSU28750	araN	3.69226	2.01649
BSU36000	alsD	-2.92451			BSU14600	pdhC	1.89431			BSU28430	sdhB	3.67747	3.22057
BSU28290	ilvC	-3.19683			BSU13490	ykrL	1.88578			BSU16090	sucC	3.66263	5.28445
BSU32090	yuiA	-3.34211			BSU06960	yesN	1.88478			BSU02130	glpQ	3.61233	1.91104
BSU28300	ilvH	-3.91665			BSU14900	ctaD	1.88228			BSU37770	rocB	3.59315	2.97328
BSU29470	ackA	-4.34903			BSU36860	atpE	1.87658			BSU36670	csbD	3.57452	2.15636
BSU35970	ywsB	19.7576	4.12976		BSU20340	yorL	1.87465			BSU08100	acoR	3.52182	2.27604
BSU06560	yerA	14.2008	9.33109		BSU14140	ccpC	1.86442			BSU29140	citZ	3.45693	5.37427
BSU40340	rocD	12.9352	7.8404		BSU28560	lcfA	1.86081			BSU31330	yugN	3.44636	2.07141
BSU13340	ykoM	12.676	5.47624		BSU29120	mdh	1.85477			BSU17990	sspO	3.43886	2.96155
BSU37790	rocG	10.6305	3.85359		BSU22580	ypiB	1.83599			BSU08810	senS	3.43788	2.32289
BSU37780	rocA	9.36832	5.72573		BSU36840	atpH	1.83471			BSU29710	acuC	3.39571	2.32828
BSU40330	rocE	7.05558	3.17346		BSU31190	yulD	1.83458			BSU26820	yrpD	3.38108	2.59927
BSU28910	ysbA	5.7756	6.44633		BSU14610	pdhD	1.82481			BSU29110	phoP	3.22439	2.33721
BSU22730	ndk	5.64645	4.54628		BSU12800	xhlB	1.82005			BSU24650	yqzG	3.20959	2.34724
BSU22550	qcrB	5.19618	1.73445		BSU06020	groES	1.8198			BSU28440	sdhA	3.00565	4.57332
BSU25190	cccA	5.19388	2.07458		BSU28520	etfA	1.80536			BSU08890	ygaO	2.9949	2.14258
BSU27770	yrbE	4.52146	6.27993		BSU12710	xkdR	1.79446			BSU14660	ykzI	2.96015	2.17522
BSU19360	odhB	4.25464	2.62196		BSU39400	pdp	1.79343			BSU38190	galT	2.95827	2.1387
BSU40060	gntK	3.78611	2.09611		BSU03500	comS	1.7831			BSU37210	ywjC	2.89217	2.11912
BSU16090	sucC	3.66263	3.65224		BSU10730	yisI	1.78224			BSU16100	sucD	2.88935	2.02545
BSU37770	rocB	3.59315	3.20048		BSU10870	yisU	1.77227			BSU03480	srfAA	2.84563	1.79631
BSU36670	csbD	3.57452	4.57422		BSU04100	kipR	1.7703			BSU13020	ykgA	2.80253	2.9523
BSU29140	citZ	3.45693	4.43752		BSU14870	ctaA	1.75607			BSU23550	mleA	2.7516	2.18853
BSU31330	yugN	3.44636	1.78475		BSU24860	yqgQ	1.75593			BSU36870	atpB	2.72319	2.93029
BSU29710	acuC	3.39571	2.04926		BSU27210	yrhF	1.74046			BSU30660	ytkA	2.69249	3.13849
BSU14660	ykzI	2.96015	3.84567		BSU13810	ykvS	1.73993			BSU18010	yneN	2.68278	2.24819
BSU38190	galT	2.95827	2.38214		BSU40070	gntP	1.73874			BSU38810	msmX	2.6743	2.67785
BSU37210	ywjC	2.89217	4.07926		BSU25150	yqfQ	1.73131			BSU14130	ykuL	2.58649	3.03373
BSU16100	sucD	2.88935	2.75622		BSU12520	xkdB	1.72693			BSU35180	csbA	2.55457	2.06829
BSU13020	ykgA	2.80253	2.41662		BSU38560	licH	1.70918			BSU02110	ybyB	2.52061	2.15961
BSU23550	mleA	2.7516	1.76576		BSU14590	pdhB	1.70094			BSU04400	gsiB	2.46712	1.9504
BSU30660	ytkA	2.69249	3.0078		BSU09660	yheN	-1.70988			BSU23560	mleN	2.34981	3.29206
BSU18010	yneN	2.68278	2.18872		BSU29460	moaB	-1.85379			BSU06570	yerB	2.33497	1.73519
BSU14130	ykuL	2.58649	2.55955		BSU08990	yhbI	-1.92918			BSU39740	iolC	2.32485	2.19076
BSU35310	yvyD	2.56648	3.47728		BSU32260	hom	-1.93185			BSU17600	xylA	2.31029	2.24309
BSU35180	csbA	2.55457	1.90719		BSU15540	pyrD	-1.96036			BSU30650	dps	2.24081	2.22449
BSU39250	yxiE	2.53355	1.93285		BSU16620	ylxQ	-2.02626			BSU27760	csbX	2.21648	2.27366
BSU02110	ybyB	2.52061	3.51944		BSU28260	leuC	-2.03737			BSU29780	ytxG	2.20272	2.61918
BSU04400	gsiB	2.46712	3.9251		BSU21620	yokE	-2.05953			BSU29680	acsA	2.13911	2.03775
BSU23560	mleN	2.34981	1.87022		BSU23070	serA	-2.06564			BSU24360	spoIIIAH	2.12421	1.86661
BSU06570	yerB	2.33497	1.88342		BSU24320	nusB	-2.10019			BSU36810	atpD	2.11976	2.74304
BSU30650	dps	2.24081	3.15466		BSU22690	aroH	-2.12356			BSU36850	atpF	2.11819	2.08483
BSU29780	ytxG	2.20272	2.92243		BSU39230	wapA	-2.18237			BSU24560	gcvPA	2.10658	1.72537
BSU36850	atpF	2.11819	-1.86612		BSU39220	yxxG	-2.2277			BSU36880	atpI	2.10378	2.75215
BSU07850	yfkM	2.05797	1.71371		BSU13960	ykwC	-2.22934			BSU07850	yfkM	2.05797	1.75933
BSU36830	atpA	2.05371	-1.77624		BSU17700	cotC	-2.29799			BSU36830	atpA	2.05371	2.06655
BSU18000	citB	2.05344	2.42945		BSU32250	thrC	-2.38918			BSU18000	citB	2.05344	2.22648
BSU29700	acuB	2.03292	1.70795		BSU03000	opuAC	-2.56518			BSU29700	acuB	2.03292	2.56661
BSU05360	ydfC	2.02	2.5031		BSU29220	ytsJ	-2.58515			BSU36820	atpG	2.01242	2.48105
BSU36820	atpG	2.01242	-1.78361		BSU29740	ccpA	-2.8827			BSU36800	atpC	2.00447	2.06948
BSU14150	ykuN	2.01087	1.79686		BSU36000	alsD	-2.92451			BSU14600	pdhC	1.89431	1.74628
BSU29770	ytxH	1.97883	2.52106		BSU28290	ilvC	-3.19683			BSU28560	lcfA	1.86081	2.34503
BSU33380	yvgL	1.94918	1.73329		BSU32090	yuiA	-3.34211			BSU29120	mdh	1.85477	1.96625
BSU36860	atpE	1.87658	-1.83152		BSU28300	ilvH	-3.91665			BSU36840	atpH	1.83471	2.58982
BSU29120	mdh	1.85477	2.22686		BSU29470	ackA	-4.34903			BSU28520	etfA	1.80536	2.17102
BSU36840	atpH	1.83471	-1.75215		BSU37780	rocA	9.36832	-1.83704		BSU39400	pdp	1.79343	1.92671
BSU14870	ctaA	1.75607	1.8663		BSU24970	pstA	3.29658	-2.11316		BSU40070	gntP	1.73874	1.92733
BSU24860	yqgQ	1.75593	1.73225		BSU16100	sucD	2.88935	-1.74545		BSU14590	pdhB	1.70094	1.7054
BSU15540	pyrD	-1.96036	-2.12183		BSU02110	ybyB	2.52061	-1.81367		BSU09660	yheN	-1.70988	-2.05793
BSU29220	ytsJ	-2.58515	-2.03253		BSU14170	ykuP	1.83202	-1.78818		BSU03000	opuAC	-2.56518	-2.24808
BSU38430	gspA		4.19943		BSU12000	manR		7.8809		BSU04470	dctP		3.54589
BSU07550	yflT		3.84729		BSU12010	manP		5.79817		BSU04710	rsbV		3.23852
BSU04220	ydaG		3.36529		BSU12020	manA		5.0633		BSU23110	resE		2.82125
BSU04710	rsbV		3.11023		BSU17540	ynaF		4.23563		BSU23120	resD		2.56966
BSU09690	nhaX		3.06832		BSU12030	yjdF		2.52736		BSU38430	gspA		2.47465
BSU07800	treP		2.78609		BSU12040	yjdG		1.84519		BSU28530	etfB		2.34743
BSU15100	ylbP		2.75987		BSU15500	pyrC		1.84037		BSU37240	ywiE		2.28677
BSU07810	treA		2.59804		BSU40140	yydJ		1.78893		BSU24000	bmrU		2.24961
BSU04740	rsbX		2.58898		BSU35400	flgL		-1.70348		BSU07550	yflT		2.22424
BSU38180	ywzA		2.55774		BSU07380	yfmQ		-1.70554		BSU23140	resB		2.21955
BSU04720	rsbW		2.54		BSU16000	ylqC		-1.70613		BSU04720	rsbW		2.17489
BSU33530	yvaA		2.50076		BSU08480	yfhC		-1.70672		BSU23150	resA		2.168
BSU20460	yoqZ		2.40411		BSU38640	yxlH		-1.70952		BSU23130	resC		2.16401
BSU38740	cydC		2.21518		BSU29760	ytxJ		-1.72834		BSU27220	yrhE		2.15242
BSU10410	yhzC		2.2137		BSU09530	yhdN		-1.7286		BSU39410	nupC		2.12685
BSU03050	ldh		2.18371		BSU33320	fhuD		-1.72926		BSU04220	ydaG		2.12024
BSU04370	ydaS		2.15728		BSU40550	ppaC		-1.73108		BSU22560	qcrA		2.09873
BSU29760	ytxJ		2.13407		BSU08730	perR		-1.74519		BSU29690	acuA		2.0467
BSU38610	yxzF		2.11578		BSU22790	hbs		-1.76364		BSU26860	yraO		2.04481
BSU18920	phrK		2.10082		BSU38720	yxkO		-1.76879		BSU21450	yolJ		2.0295
BSU38750	cydB		2.09682		BSU03960	ycnK		-1.77281		BSU21470	sunT		2.02652
BSU36720	ywmE		2.09149		BSU12350	yjmF		-1.78909		BSU23500	drm		1.98564
BSU00840	mcsA		2.05594		BSU32110	yumC		-1.79104		BSU29720	ytxE		1.98481
BSU31000	yuaI		2.02682		BSU40890	rpsR		-1.80815		BSU09690	nhaX		1.97914
BSU24000	bmrU		2.01464		BSU08760	spo0M		-1.81366		BSU03040	amyE		1.97183
BSU00850	mcsB		1.98496		BSU21440	bdbB		-1.81379		BSU30930	ytaB		1.96713
BSU04190	ydaD		1.96675		BSU19140	yozB		-1.81545		BSU25280	recO		1.95221
BSU08490	yfhD		1.9512		BSU21920	ugtP		-1.81648		BSU15100	ylbP		1.88739
BSU11850	yjcG		1.95099		BSU29660	rpsD		-1.85945		BSU37280	narG		1.88458
BSU37930	ywdK		1.94654		BSU00240	csfB		-1.87185		BSU39050	katE		1.86979
BSU07880	yfkJ		1.92172		BSU00080	yaaC		-1.87366		BSU27750	bofC		1.86272
BSU06140	gutR		1.92034		BSU10820	yisQ		-1.89301		BSU02830	ycdF		1.84994
BSU35670	gtaB		1.90537		BSU21480	sunA		-1.91335		BSU37760	rocC		1.84715
BSU37310	fnr		1.88876		BSU14010	cheV		-1.92167		BSU22090	kdgT		1.84622
BSU05790	ydhK		1.88355		BSU01500	rpsI		-1.92665		BSU22080	ypwA		1.84021
BSU29130	icd		1.87443		BSU32440	pucK		-1.93561		BSU36790	ywmA		1.82885
BSU32990	mrgA		1.8677		BSU22960	gudB		-1.95623		BSU04740	rsbX		1.82145
BSU11430	oppA		1.86367		BSU19550	yodC		-2.01555		BSU31930	ald		1.82045
BSU00520	ctc		1.85384		BSU01050	rplL		-2.02146		BSU20480	yoqX		1.7906
BSU06400	yebE		1.84497		BSU12100	yjeA		-2.0299		BSU37930	ywdK		1.78557
BSU27220	yrhE		1.83654		BSU37310	fnr		-2.12637		BSU22110	kdgK		1.77974
BSU13640	spo0E		1.83349		BSU27940	rpmA		-2.15424		BSU01310	rplF		1.76516
BSU30020	ytzE		1.82195		BSU03940	ycnI		-2.16281		BSU39760	mmsA		1.75905
BSU31020	yuaF		1.8137		BSU12940	dppC		-2.19416		BSU38160	qoxB		1.75843
BSU31610	mrpB		1.80617		BSU28850	rplT		-2.25812		BSU07810	treA		1.74646
BSU04430	ydbD		1.80413		BSU06860	yezE		-2.31247		BSU26610	yrkA		1.73901
BSU02830	ycdF		1.80392		BSU22180	ypsB		-2.42578		BSU28170	hemA		1.72848
BSU18510	yoxC		1.80312		BSU05310	ydeR		-3.95869		BSU28150	hemC		1.72407
BSU28170	hemA		1.80116		BSU06820	yeeG		-4.65057		BSU21460	bdbA		1.71956
BSU38760	cydA		1.78878		BSU05060	lrpB		-11.3248		BSU19310	dhaS		1.70713
BSU32060	yuiD		1.77919							BSU01580	ybaR		-1.7057
BSU00250	xpaC		1.73646							BSU04230	ydaH		-1.70882
BSU30930	ytaB		1.73604							BSU15080	rpmF		-1.71264
BSU39040	yxiS		1.7286							BSU09000	yhbJ		-1.71316
BSU04380	ydaT		1.71576							BSU00080	yaaC		-1.71461
BSU07590	citT		1.70927							BSU28250	leuD		-1.71729
BSU09300	glpD		-1.79263							BSU27540	yrvM		-1.72429
BSU23910	yqjE		-1.85313							BSU05690	ydhB		-1.73778
BSU03380	yckB		-1.88654							BSU15820	rpmB		-1.74528
BSU23370	ypuA		-1.97758							BSU32110	yumC		-1.74874
BSU15560	pyrE		-2.10104							BSU33650	yvzC		-1.75631
										BSU22600	aroE		-1.75649
										BSU04020	yczH		-1.76404
										BSU23830	yqjL		-1.79259
										BSU05570	ydgB		-1.79289
										BSU25550	rpsT		-1.79386
										BSU12190	yjhB		-1.80258
										BSU00370	abrB		-1.80392
										BSU01440	rplQ		-1.80515
										BSU00630	yabR		-1.81041
										BSU14010	cheV		-1.81932
										BSU31580	maeN		-1.82217
										BSU05620	ydgF		-1.83589
										BSU09020	yhcB		-1.83645
										BSU27940	rpmA		-1.83955
										BSU00830	ctsR		-1.84487
										BSU06380	yebC		-1.84792
										BSU24450	efp		-1.84836
										BSU08660	sspE		-1.8532
										BSU02340	gltP		-1.86276
										BSU25400	yqeY		-1.86571
										BSU16680	rpsO		-1.86835
										BSU14420	ykoA		-1.87278
										BSU36030	ywrK		-1.8792
										BSU35400	flgL		-1.88088
										BSU32790	yusG		-1.88354
										BSU33600	smpB		-1.88357
										BSU07970	yfjT		-1.90825
										BSU02960	yceJ		-1.91294
										BSU11340	fabF		-1.9146
										BSU09100	cspB		-1.91927
										BSU32120	yuzG		-1.92312
										BSU32290	yutF		-1.92554
										BSU32040	yuiF		-1.92761
										BSU38640	yxlH		-1.94262
										BSU40100	ahpF		-1.94645
										BSU16520	frr		-1.96489
										BSU00690	ftsH		-1.9933
										BSU08730	perR		-2.01423
										BSU40550	ppaC		-2.02904
										BSU01050	rplL		-2.03313
										BSU29660	rpsD		-2.04457
										BSU05120	cspC		-2.0924
										BSU19620	yodJ		-2.11842
										BSU32440	pucK		-2.23795
										BSU28850	rplT		-2.32257
										BSU23370	ypuA		-2.34935
										BSU01500	rpsI		-2.39083
										BSU04360	mntH		-2.50674
										BSU40890	rpsR		-2.62634
										BSU22180	ypsB		-2.74342
										BSU05310	ydeR		-3.05247

## Sheet: 4_LB_ALLsignif_fold>1.7
Shown here is the fold change in gene expression for each mutant when the cells were grown on LB without glucose. Fold change is the ratio in gene expression between CcpA_mutant vs. CcpAwt. All significant genes are shown for each CcpA mutant.
- positive fold change: then [mRNA] of the gene is MORE abundant in the CcpAmut strain
- negative fold change: then [mRNA] of the gene is LESS abundant in the CcpAmut strain, compared to the CcpAwt strain
		DELTAccpA				CcpA-M17R				CcpA-T62H				CcpA-R304W
	Lab_0	Fold			Lab_0	Fold			Lab_0	Fold			Lab_0	Fold
BSU03050	ldh	23.2962		BSU37790	rocG	9.13621		BSU03050	ldh	9.06044		BSU02140	glpT	8.92458
BSU03981	mtlA	16.1996		BSU37780	rocA	6.82819		BSU18820	yobB	2.81699		BSU37790	rocG	8.10327
BSU03990	mtlD	13.8756		BSU29140	citZ	4.79095		BSU06470	purQ	2.69006		BSU37770	rocB	6.39372
BSU37780	rocA	9.11007			rocF	4.34783		BSU28300	ilvH	2.67247		BSU40340	rocD	5.78415
BSU04530	ydbN	6.98854		BSU03050	ldh	4.02139		BSU10180	yhfC	2.58384		BSU35970	ywsB	5.75277
BSU24990	pstS	6.58956		BSU10900	yisY	3.51507		BSU18460	gltC	2.24559		BSU37780	rocA	5.35275
	rocF	6.05678		BSU40340	rocD	3.49347		BSU13330	ykoL	2.03192		BSU17000	kbl	5.14511
	yoeB	5.51884			ykrT	2.86014		BSU21320	yomL	2.00084		BSU08110	sspH	4.94379
BSU40340	rocD	5.13458		BSU29120	mdh	2.85596		BSU04880	ydcS	1.9932		BSU16990	tdh	4.5802
BSU35310	yvyD	5.06736		BSU33920	tpiA	2.66355		BSU35360	hag	1.76572		BSU40330	rocE	4.47098
BSU37790	rocG	4.59652			yezB	2.59245		BSU36000	alsD	1.73983		BSU35960	rbsB	4.3901
BSU35930	rbsD	3.48162		BSU03981	mtlA	2.43525		BSU36540	ywnJ	1.70305		BSU35950	rbsC	4.09375
BSU35970	ywsB	3.45747		BSU40330	rocE	2.40668			ydhT	-1.71371		BSU35940	rbsA	3.9088
BSU07380	yfmQ	3.42668		BSU34050	yvfV	2.4022		BSU37220	ywjB	-1.71948		BSU08100	acoR	3.74863
BSU03490	srfAB	3.31549		BSU16090	sucC	2.324			pmi	-1.72502			rocF	3.67063
BSU18000	citB	3.25548		BSU18000	citB	2.26726		BSU36200	ywqI	-1.7299		BSU20180	yosB	3.584
BSU03480	srfAA	3.17961		BSU29130	icd	2.22909		BSU29760	ytxJ	-1.73103		BSU34560	malL	3.46888
BSU23150	resA	3.01184		BSU07940	yfkC	2.12617		BSU29700	acuB	-1.73451		BSU14130	ykuL	3.38873
BSU35950	rbsC	2.95632		BSU01420	rpsK	2.08862		BSU29710	acuC	-1.76115		BSU12650	xkdK	3.36911
BSU38760	cydA	2.93666		BSU25270	glyQ	2.06193		BSU08490	yfhD	-1.78216		BSU35930	rbsD	3.30923
BSU35940	rbsA	2.83224		BSU33950	cggR	2.00099		BSU39810	csbC	-1.81667		BSU12800	xhlB	3.21582
BSU13340	ykoM	2.81902		BSU33910	pgm	1.99434		BSU18510	yoxC	-1.82292		BSU22100	kdgA	3.21255
BSU35960	rbsB	2.72965		BSU33930	pgk	1.97912		BSU37240	ywiE	-1.84352		BSU27760	csbX	3.18944
BSU18010	yneN	2.65001		BSU03480	srfAA	1.96199		BSU16090	sucC	-1.854		BSU25190	cccA	3.15481
BSU03500	comS	2.63689		BSU16310	fliM	1.95478		BSU39960	yxaI	-1.85418		BSU02130	glpQ	3.14987
BSU21480	sunA	2.6144		BSU15110	ylbQ	1.94755			yvdI	-1.85712		BSU18010	yneN	3.14361
BSU29110	phoP	2.61101		BSU35150	yvzB	1.93915		BSU23580	ansA	-1.85715		BSU12780	xepA	3.00455
BSU14160	ykuO	2.3978		BSU28150	hemC	1.90339		BSU28700	ysfE	-1.89311			yocF	2.94323
BSU35910	rbsR	2.30907		BSU31350	pgi	1.89129		BSU29690	acuA	-1.91378		BSU03990	mtlD	2.92936
BSU22560	qcrA	2.30073			ykrS	1.81278		BSU23550	mleA	-1.92047		BSU29680	acsA	2.8861
BSU06560	yerA	2.28986		BSU01280	rplE	1.81159		BSU15470	pyrR	-1.92673		BSU12580	xtmB	2.86971
BSU03510	srfAC	2.27378		BSU01200	rpsS	1.81104		BSU40000	yxnA	-1.93059		BSU18000	citB	2.83816
BSU04470	dctP	2.20459		BSU14600	pdhC	1.77381		BSU28530	etfB	-1.95354			yvfM	2.82871
BSU39340	hutP	2.19225		BSU01310	rplF	1.76664		BSU36670	csbD	-1.95629		BSU35910	rbsR	2.82413
BSU14870	ctaA	2.18165		BSU06560	yerA	1.74818		BSU25190	cccA	-1.97991		BSU17990	sspO	2.81626
BSU16100	sucD	2.18147		BSU11460	oppD	1.73654		BSU28520	etfA	-1.98252		BSU12671	xkdN	2.73925
BSU16980	spoVS	2.14311		BSU35630	lytB	1.72477		BSU16100	sucD	-1.98642		BSU20100	yosJ	2.73012
BSU33950	cggR	2.12989		BSU00110	yaaD	1.72082		BSU35180	csbA	-1.99446		BSU22550	qcrB	2.70759
BSU25190	cccA	2.07583		BSU06250	ydjM	-1.7658		BSU08100	acoR	-1.99584		BSU26360	yqaD	2.70124
BSU14660	ykzI	2.06886		BSU09100	cspB	-1.76979		BSU24750	yqhB	-2.02944		BSU06560	yerA	2.69926
BSU35920	rbsK	2.05109		BSU05100	yddT	-1.7706		BSU23560	mleN	-2.06385		BSU27770	yrbE	2.69091
BSU16990	tdh	2.04027		BSU40580	yybN	-1.81904		BSU21440	bdbB	-2.07785			lacA	2.63989
BSU00490	spoVG	2.0373		BSU40120	yyzE	-1.81904			dra	-2.0878		BSU22540	qcrC	2.61511
BSU15100	ylbP	2.02978		BSU00100	dacA	-1.87144			ydhM	-2.09032			yvfL	2.6082
BSU15900	fabD	2.01575		BSU30260	msmR	-1.87381		BSU30300	melA	-2.11785		BSU08810	senS	2.59818
BSU10130	hemH	1.94353		BSU09270	glpP	-1.88122		BSU09690	nhaX	-2.11787		BSU06950	yesM	2.58681
	yhdO	1.9053		BSU38030	ywdA	-1.8849		BSU08110	sspH	-2.17343		BSU39000	yxjC	2.58507
	ysfD	1.86915		BSU35920	rbsK	-1.94795		BSU31580	maeN	-2.19201		BSU20650	yoqF	2.57677
	ysfC	1.83889		BSU01630	feuA	-1.94984		BSU38050	sacP	-2.20324		BSU38030	ywdA	2.53432
BSU05130	ydeB	1.81706		BSU05390	ydfF	-1.98181		BSU37780	rocA	-2.21069		BSU29700	acuB	2.5219
BSU11430	oppA	1.79837		BSU00260	yaaN	-2.13971		BSU40070	gntP	-2.2297			yocG	2.46389
BSU30660	ytkA	1.7818		BSU02130	glpQ	-2.32386		BSU40080	gntZ	-2.24974		BSU38040	sacA	2.44635
BSU26820	yrpD	1.77619		BSU40110	bglA	-2.40615		BSU21480	sunA	-2.27038		BSU38050	sacP	2.40937
BSU18110	ynfC	1.75114			flgE	-2.43005		BSU07700	nagP	-2.28091		BSU25800	yqcK	2.35969
BSU06580	yerC	1.74659		BSU09300	glpD	-2.48545		BSU07550	yflT	-2.32339		BSU12730	xkdT	2.32709
BSU08610	yfhO	-1.71851		BSU38570	licA	-2.59373		BSU29140	citZ	-2.33594		BSU28720	abfA	2.31917
BSU15470	pyrR	-1.7247		BSU09290	glpK	-2.9947		BSU21450	yolJ	-2.3478		BSU12750	xkdV	2.3145
BSU36760	murAA	-1.75268		BSU35910	rbsR	-3.1891		BSU14140	ccpC	-2.35859		BSU06960	yesN	2.31079
BSU22500	ypjD	-1.81434		BSU35930	rbsD	-3.42318		BSU28770	araL	-2.38704		BSU29110	phoP	2.29409
BSU12990	ykfC	-1.89366		BSU38560	licH	-3.66419			ytiA	-2.41089		BSU13340	ykoM	2.27022
BSU16950	pbpX	-1.89472		BSU35940	rbsA	-3.84517		BSU28430	sdhB	-2.43695		BSU10170	fabHB	2.25909
BSU30260	msmR	-1.9031		BSU35960	rbsB	-3.96805		BSU14660	ykzI	-2.47334		BSU39540	yxeI	2.23882
BSU30270	msmE	-1.96747		BSU24980	pstC	-4.05336		BSU21470	sunT	-2.47687		BSU20530	yoqS	2.23356
BSU39200	yxzC	-2.0152		BSU12010	manP	-7.09959		BSU07820	treR	-2.49999		BSU21170	yomZ	2.21438
BSU25680	yqeG	-2.02446		BSU12000	manR	-7.60563		BSU38190	galT	-2.55405		BSU03460	hxlA	2.21365
BSU39230	wapA	-2.13553		BSU12020	manA	-12.1053			yqhA	-2.56377		BSU34450	sacB	2.21055
BSU31580	maeN	-2.17099		BSU12030	yjdF	-14.4788		BSU19360	odhB	-2.56886			ydhN	2.20067
BSU39220	yxxG	-2.31012						BSU30660	ytkA	-2.59391			yhaT	2.19705
BSU00270	yaaO	-2.3538						BSU04740	rsbX	-2.60005		BSU08270	yfiH	2.18329
BSU38590	licB	-2.37081						BSU14130	ykuL	-2.60844		BSU23540	yqkK	2.18172
BSU39260	bglH	-2.42509						BSU28440	sdhA	-2.61567		BSU28770	araL	2.16328
BSU35260	ftsE	-2.48212						BSU04720	rsbW	-2.6602		BSU15100	ylbP	2.15069
BSU07800	treP	-2.5365						BSU06560	yerA	-2.7557		BSU26860	yraO	2.13252
BSU29470	ackA	-2.60082						BSU04470	dctP	-2.78403		BSU31330	yugN	2.13218
BSU39270	bglP	-2.70354						BSU35920	rbsK	-2.80296		BSU29710	acuC	2.12736
BSU07810	treA	-2.94796						BSU28900	ysbB	-2.86034		BSU35980	ywsA	2.12436
BSU40060	gntK	-3.00794							odhA	-2.87219		BSU28560	lcfA	2.12025
BSU38570	licA	-3.24969						BSU39410	nupC	-2.8906		BSU28510	xsa	2.1136
BSU38580	licC	-3.37206						BSU38580	licC	-2.94553		BSU22560	qcrA	2.10385
BSU38560	licH	-3.45663						BSU27770	yrbE	-3.01628		BSU24360	spoIIIAH	2.10248
BSU23580	ansA	-4.13026						BSU38560	licH	-3.02814		BSU29690	acuA	2.10183
BSU09300	glpD	-5.02307						BSU02110	ybyB	-3.03711		BSU07410	yfmN	2.08669
BSU12000	manR	-5.45893						BSU21460	bdbA	-3.15706		BSU23320	ypzC	2.08121
BSU40120	yyzE	-5.73226						BSU09280	glpF	-3.16279		BSU20160	yosD	2.06573
BSU40110	bglA	-6.67441						BSU08060	acoA	-3.17276		BSU12770	xkdX	2.05384
BSU29740	ccpA	-7.51823						BSU22730	ndk	-3.17919			ykzA	2.035
BSU12010	manP	-10.1798						BSU13340	ykoM	-3.20258		BSU14150	ykuN	2.02967
BSU12020	manA	-10.959						BSU04220	ydaG	-3.23329		BSU13510	ykzE	2.02897
BSU12030	yjdF	-17.1403						BSU40060	gntK	-3.33436			ydhS	2.02067
								BSU12020	manA	-3.38746		BSU03040	amyE	2.01926
								BSU38590	licB	-3.44099		BSU39350	hutH	2.01292
								BSU35970	ywsB	-3.45314		BSU22090	kdgT	2.00042
								BSU12030	yjdF	-3.58453			yteQ	1.99785
								BSU37210	ywjC	-3.59136		BSU14900	ctaD	1.99456
								BSU04710	rsbV	-3.60463			yuxI	1.98009
								BSU28910	ysbA	-3.62262		BSU21230	yomT	1.96696
								BSU38430	gspA	-3.75209		BSU14160	ykuO	1.95453
								BSU30260	msmR	-3.81883		BSU04440	dctB	1.94898
								BSU38570	licA	-3.97362		BSU20720	yopY	1.94426
								BSU39400	pdp	-3.97961		BSU38460	tyrZ	1.93781
								BSU27750	bofC	-3.99228		BSU24650	yqzG	1.92488
								BSU38810	msmX	-4.00064		BSU22110	kdgK	1.91138
								BSU34500	yvdR	-4.16227		BSU07610	citM	1.91025
								BSU40120	yyzE	-4.19953		BSU28780	araD	1.90975
									yezB	-4.29426		BSU21120	yonE	1.90041
								BSU39270	bglP	-4.39389		BSU29400	ytlI	1.89285
								BSU04100	kipR	-4.45672		BSU02580	ycbO	1.88967
								BSU02130	glpQ	-4.55064		BSU21060	yonK	1.8875
								BSU35950	rbsC	-4.98219		BSU34580	yvdJ	1.87979
								BSU07810	treA	-5.31153		BSU37760	rocC	1.8755
								BSU07940	yfkC	-5.84909			yveN	1.87099
								BSU39250	yxiE	-6.11362		BSU04000	ycsA	1.87094
								BSU07800	treP	-6.25191			ywdC	1.87087
								BSU09290	glpK	-6.64226		BSU38810	msmX	1.86689
								BSU35940	rbsA	-6.93263		BSU07560	pel	1.86564
								BSU09300	glpD	-6.94659		BSU31945	yukJ	1.86475
								BSU39260	bglH	-7.88591		BSU03780	phrC	1.86072
								BSU40110	bglA	-8.05073		BSU04160	mtlR	1.8593
								BSU38040	sacA	-8.61872		BSU04460	dctR	1.85867
									yhaT	-8.64438		BSU09830	yhaX	1.85553
								BSU35910	rbsR	-9.21097		BSU12680	xkdO	1.84909
								BSU38030	ywdA	-9.96062		BSU34850	yvcA	1.84719
								BSU35930	rbsD	-10.7763		BSU31190	yulD	1.84501
								BSU35960	rbsB	-12.4148		BSU28710	cstA	1.84399
								BSU10900	yisY	-20.3929		BSU11990	yjdB	1.84378
								BSU01220	rpsC	-20.8884		BSU21090	yonH	1.84372
									yhaP	-57.4975		BSU12760	xkdW	1.84048
													yfiE	1.83898
												BSU12620	xkdH	1.83574
												BSU39740	iolC	1.82584
												BSU31340	yugM	1.82398
												BSU03030	ycgB	1.81195
												BSU27750	bofC	1.79747
												BSU08890	ygaO	1.78173
												BSU10390	yhfW	1.77941
												BSU30170	ytcP	1.76742
												BSU06940	yesL	1.76437
												BSU22570	ypiF	1.7603
													pmi	1.75941
												BSU39690	iolH	1.75568
												BSU36790	ywmA	1.75455
													yfiD	1.75327
												BSU02610	ycbR	1.74837
												BSU16100	sucD	1.74819
												BSU10750	yisK	1.74423
												BSU27100	yrhP	1.74181
												BSU14140	ccpC	1.73134
												BSU39680	iolI	1.72592
												BSU28790	araB	1.72586
												BSU04240	ydzA	1.71666
												BSU26820	yrpD	1.71141
												BSU28700	ysfE	1.711
													fbaB	1.70581
												BSU30660	ytkA	1.70483
													yhaS	1.7002
												BSU24410	spoIIIAC	-1.70326
												BSU30320	leuS	-1.71168
													yvgW	-1.72215
													yckE	-1.73035
												BSU09020	yhcB	-1.73268
												BSU40080	gntZ	-1.73486
													yjbD	-1.74103
													ssb	-1.74135
												BSU09010	yhcA	-1.74651
													yurO	-1.74659
												BSU08480	yfhC	-1.75412
												BSU06660	opuE	-1.76187
												BSU03550	ycxC	-1.76535
												BSU01900	ybcM	-1.77628
												BSU28270	leuB	-1.77913
												BSU03420	nin	-1.78198
												BSU12030	yjdF	-1.78849
												BSU36010	alsS	-1.82986
												BSU11010	yitJ	-1.83586
												BSU26200	yqaS	-1.85302
												BSU01870	ybcH	-1.86961
												BSU19550	yodC	-1.88472
												BSU07190	yezD	-1.89123
													ybcD	-1.90342
												BSU32180	yutK	-1.9127
												BSU26060	yqbM	-1.94575
														-1.95279
												BSU06170	ydjE	-1.9725
												BSU09030	yhcC	-1.97999
												BSU12100	yjeA	-1.984
													yurP	-2.08914
												BSU10450	yhjB	-2.09769
												BSU36000	alsD	-2.10388
												BSU27830	coxA	-2.18545
												BSU15320	sigE	-2.22651
												BSU18820	yobB	-2.2343
												BSU19280	yocN	-2.25388
												BSU11780	cotV	-2.27244
												BSU19780	cgeA	-2.31842
												BSU31580	maeN	-2.34165
												BSU01530	cwlD	-2.40548
												BSU23440	spoVAA	-2.44385
												BSU05530	ydfR	-2.60376
												BSU40120	yyzE	-2.61911
												BSU40110	bglA	-2.77485
												BSU07010	yesS	-2.7998
													yoeB	-2.8281
													pta	-2.85008
												BSU12000	manR	-4.54463
												BSU12020	manA	-13.4592
												BSU12010	manP	-13.804

## Sheet: 5_LB_Venn_diagram_fold>1.7
VENNdiagram (figure 2B in main tekst). To represent differences/similarities between the mutants when the strains were grown on LB without glucose.
All significant genes per mutant are uploaded to the venny webtool. http://bioinfogp.cnb.csic.es/tools/venny/
	Figure 2B in main tekst																	this figure is not in main text
															TOTAL:													The genes in the three groups from figure 2:
36	3	6	12	10	7	6	9	33	6	2	1	65	19	151	366			LB+1%glucose_20140327b					LB_20140605					244	182	184
Elements only in "DELTAccpA":	Common elements in "DELTAccpA" and "M17R":	Common elements in "DELTAccpA", "M17R" and "T62H":	Common elements in "DELTAccpA" and "T62H":	Common elements in "DELTAccpA", "M17R", "T62H" and "R304W":	Common elements in "DELTAccpA", "T62H" and "R304W":	Common elements in "DELTAccpA", "M17R" and "R304W":	Common elements in "DELTAccpA" and "R304W":	Elements only in "M17R":	Common elements in "M17R" and "T62H":	Common elements in "M17R", "T62H" and "R304W":	Common elements in "M17R" and "R304W":	Elements only in "T62H":	Common elements in "T62H" and "R304W":	Elements only in "R304W":				paste here: all groups from the VENN diagram					paste here: all groups from the VENN diagram					Elements only in "LB 1%gluc":	Common elements in "LB 1%gluc" and "LB":	Elements only in "LB":
ydbN	mtlA	ldh	sunA	rocA	ywsB	rocF	mtlD	ykrT	citZ	ywdA	rocE	purQ	yobB	glpT				ALL significant on LB+1%glucose. TOTAL 426					ALL significant on LB. TOTAL 366					pstBA	ykuO	spoVS
pstS	srfAA	rbsK	dctP	rbsD	rbsC	rocD	yoeB	mdh	yisY	glpQ		ilvH	alsD	rocB				ykuO	BSU14160	ykuO			ydbN	BSU04530	ydbN			yrkG	spoVG	fabD
yvyD	cggR	msmR	ykzI	rbsA	ykoM	rocG	yneN	tpiA	yezB			yhfC	pmi	kbl				spoVG	BSU00490	spoVG			pstS	BSU24990	pstS			pstBB	yhfW	hemH
yfmQ		licA	pyrR	rbsB	sucD	citB	phoP	yvfV	sucC			gltC	acuB	yosB				pstBA	BSU24960	pstBA			yvyD	BSU35310	yvyD			yqjG	lacA	yhdO
srfAB		licH	licB	rbsR	cccA	manR	ykuO	icd	yfkC			ykoL	acuC	malL				yrkG		yrkG			yfmQ	BSU07380	yfmQ			yqgW	ysfE	ysfD
resA		glpD	bglH	yerA	ytkA	manP	qcrA	rpsK	glpK			yomL	ysfE	xkdK				pstBB	BSU24950	pstBB			srfAB	BSU03490	srfAB			phoR	bglH	ysfC
cydA			treP	yyzE	maeN		tdh	glyQ				ydcS	acuA	xhlB				yqjG	BSU23890	yqjG			resA	BSU23150	resA			ctaE	ywsA	ydeB
comS			bglP	bglA			ylbP	pgm				hag	acoR	kdgA				yhfW	BSU10390	yhfW			cydA	BSU38760	cydA			ctaF	cstA	ynfC
srfAC			treA	manA			yrpD	pgk				ywnJ	sspH	csbX				lacA		lacA			comS	BSU03500	comS			yuiI	ydhN	yerC
hutP			gntK	yjdF				fliM				ydhT	sacP	xepA				yqgW	BSU24800	yqgW			srfAC	BSU03510	srfAC			yycA	bglP	yfhO
ctaA			licC					ylbQ				ywjB	gntZ	yocF				phoR	BSU29100	phoR			hutP	BSU39340	hutP			yflK	mtlR	murAA
spoVS			ansA					yvzB				ywqI	ccpC	acsA				ctaE	BSU14910	ctaE			ctaA	BSU14870	ctaA			ybfE	ydhT	ypjD
spoVG								hemC				ytxJ	araL	xtmB				ysfE	BSU28700	ysfE			spoVS	BSU16980	spoVS			yxiA	ydbN	ykfC
fabD								pgi				yfhD	ykuL	yvfM				bglH	BSU39260	bglH			spoVG	BSU00490	spoVG			ctaC	hutP	pbpX
hemH								ykrS				csbC	yrbE	sspO				ctaF	BSU14920	ctaF			fabD	BSU15900	fabD			pckA	pel	msmE
yhdO								rplE				yoxC	bofC	xkdN				ywsA	BSU35980	ywsA			hemH	BSU10130	hemH			ytfJ	yhaS	yxzC
ysfD								rpsS				ywiE	msmX	yosJ				yuiI		yuiI			yhdO		yhdO			abnA	ycsA	yqeG
ysfC								pdhC				yxaI	sacA	qcrB				yycA	BSU40490	yycA			ysfD		ysfD			trpF	licA	yaaO
ydeB								rplF				yvdI	yhaT	yqaD				cstA	BSU28710	cstA			ysfC		ysfC			tatAC	abfA	ftsE
oppA								oppD				mleA		lacA				ydhN		ydhN			ydeB	BSU05130	ydeB			yvfK	srfAB	cggR
ynfC								lytB				yxnA		qcrC				yflK	BSU07650	yflK			oppA	BSU11430	oppA			yhfH	srfAC	msmR
yerC								yaaD				etfB		yvfL				ybfE	BSU02180	ybfE			ynfC	BSU18110	ynfC			yebG	yesN	pyrR
yfhO								ydjM				csbD		senS				yxiA		yxiA			yerC	BSU06580	yerC			miaA	ctaD	licB
murAA								cspB				etfA		yesM				bglP	BSU39270	bglP			yfhO	BSU08610	yfhO			wprA	ccpC	licC
ypjD								yddT				csbA		yxjC				mtlR	BSU04160	mtlR			murAA	BSU36760	murAA			yhdX	yulD	ansA
ykfC								yybN				yqhB		yoqF				ydhT		ydhT			ypjD	BSU22500	ypjD			ydiF	xhlB	yyzE
pbpX								dacA				mleN		yocG				ctaC	BSU14890	ctaC			ykfC	BSU12990	ykfC			yqgY	comS	bglA
msmE								glpP				bdbB		yqcK				pckA	BSU30560	pckA			pbpX	BSU16950	pbpX			yngF	kipR	ykrT
yxzC								feuA				dra		xkdT				ytfJ	BSU29500	ytfJ			msmE	BSU30270	msmE			ykrL	licH	tpiA
yqeG								ydfF				ydhM		abfA				abnA	BSU28810	abnA			yxzC	BSU39200	yxzC			yorL	wapA	yvfV
wapA								yaaN				melA		xkdV				ydbN	BSU04530	ydbN			yqeG	BSU25680	yqeG			ypiB	yxxG	rpsK
yxxG								flgE				nhaX		yesN				trpF	BSU22650	trpF			wapA	BSU39230	wapA			pdhD	pta	glyQ
yaaO								pstC				gntP		fabHB				hutP	BSU39340	hutP			yxxG	BSU39220	yxxG			groES	ccpA	pgm
ftsE												nagP		yxeI				tatAC	BSU17710	tatAC			yaaO	BSU00270	yaaO			xkdR	alsD	pgk
ackA												yflT		yoqS				yvfK		yvfK			ftsE	BSU35260	ftsE			gltB	ilvH	fliM
ccpA												yolJ		yomZ				yhfH	BSU10230	yhfH			ackA	BSU29470	ackA			yisI	ackA	ylbQ
												ytiA		hxlA				pel	BSU07560	pel			ccpA	BSU29740	ccpA			yisU	ydhM	yvzB
												sdhB		sacB				yhaS		yhaS			mtlA	BSU03981	mtlA			yrhA	yvyD	pgi
												sunT		ydhN				yebG	BSU06410	yebG			srfAA	BSU03480	srfAA			yrhF	yxiE	rplE
												treR		yfiH				miaA	BSU17330	miaA			cggR	BSU33950	cggR			ykvS	ykuN	rpsS
												galT		yqkK				wprA	BSU10770	wprA			ldh	BSU03050	ldh			yqfQ	ctaA	oppD
												yqhA		yraO				ycsA	BSU04000	ycsA			rbsK	BSU35920	rbsK			xkdB	rocA	lytB
												odhB		yugN				yhdX	BSU09630	yhdX			msmR	BSU30260	msmR			ytmQ	sucD	yaaD
												rsbX		ywsA				licA	BSU38570	licA			licA	BSU38570	licA			moaB	ybyB	ydjM
												sdhA		lcfA				ydiF	BSU05950	ydiF			licH	BSU38560	licH			yhbI	ywsB	yddT
												rsbW		xsa				abfA	BSU28720	abfA			glpD	BSU09300	glpD			hom	yerA	yybN
												ysbB		spoIIIAH				yqgY	BSU24780	yqgY			sunA	BSU21480	sunA			ylxQ	rocD	dacA
												odhA		yfmN				srfAB	BSU03490	srfAB			dctP	BSU04470	dctP			leuC	ykoM	glpP
												nupC		ypzC				yngF	BSU18220	yngF			ykzI	BSU14660	ykzI			yokE	rocG	feuA
												ybyB		yosD				srfAC	BSU03510	srfAC			pyrR	BSU15470	pyrR			serA	rocE	ydfF
												bdbA		xkdX				ykrL	BSU13490	ykrL			licB	BSU38590	licB			nusB	rocF	yaaN
												glpF		ykzA				yesN	BSU06960	yesN			bglH	BSU39260	bglH			aroH	ysbA	flgE
												acoA		ykuN				ctaD	BSU14900	ctaD			treP	BSU07800	treP			ykwC	ndk	pstC
												ndk		ykzE				yorL	BSU20340	yorL			bglP	BSU39270	bglP			cotC	qcrB	yisY
												ydaG		ydhS				ccpC	BSU14140	ccpC			treA	BSU07810	treA			thrC	cccA	yezB
												ywjC		amyE				ypiB	BSU22580	ypiB			gntK	BSU40060	gntK			ilvC	yrbE	yfkC
												rsbV		hutH				yulD	BSU31190	yulD			licC	BSU38580	licC			yuiA	odhB	purQ
												ysbA		kdgT				pdhD	BSU14610	pdhD			ansA	BSU23580	ansA			ydfC	odhA	yhfC
												gspA		yteQ				xhlB	BSU12800	xhlB			rocA	BSU37780	rocA			ytxH	gntK	gltC
												pdp		ctaD				groES	BSU06020	groES			rbsD	BSU35930	rbsD			yvgL	sucC	ykoL
												yvdR		yuxI				xkdR	BSU12710	xkdR			rbsA	BSU35940	rbsA			atpE	rocB	yomL
												kipR		yomT				gltB		gltB			rbsB	BSU35960	rbsB			yqgQ	csbD	ydcS
												yxiE		dctB				comS	BSU03500	comS			rbsR	BSU35910	rbsR			pyrD	citZ	hag
												rpsC		yopY				yisI	BSU10730	yisI			yerA	BSU06560	yerA			ytsJ	yugN	ywnJ
												yhaP		tyrZ				yisU	BSU10870	yisU			yyzE	BSU40120	yyzE			pstA	acuC	ywjB
														yqzG				kipR	BSU04100	kipR			bglA	BSU40110	bglA			ykuP	ykzI	ywqI
														kdgK				yrhA		yrhA			manA	BSU12020	manA			ykgA	galT	csbC
														citM				yrhF	BSU27210	yrhF			yjdF	BSU12030	yjdF			gsiB	ywjC	yxaI
														araD				ykvS	BSU13810	ykvS			ywsB	BSU35970	ywsB			ybaL	mleA	yvdI
														yonE				yqfQ	BSU25150	yqfQ			rbsC	BSU35950	rbsC			yerB	ytkA	yxnA
														ytlI				xkdB	BSU12520	xkdB			ykoM	BSU13340	ykoM			dps	yneN	yqhB
														ycbO				licH	BSU38560	licH			sucD	BSU16100	sucD			ytxG	ykuL	dra
														yonK				ytmQ		ytmQ			cccA	BSU25190	cccA			atpF	csbA	melA
														yvdJ				moaB	BSU29460	moaB			ytkA	BSU30660	ytkA			yfkM	mleN	treR
														rocC				yhbI	BSU08990	yhbI			maeN	BSU31580	maeN			atpA	pmi	ysbB
														yveN				hom	BSU32260	hom			rocF		rocF			atpG	citB	acoA
														ycsA				ylxQ	BSU16620	ylxQ			rocD	BSU40340	rocD			atpH	acuB	yvdR
														ywdC				leuC	BSU28260	leuC			rocG	BSU37790	rocG			fruK	mdh	rpsC
														pel				yokE	BSU21620	yokE			citB	BSU18000	citB			fruR	yurP	yhaP
														yukJ				serA	BSU23070	serA			manR	BSU12000	manR			fruA	rbsR	yobB
														phrC				nusB	BSU24320	nusB			manP	BSU12010	manP			sdhC	rbsB	gntZ
														mtlR				aroH	BSU22690	aroH			mtlD	BSU03990	mtlD			sigB	rbsD	araL
														dctR				wapA	BSU39230	wapA			yoeB		yoeB			spoIIIC	rbsA	yhaT
														yhaX				yxxG	BSU39220	yxxG			yneN	BSU18010	yneN			araN	rbsC	yosB
														xkdO				ykwC	BSU13960	ykwC			phoP	BSU29110	phoP			atpB	sacA	malL
														yvcA				cotC	BSU17700	cotC			ykuO	BSU14160	ykuO			xylA	mtlD	xkdK
														yulD				thrC	BSU32250	thrC			qcrA	BSU22560	qcrA			atpD	ywdA	kdgA
														cstA				pta		pta			tdh	BSU16990	tdh			gcvPA	glpK	xepA
														yjdB				ccpA	BSU29740	ccpA			ylbP	BSU15100	ylbP			atpI	mtlA	yocF
														yonH				alsD	BSU36000	alsD			yrpD	BSU26820	yrpD			atpC	rbsK	xtmB
														xkdW				ilvC	BSU28290	ilvC			ykrT		ykrT			pdhB	pstS	yvfM
														yfiE				yuiA	BSU32090	yuiA			mdh	BSU29120	mdh			yheN	sspH	xkdN
														xkdH				ilvH	BSU28300	ilvH			tpiA	BSU33920	tpiA			opuAC	yqaD	yosJ
														iolC				ackA	BSU29470	ackA			yvfV	BSU34050	yvfV			ywzA	glpT	yvfL
														yugM				ydhM		ydhM			icd	BSU29130	icd			yvaA	ykzE	yesM
														ycgB				yvyD	BSU35310	yvyD			rpsK	BSU01420	rpsK			yoqZ	sacP	yxjC
														ygaO				yxiE	BSU39250	yxiE			glyQ	BSU25270	glyQ			cydC	kbl	yoqF
														yhfW				ydfC	BSU05360	ydfC			pgm	BSU33910	pgm			yhzC	tdh	yocG
														ytcP				ykuN	BSU14150	ykuN			pgk	BSU33930	pgk			ydaS	qcrC	yqcK
														yesL				ytxH	BSU29770	ytxH			fliM	BSU16310	fliM			yxzF	glpF	xkdT
														ypiF				yvgL	BSU33380	yvgL			ylbQ	BSU15110	ylbQ			phrK	sdhB	xkdV
														iolH				atpE	BSU36860	atpE			yvzB	BSU35150	yvzB			cydB	glpQ	fabHB
														ywmA				ctaA	BSU14870	ctaA			hemC	BSU28150	hemC			ywmE	acoR	yxeI
														yfiD				yqgQ	BSU24860	yqgQ			pgi	BSU31350	pgi			mcsA	sspO	yoqS
														ycbR				pyrD	BSU15540	pyrD			ykrS		ykrS			yuaI	senS	yomZ
														yisK				ytsJ	BSU29220	ytsJ			rplE	BSU01280	rplE			mcsB	yrpD	hxlA
														yrhP				pstA	BSU24970	pstA			rpsS	BSU01200	rpsS			ydaD	phoP	sacB
														iolI				ykuP	BSU14170	ykuP			pdhC	BSU14600	pdhC			yjcG	yqzG	yfiH
														araB				rocA	BSU37780	rocA			rplF	BSU01310	rplF			yfkJ	sdhA	yqkK
														ydzA				sucD	BSU16100	sucD			oppD	BSU11460	oppD			gutR	ygaO	xsa
														fbaB				ybyB	BSU02110	ybyB			lytB	BSU35630	lytB			gtaB	srfAA	yfmN
														yhaS				ywsB	BSU35970	ywsB			yaaD	BSU00110	yaaD			ydhK	msmX	ypzC
														spoIIIAC				yerA	BSU06560	yerA			ydjM	BSU06250	ydjM			mrgA	iolC	yosD
														leuS				rocD	BSU40340	rocD			cspB	BSU09100	cspB			ctc	csbX	xkdX
														yvgW				ykoM	BSU13340	ykoM			yddT	BSU05100	yddT			yebE	acsA	hutH
														yckE				rocG	BSU37790	rocG			yybN	BSU40580	yybN			spo0E	spoIIIAH	yteQ
														yhcB				rocE	BSU40330	rocE			dacA	BSU00100	dacA			ytzE	ydhS	yomT
														yjbD				rocF		rocF			glpP	BSU09270	glpP			yuaF	fbaB	dctB
														ssb				ysbA	BSU28910	ysbA			feuA	BSU01630	feuA			mrpB	pdhC	yopY
														yhcA				ndk	BSU22730	ndk			ydfF	BSU05390	ydfF			ydbD	lcfA	tyrZ
														yurO				qcrB	BSU22550	qcrB			yaaN	BSU00260	yaaN			smf	etfA	citM
														yfhC				cccA	BSU25190	cccA			flgE		flgE			yuiD	pdp	araD
														opuE				yrbE	BSU27770	yrbE			pstC	BSU24980	pstC			ywfC	gntP	yonE
														ycxC				odhB	BSU19360	odhB			citZ	BSU29140	citZ			xpaC	treP	ytlI
														ybcM				odhA		odhA			yisY	BSU10900	yisY			yxiS	ldh	ycbO
														leuB				gntK	BSU40060	gntK			yezB		yezB			ydaT	yfhD	yonK
														nin				sucC	BSU16090	sucC			sucC	BSU16090	sucC			citT	icd	yvdJ
														alsS				rocB	BSU37770	rocB			yfkC	BSU07940	yfkC			yqjE	oppA	yveN
														yitJ				csbD	BSU36670	csbD			glpK	BSU09290	glpK			yckB	yoxC	ywdC
														yqaS				citZ	BSU29140	citZ			ywdA	BSU38030	ywdA			pyrE	cydA	yukJ
														ybcH				yugN	BSU31330	yugN			glpQ	BSU02130	glpQ			fnr	ytiA	phrC
														yodC				acuC	BSU29710	acuC			rocE	BSU40330	rocE			pyrAB	ykrS	dctR
														yezD				ykzI	BSU14660	ykzI			purQ	BSU06470	purQ			bmrU	glpD	yhaX
														ybcD				galT	BSU38190	galT			ilvH	BSU28300	ilvH			ywdK	ytxJ	xkdO
														yutK				ywjC	BSU37210	ywjC			yhfC	BSU10180	yhfC			yrhE	gspA	yvcA
														yqbM				ykgA	BSU13020	ykgA			gltC	BSU18460	gltC			ycdF	yflT	yjdB
														ydjE				mleA	BSU23550	mleA			ykoL	BSU13330	ykoL			hemA	ydaG	yonH
														yhcC				ytkA	BSU30660	ytkA			yomL	BSU21320	yomL			ytaB	rsbV	xkdW
														yjeA				yneN	BSU18010	yneN			ydcS	BSU04880	ydcS			ypuA	nhaX	yfiE
														yurP				ykuL	BSU14130	ykuL			hag	BSU35360	hag			ynaF	ykzA	xkdH
														yhjB				csbA	BSU35180	csbA			ywnJ	BSU36540	ywnJ			yjdG	ylbP	yugM
														coxA				gsiB	BSU04400	gsiB			ydhT		ydhT			pyrC	treA	ycgB
														sigE				ybaL		ybaL			ywjB	BSU37220	ywjB			yydJ	rsbX	ytcP
														yocN				mleN	BSU23560	mleN			ywqI	BSU36200	ywqI			ylqC	rsbW	yesL
														cotV				yerB	BSU06570	yerB			ytxJ	BSU29760	ytxJ			yhdN	yqhA	ypiF
														cgeA				pmi		pmi			yfhD	BSU08490	yfhD			fhuD	manR	iolH
														cwlD				dps	BSU30650	dps			csbC	BSU39810	csbC			hbs	manP	ycbR
														spoVAA				ytxG	BSU29780	ytxG			yoxC	BSU18510	yoxC			yxkO	manA	yisK
														ydfR				atpF	BSU36850	atpF			ywiE	BSU37240	ywiE			ycnK	yjdF	yrhP
														yesS				yfkM	BSU07850	yfkM			yxaI	BSU39960	yxaI			yjmF	yfmQ	iolI
														pta				atpA	BSU36830	atpA			yvdI		yvdI			spo0M	yfhC	araB
																		citB	BSU18000	citB			mleA	BSU23550	mleA			yozB	nagP	ydzA
																		acuB	BSU29700	acuB			yxnA	BSU40000	yxnA			ugtP	yjbD	spoIIIAC
																		atpG	BSU36820	atpG			etfB	BSU28530	etfB			csfB	bdbB	leuS
																		mdh	BSU29120	mdh			csbD	BSU36670	csbD			yisQ	sunA	yvgW
																		atpH	BSU36840	atpH			etfA	BSU28520	etfA			gudB	yodC	yckE
																		yurP		yurP			csbA	BSU35180	csbA			ycnI	yjeA	ssb
																		rbsR	BSU35910	rbsR			yqhB	BSU24750	yqhB			dppC	yoeB	yhcA
																		rbsB	BSU35960	rbsB			mleN	BSU23560	mleN			yezE	dctP	yurO
																		rbsD	BSU35930	rbsD			bdbB	BSU21440	bdbB			yeeG	etfB	opuE
																		rbsA	BSU35940	rbsA			dra		dra			lrpB	ywiE	ycxC
																		rbsC	BSU35950	rbsC			ydhM		ydhM			flgL	resA	ybcM
																		sacA	BSU38040	sacA			melA	BSU30300	melA			yxlH	nupC	leuB
																		fruK	BSU14390	fruK			nhaX	BSU09690	nhaX			ppaC	qcrA	nin
																		mtlD	BSU03990	mtlD			gntP	BSU40070	gntP			perR	acuA	alsS
																		ywdA	BSU38030	ywdA			nagP	BSU07700	nagP			yumC	yraO	yitJ
																		glpK	BSU09290	glpK			yflT	BSU07550	yflT			rpsR	yolJ	yqaS
																		mtlA	BSU03981	mtlA			yolJ	BSU21450	yolJ			rpsD	sunT	ybcH
																		rbsK	BSU35920	rbsK			ytiA		ytiA			yaaC	amyE	yezD
																		fruR	BSU14380	fruR			sdhB	BSU28430	sdhB			cheV	bofC	ybcD
																		pstS	BSU24990	pstS			sunT	BSU21470	sunT			rpsI	rocC	yutK
																		sspH	BSU08110	sspH			treR	BSU07820	treR			pucK	kdgT	yqbM
																		fruA	BSU14400	fruA			galT	BSU38190	galT			rplL	ywmA	ydjE
																		yqaD	BSU26360	yqaD			yqhA		yqhA			rpmA	kdgK	yhcC
																		glpT	BSU02140	glpT			odhB	BSU19360	odhB			rplT	rplF	yhjB
																		ykzE	BSU13510	ykzE			rsbX	BSU04740	rsbX			ypsB	yfiD	coxA
																		sdhC	BSU28450	sdhC			sdhA	BSU28440	sdhA			ydeR	yuxI	sigE
																		sacP	BSU38050	sacP			rsbW	BSU04720	rsbW			resE	hemC	yocN
																		kbl	BSU17000	kbl			ysbB	BSU28900	ysbB			resD	bdbA	cotV
																		sigB	BSU04730	sigB			odhA		odhA			resB	maeN	cgeA
																		spoIIIC		spoIIIC			nupC	BSU39410	nupC			resC	yhcB	cwlD
																		tdh	BSU16990	tdh			ybyB	BSU02110	ybyB			ansB	cspB	spoVAA
																		qcrC	BSU22540	qcrC			bdbA	BSU21460	bdbA			ydhP		ydfR
																		glpF	BSU09280	glpF			glpF	BSU09280	glpF			drm		yesS
																		araN	BSU28750	araN			acoA	BSU08060	acoA			ytxE
																		sdhB	BSU28430	sdhB			ndk	BSU22730	ndk			recO
																		glpQ	BSU02130	glpQ			ydaG	BSU04220	ydaG			narG
																		acoR	BSU08100	acoR			ywjC	BSU37210	ywjC			katE
																		sspO	BSU17990	sspO			rsbV	BSU04710	rsbV			ypwA
																		senS	BSU08810	senS			ysbA	BSU28910	ysbA			punA
																		yrpD	BSU26820	yrpD			gspA	BSU38430	gspA			ald
																		phoP	BSU29110	phoP			pdp	BSU39400	pdp			yoqX
																		yqzG	BSU24650	yqzG			yvdR	BSU34500	yvdR			mmsA
																		sdhA	BSU28440	sdhA			kipR	BSU04100	kipR			qoxB
																		ygaO	BSU08890	ygaO			yxiE	BSU39250	yxiE			yrkA
																		srfAA	BSU03480	srfAA			rpsC	BSU01220	rpsC			ysiA
																		atpB	BSU36870	atpB			yhaP		yhaP			dhaS
																		msmX	BSU38810	msmX			yobB	BSU18820	yobB			yhfD
																		iolC	BSU39740	iolC			alsD	BSU36000	alsD			yvsH
																		xylA	BSU17600	xylA			pmi		pmi			rpmGB
																		csbX	BSU27760	csbX			acuB	BSU29700	acuB			ybaR
																		acsA	BSU29680	acsA			acuC	BSU29710	acuC			ydaH
																		spoIIIAH	BSU24360	spoIIIAH			ysfE	BSU28700	ysfE			rpmF
																		atpD	BSU36810	atpD			acuA	BSU29690	acuA			yhbJ
																		gcvPA	BSU24560	gcvPA			acoR	BSU08100	acoR			leuD
																		atpI	BSU36880	atpI			sspH	BSU08110	sspH			yrvM
																		ydhS		ydhS			sacP	BSU38050	sacP			ydhB
																		atpC	BSU36800	atpC			gntZ	BSU40080	gntZ			rpmB
																		fbaB		fbaB			ccpC	BSU14140	ccpC			yvzC
																		pdhC	BSU14600	pdhC			araL	BSU28770	araL			aroE
																		lcfA	BSU28560	lcfA			ykuL	BSU14130	ykuL			yczH
																		etfA	BSU28520	etfA			yrbE	BSU27770	yrbE			ylaG
																		pdp	BSU39400	pdp			bofC	BSU27750	bofC			yqjL
																		gntP	BSU40070	gntP			msmX	BSU38810	msmX			ydgB
																		pdhB	BSU14590	pdhB			sacA	BSU38040	sacA			rpsT
																		yheN	BSU09660	yheN			yhaT		yhaT			yjhB
																		opuAC	BSU03000	opuAC			glpT	BSU02140	glpT			abrB
																		treP	BSU07800	treP			rocB	BSU37770	rocB			rplQ
																		ywzA	BSU38180	ywzA			kbl	BSU17000	kbl			yabR
																		yvaA	BSU33530	yvaA			yosB	BSU20180	yosB			ydgF
																		yoqZ	BSU20460	yoqZ			malL	BSU34560	malL			ctsR
																		cydC	BSU38740	cydC			xkdK	BSU12650	xkdK			yebC
																		yhzC	BSU10410	yhzC			xhlB	BSU12800	xhlB			efp
																		ldh	BSU03050	ldh			kdgA	BSU22100	kdgA			sspE
																		ydaS	BSU04370	ydaS			csbX	BSU27760	csbX			gltP
																		yxzF	BSU38610	yxzF			xepA	BSU12780	xepA			yqeY
																		phrK	BSU18920	phrK			yocF		yocF			rpsO
																		cydB	BSU38750	cydB			acsA	BSU29680	acsA			ykoA
																		ywmE	BSU36720	ywmE			xtmB	BSU12580	xtmB			ywrK
																		mcsA	BSU00840	mcsA			yvfM		yvfM			yusG
																		yuaI	BSU31000	yuaI			sspO	BSU17990	sspO			smpB
																		mcsB	BSU00850	mcsB			xkdN	BSU12671	xkdN			yccG
																		ydaD	BSU04190	ydaD			yosJ	BSU20100	yosJ			yfjT
																		yfhD	BSU08490	yfhD			qcrB	BSU22550	qcrB			yceJ
																		yjcG	BSU11850	yjcG			yqaD	BSU26360	yqaD			fabF
																		yfkJ	BSU07880	yfkJ			lacA		lacA			yuzG
																		gutR	BSU06140	gutR			qcrC	BSU22540	qcrC			yutF
																		gtaB	BSU35670	gtaB			yvfL		yvfL			yuiF
																		ydhK	BSU05790	ydhK			senS	BSU08810	senS			ahpF
																		icd	BSU29130	icd			yesM	BSU06950	yesM			frr
																		mrgA	BSU32990	mrgA			yxjC	BSU39000	yxjC			ftsH
																		oppA	BSU11430	oppA			yoqF	BSU20650	yoqF			cspC
																		ctc	BSU00520	ctc			yocG		yocG			yodJ
																		yebE	BSU06400	yebE			yqcK	BSU25800	yqcK			mntH
																		spo0E	BSU13640	spo0E			xkdT	BSU12730	xkdT
																		ytzE	BSU30020	ytzE			abfA	BSU28720	abfA
																		yuaF	BSU31020	yuaF			xkdV	BSU12750	xkdV
																		mrpB	BSU31610	mrpB			yesN	BSU06960	yesN
																		ydbD	BSU04430	ydbD			fabHB	BSU10170	fabHB
																		yoxC	BSU18510	yoxC			yxeI	BSU39540	yxeI
																		cydA	BSU38760	cydA			yoqS	BSU20530	yoqS
																		smf		smf			yomZ	BSU21170	yomZ
																		yuiD	BSU32060	yuiD			hxlA	BSU03460	hxlA
																		ywfC		ywfC			sacB	BSU34450	sacB
																		ytiA		ytiA			ydhN		ydhN
																		xpaC	BSU00250	xpaC			yfiH	BSU08270	yfiH
																		yxiS	BSU39040	yxiS			yqkK	BSU23540	yqkK
																		ykrS		ykrS			yraO	BSU26860	yraO
																		ydaT	BSU04380	ydaT			yugN	BSU31330	yugN
																		citT	BSU07590	citT			ywsA	BSU35980	ywsA
																		glpD	BSU09300	glpD			lcfA	BSU28560	lcfA
																		yqjE	BSU23910	yqjE			xsa	BSU28510	xsa
																		yckB	BSU03380	yckB			spoIIIAH	BSU24360	spoIIIAH
																		pyrE	BSU15560	pyrE			yfmN	BSU07410	yfmN
																		ytxJ	BSU29760	ytxJ			ypzC	BSU23320	ypzC
																		fnr	BSU37310	fnr			yosD	BSU20160	yosD
																		pyrAB		pyrAB			xkdX	BSU12770	xkdX
																		gspA	BSU38430	gspA			ykzA		ykzA
																		yflT	BSU07550	yflT			ykuN	BSU14150	ykuN
																		ydaG	BSU04220	ydaG			ykzE	BSU13510	ykzE
																		rsbV	BSU04710	rsbV			ydhS		ydhS
																		nhaX	BSU09690	nhaX			amyE	BSU03040	amyE
																		ykzA		ykzA			hutH	BSU39350	hutH
																		ylbP	BSU15100	ylbP			kdgT	BSU22090	kdgT
																		treA	BSU07810	treA			yteQ		yteQ
																		rsbX	BSU04740	rsbX			ctaD	BSU14900	ctaD
																		rsbW	BSU04720	rsbW			yuxI		yuxI
																		yqhA		yqhA			yomT	BSU21230	yomT
																		bmrU	BSU24000	bmrU			dctB	BSU04440	dctB
																		ywdK	BSU37930	ywdK			yopY	BSU20720	yopY
																		yrhE	BSU27220	yrhE			tyrZ	BSU38460	tyrZ
																		ycdF	BSU02830	ycdF			yqzG	BSU24650	yqzG
																		hemA	BSU28170	hemA			kdgK	BSU22110	kdgK
																		ytaB	BSU30930	ytaB			citM	BSU07610	citM
																		ypuA	BSU23370	ypuA			araD	BSU28780	araD
																		manR	BSU12000	manR			yonE	BSU21120	yonE
																		manP	BSU12010	manP			ytlI	BSU29400	ytlI
																		manA	BSU12020	manA			ycbO	BSU02580	ycbO
																		ynaF	BSU17540	ynaF			yonK	BSU21060	yonK
																		yjdF	BSU12030	yjdF			yvdJ	BSU34580	yvdJ
																		yjdG	BSU12040	yjdG			rocC	BSU37760	rocC
																		pyrC	BSU15500	pyrC			yveN		yveN
																		yydJ	BSU40140	yydJ			ycsA	BSU04000	ycsA
																		yfmQ	BSU07380	yfmQ			ywdC		ywdC
																		ylqC	BSU16000	ylqC			pel	BSU07560	pel
																		yfhC	BSU08480	yfhC			yukJ	BSU31945	yukJ
																		nagP	BSU02350	nagP			phrC	BSU03780	phrC
																		yhdN	BSU09530	yhdN			mtlR	BSU04160	mtlR
																		fhuD	BSU33320	fhuD			dctR	BSU04460	dctR
																		hbs	BSU22790	hbs			yhaX	BSU09830	yhaX
																		yxkO	BSU38720	yxkO			xkdO	BSU12680	xkdO
																		ycnK	BSU03960	ycnK			yvcA	BSU34850	yvcA
																		yjmF	BSU12350	yjmF			yulD	BSU31190	yulD
																		yjbD		yjbD			cstA	BSU28710	cstA
																		spo0M	BSU08760	spo0M			yjdB	BSU11990	yjdB
																		bdbB	BSU21440	bdbB			yonH	BSU21090	yonH
																		yozB	BSU19140	yozB			xkdW	BSU12760	xkdW
																		ugtP	BSU21920	ugtP			yfiE		yfiE
																		csfB	BSU00240	csfB			xkdH	BSU12620	xkdH
																		yisQ	BSU10820	yisQ			iolC	BSU39740	iolC
																		sunA	BSU21480	sunA			yugM	BSU31340	yugM
																		gudB	BSU22960	gudB			ycgB	BSU03030	ycgB
																		yodC	BSU19550	yodC			ygaO	BSU08890	ygaO
																		yjeA	BSU12100	yjeA			yhfW	BSU10390	yhfW
																		ycnI	BSU03940	ycnI			ytcP	BSU30170	ytcP
																		dppC	BSU12940	dppC			yesL	BSU06940	yesL
																		yezE	BSU06860	yezE			ypiF	BSU22570	ypiF
																		yoeB		yoeB			iolH	BSU39690	iolH
																		yeeG	BSU06820	yeeG			ywmA	BSU36790	ywmA
																		lrpB	BSU05060	lrpB			yfiD		yfiD
																		flgL	BSU35400	flgL			ycbR	BSU02610	ycbR
																		yxlH	BSU38640	yxlH			yisK	BSU10750	yisK
																		ppaC	BSU40550	ppaC			yrhP	BSU27100	yrhP
																		perR	BSU08730	perR			iolI	BSU39680	iolI
																		yumC	BSU32110	yumC			araB	BSU28790	araB
																		rpsR	BSU40890	rpsR			ydzA	BSU04240	ydzA
																		rpsD	BSU29660	rpsD			fbaB		fbaB
																		yaaC	BSU00080	yaaC			yhaS		yhaS
																		cheV	BSU14010	cheV			spoIIIAC	BSU24410	spoIIIAC
																		rpsI	BSU01500	rpsI			leuS	BSU30320	leuS
																		pucK	BSU32440	pucK			yvgW		yvgW
																		rplL	BSU01050	rplL			yckE		yckE
																		rpmA	BSU27940	rpmA			yhcB	BSU09020	yhcB
																		rplT	BSU28850	rplT			yjbD		yjbD
																		ypsB	BSU22180	ypsB			ssb		ssb
																		ydeR	BSU05310	ydeR			yhcA	BSU09010	yhcA
																		dctP	BSU04470	dctP			yurO		yurO
																		resE	BSU23110	resE			yfhC	BSU08480	yfhC
																		resD	BSU23120	resD			opuE	BSU06660	opuE
																		etfB	BSU28530	etfB			ycxC	BSU03550	ycxC
																		ywiE	BSU37240	ywiE			ybcM	BSU01900	ybcM
																		resB	BSU23140	resB			leuB	BSU28270	leuB
																		resA	BSU23150	resA			nin	BSU03420	nin
																		resC	BSU23130	resC			alsS	BSU36010	alsS
																		ansB		ansB			yitJ	BSU11010	yitJ
																		nupC	BSU39410	nupC			yqaS	BSU26200	yqaS
																		qcrA	BSU22560	qcrA			ybcH	BSU01870	ybcH
																		acuA	BSU29690	acuA			yodC	BSU19550	yodC
																		yraO	BSU26860	yraO			yezD	BSU07190	yezD
																		yolJ	BSU21450	yolJ			ybcD		ybcD
																		ydhP		ydhP			yutK	BSU32180	yutK
																		sunT	BSU21470	sunT			yqbM	BSU26060	yqbM
																		drm	BSU23500	drm			ydjE	BSU06170	ydjE
																		ytxE	BSU29720	ytxE			yhcC	BSU09030	yhcC
																		amyE	BSU03040	amyE			yjeA	BSU12100	yjeA
																		recO	BSU25280	recO			yurP		yurP
																		narG	BSU37280	narG			yhjB	BSU10450	yhjB
																		katE	BSU39050	katE			coxA	BSU27830	coxA
																		bofC	BSU27750	bofC			sigE	BSU15320	sigE
																		rocC	BSU37760	rocC			yocN	BSU19280	yocN
																		kdgT	BSU22090	kdgT			cotV	BSU11780	cotV
																		ypwA	BSU22080	ypwA			cgeA	BSU19780	cgeA
																		ywmA	BSU36790	ywmA			cwlD	BSU01530	cwlD
																		punA		punA			spoVAA	BSU23440	spoVAA
																		ald	BSU31930	ald			ydfR	BSU05530	ydfR
																		yoqX	BSU20480	yoqX			yesS	BSU07010	yesS
																		kdgK	BSU22110	kdgK			pta		pta
																		rplF	BSU01310	rplF
																		mmsA	BSU39760	mmsA
																		qoxB	BSU38160	qoxB
																		yfiD		yfiD
																		yrkA	BSU26610	yrkA
																		ysiA		ysiA
																		yuxI		yuxI
																		hemC	BSU28150	hemC
																		bdbA	BSU21460	bdbA
																		dhaS	BSU19310	dhaS
																		yhfD		yhfD
																		yvsH		yvsH
																		rpmGB		rpmGB
																		ybaR	BSU01580	ybaR
																		ydaH	BSU04230	ydaH
																		rpmF	BSU15080	rpmF
																		yhbJ	BSU09000	yhbJ
																		leuD	BSU28250	leuD
																		yrvM	BSU27540	yrvM
																		ydhB	BSU05690	ydhB
																		rpmB	BSU15820	rpmB
																		yvzC	BSU33650	yvzC
																		aroE	BSU25660	aroE
																		yczH	BSU04020	yczH
																		ylaG		ylaG
																		yqjL	BSU23830	yqjL
																		ydgB	BSU05570	ydgB
																		rpsT	BSU25550	rpsT
																		yjhB	BSU12190	yjhB
																		abrB	BSU00370	abrB
																		rplQ	BSU01440	rplQ
																		yabR	BSU00630	yabR
																		maeN	BSU31580	maeN
																		ydgF	BSU05620	ydgF
																		yhcB	BSU09020	yhcB
																		ctsR	BSU00830	ctsR
																		yebC	BSU06380	yebC
																		efp	BSU24450	efp
																		sspE	BSU08660	sspE
																		gltP	BSU02340	gltP
																		yqeY	BSU25400	yqeY
																		rpsO	BSU16680	rpsO
																		ykoA	BSU14420	ykoA
																		ywrK	BSU36030	ywrK
																		yusG	BSU32790	yusG
																		smpB	BSU33600	smpB
																		yccG		yccG
																		yfjT	BSU07970	yfjT
																		yceJ	BSU02960	yceJ
																		fabF	BSU11340	fabF
																		cspB	BSU09100	cspB
																		yuzG	BSU32120	yuzG
																		yutF	BSU32290	yutF
																		yuiF	BSU32040	yuiF
																		ahpF	BSU40100	ahpF
																		frr	BSU16520	frr
																		ftsH	BSU00690	ftsH
																		cspC	BSU05120	cspC
																		yodJ	BSU19620	yodJ
																		mntH	BSU04360	mntH

## Sheet: 6_LB_Regulatory_groups
Genes with fold change >1.7 (from sheet 4) are grouped into three classes; only affected in the DELTAccpA strain, affected in both DELTAccpA and in CcpA-mutant strain, and only affected in the CcpA-mutant strain.
Shown here are the fold changes in gene expression when the CcpA-mutant strains were grown in LB without glucose
Locus tag	Gene	DELTAccpA	CcpA-M17R		Locus tag	Gene	DELTAccpA	CcpA-T62H		Locus tag	Gene	DELTAccpA	CcpA-R304W
BSU03990	mtlD	13.8756			BSU03981	mtlA	16.1996			BSU03050	ldh	23.2962
BSU04530	ydbN	6.98854			BSU03990	mtlD	13.8756			BSU03981	mtlA	16.1996
BSU24990	pstS	6.58956			BSU04530	ydbN	6.98854			BSU04530	ydbN	6.98854
BSU35310	yvyD	5.06736			BSU24990	pstS	6.58956			BSU24990	pstS	6.58956
BSU35970	ywsB	3.45747			BSU40340	rocD	5.13458			BSU35310	yvyD	5.06736
BSU07380	yfmQ	3.42668			BSU35310	yvyD	5.06736			BSU07380	yfmQ	3.42668
BSU03490	srfAB	3.31549			BSU37790	rocG	4.59652			BSU03490	srfAB	3.31549
BSU23150	resA	3.01184			BSU07380	yfmQ	3.42668			BSU03480	srfAA	3.17961
BSU35950	rbsC	2.95632			BSU03490	srfAB	3.31549			BSU23150	resA	3.01184
BSU38760	cydA	2.93666			BSU18000	citB	3.25548			BSU38760	cydA	2.93666
BSU13340	ykoM	2.81902			BSU03480	srfAA	3.17961			BSU03500	comS	2.63689
BSU18010	yneN	2.65001			BSU23150	resA	3.01184			BSU21480	sunA	2.6144
BSU03500	comS	2.63689			BSU38760	cydA	2.93666			BSU03510	srfAC	2.27378
BSU21480	sunA	2.6144			BSU18010	yneN	2.65001			BSU04470	dctP	2.20459
BSU29110	phoP	2.61101			BSU03500	comS	2.63689			BSU39340	hutP	2.19225
BSU14160	ykuO	2.3978			BSU29110	phoP	2.61101			BSU14870	ctaA	2.18165
BSU22560	qcrA	2.30073			BSU14160	ykuO	2.3978			BSU16980	spoVS	2.14311
BSU03510	srfAC	2.27378			BSU22560	qcrA	2.30073			BSU33950	cggR	2.12989
BSU04470	dctP	2.20459			BSU03510	srfAC	2.27378			BSU14660	ykzI	2.06886
BSU39340	hutP	2.19225			BSU39340	hutP	2.19225			BSU35920	rbsK	2.05109
BSU14870	ctaA	2.18165			BSU14870	ctaA	2.18165			BSU00490	spoVG	2.0373
BSU16100	sucD	2.18147			BSU16980	spoVS	2.14311			BSU15900	fabD	2.01575
BSU16980	spoVS	2.14311			BSU33950	cggR	2.12989			BSU10130	hemH	1.94353
BSU25190	cccA	2.07583			BSU16990	tdh	2.04027			BSU05130	ydeB	1.81706
BSU14660	ykzI	2.06886			BSU00490	spoVG	2.0373			BSU11430	oppA	1.79837
BSU16990	tdh	2.04027			BSU15100	ylbP	2.02978			BSU18110	ynfC	1.75114
BSU00490	spoVG	2.0373			BSU15900	fabD	2.01575			BSU06580	yerC	1.74659
BSU15100	ylbP	2.02978			BSU10130	hemH	1.94353			BSU08610	yfhO	-1.71851
BSU15900	fabD	2.01575			BSU05130	ydeB	1.81706			BSU15470	pyrR	-1.7247
BSU10130	hemH	1.94353			BSU11430	oppA	1.79837			BSU36760	murAA	-1.75268
BSU05130	ydeB	1.81706			BSU26820	yrpD	1.77619			BSU22500	ypjD	-1.81434
BSU11430	oppA	1.79837			BSU18110	ynfC	1.75114			BSU12990	ykfC	-1.89366
BSU30660	ytkA	1.7818			BSU06580	yerC	1.74659			BSU16950	pbpX	-1.89472
BSU26820	yrpD	1.77619			BSU08610	yfhO	-1.71851			BSU30260	msmR	-1.9031
BSU18110	ynfC	1.75114			BSU36760	murAA	-1.75268			BSU30270	msmE	-1.96747
BSU06580	yerC	1.74659			BSU22500	ypjD	-1.81434			BSU39200	yxzC	-2.0152
BSU08610	yfhO	-1.71851			BSU12990	ykfC	-1.89366			BSU25680	yqeG	-2.02446
BSU15470	pyrR	-1.7247			BSU16950	pbpX	-1.89472			BSU39230	wapA	-2.13553
BSU36760	murAA	-1.75268			BSU30270	msmE	-1.96747			BSU39220	yxxG	-2.31012
BSU22500	ypjD	-1.81434			BSU39200	yxzC	-2.0152			BSU00270	yaaO	-2.3538
BSU12990	ykfC	-1.89366			BSU25680	yqeG	-2.02446			BSU38590	licB	-2.37081
BSU16950	pbpX	-1.89472			BSU39230	wapA	-2.13553			BSU39260	bglH	-2.42509
BSU30270	msmE	-1.96747			BSU39220	yxxG	-2.31012			BSU35260	ftsE	-2.48212
BSU39200	yxzC	-2.0152			BSU00270	yaaO	-2.3538			BSU07800	treP	-2.5365
BSU25680	yqeG	-2.02446			BSU35260	ftsE	-2.48212			BSU29470	ackA	-2.60082
BSU39230	wapA	-2.13553			BSU29470	ackA	-2.60082			BSU39270	bglP	-2.70354
BSU31580	maeN	-2.17099			BSU12000	manR	-5.45893			BSU07810	treA	-2.94796
BSU39220	yxxG	-2.31012			BSU29740	ccpA	-7.51823			BSU40060	gntK	-3.00794
BSU00270	yaaO	-2.3538			BSU12010	manP	-10.1798			BSU38570	licA	-3.24969
BSU38590	licB	-2.37081			BSU03050	ldh	23.2962	9.06044		BSU38580	licC	-3.37206
BSU39260	bglH	-2.42509			BSU37780	rocA	9.11007	-2.21069		BSU38560	licH	-3.45663
BSU35260	ftsE	-2.48212			BSU35930	rbsD	3.48162	-10.7763		BSU23580	ansA	-4.13026
BSU07800	treP	-2.5365			BSU35970	ywsB	3.45747	-3.45314		BSU09300	glpD	-5.02307
BSU29470	ackA	-2.60082			BSU35950	rbsC	2.95632	-4.98219		BSU29740	ccpA	-7.51823
BSU39270	bglP	-2.70354			BSU35940	rbsA	2.83224	-6.93263		BSU03990	mtlD	13.8756	2.92936
BSU07810	treA	-2.94796			BSU13340	ykoM	2.81902	-3.20258		BSU37780	rocA	9.11007	5.35275
BSU40060	gntK	-3.00794			BSU35960	rbsB	2.72965	-12.4148		BSU40340	rocD	5.13458	5.78415
BSU38580	licC	-3.37206			BSU21480	sunA	2.6144	-2.27038		BSU37790	rocG	4.59652	8.10327
BSU23580	ansA	-4.13026			BSU35910	rbsR	2.30907	-9.21097		BSU35930	rbsD	3.48162	3.30923
BSU29740	ccpA	-7.51823			BSU06560	yerA	2.28986	-2.7557		BSU35970	ywsB	3.45747	5.75277
BSU03050	ldh	23.2962	4.02139		BSU04470	dctP	2.20459	-2.78403		BSU18000	citB	3.25548	2.83816
BSU03981	mtlA	16.1996	2.43525		BSU16100	sucD	2.18147	-1.98642		BSU35950	rbsC	2.95632	4.09375
BSU37780	rocA	9.11007	6.82819		BSU25190	cccA	2.07583	-1.97991		BSU35940	rbsA	2.83224	3.9088
BSU40340	rocD	5.13458	3.49347		BSU14660	ykzI	2.06886	-2.47334		BSU13340	ykoM	2.81902	2.27022
BSU37790	rocG	4.59652	9.13621		BSU35920	rbsK	2.05109	-2.80296		BSU35960	rbsB	2.72965	4.3901
BSU35930	rbsD	3.48162	-3.42318		BSU30660	ytkA	1.7818	-2.59391		BSU18010	yneN	2.65001	3.14361
BSU18000	citB	3.25548	2.26726		BSU15470	pyrR	-1.7247	-1.92673		BSU29110	phoP	2.61101	2.29409
BSU03480	srfAA	3.17961	1.96199		BSU30260	msmR	-1.9031	-3.81883		BSU14160	ykuO	2.3978	1.95453
BSU35940	rbsA	2.83224	-3.84517		BSU31580	maeN	-2.17099	-2.19201		BSU35910	rbsR	2.30907	2.82413
BSU35960	rbsB	2.72965	-3.96805		BSU38590	licB	-2.37081	-3.44099		BSU22560	qcrA	2.30073	2.10385
BSU35910	rbsR	2.30907	-3.1891		BSU39260	bglH	-2.42509	-7.88591		BSU06560	yerA	2.28986	2.69926
BSU06560	yerA	2.28986	1.74818		BSU07800	treP	-2.5365	-6.25191		BSU16100	sucD	2.18147	1.74819
BSU33950	cggR	2.12989	2.00099		BSU39270	bglP	-2.70354	-4.39389		BSU25190	cccA	2.07583	3.15481
BSU35920	rbsK	2.05109	-1.94795		BSU07810	treA	-2.94796	-5.31153		BSU16990	tdh	2.04027	4.5802
BSU30260	msmR	-1.9031	-1.87381		BSU40060	gntK	-3.00794	-3.33436		BSU15100	ylbP	2.02978	2.15069
BSU38570	licA	-3.24969	-2.59373		BSU38570	licA	-3.24969	-3.97362		BSU30660	ytkA	1.7818	1.70483
BSU38560	licH	-3.45663	-3.66419		BSU38580	licC	-3.37206	-2.94553		BSU26820	yrpD	1.77619	1.71141
BSU09300	glpD	-5.02307	-2.48545		BSU38560	licH	-3.45663	-3.02814		BSU31580	maeN	-2.17099	-2.34165
BSU12000	manR	-5.45893	-7.60563		BSU23580	ansA	-4.13026	-1.85715		BSU12000	manR	-5.45893	-4.54463
BSU40120	yyzE	-5.73226	-1.81904		BSU09300	glpD	-5.02307	-6.94659		BSU40120	yyzE	-5.73226	-2.61911
BSU40110	bglA	-6.67441	-2.40615		BSU40120	yyzE	-5.73226	-4.19953		BSU40110	bglA	-6.67441	-2.77485
BSU12010	manP	-10.1798	-7.09959		BSU40110	bglA	-6.67441	-8.05073		BSU12010	manP	-10.1798	-13.804
BSU12020	manA	-10.959	-12.1053		BSU12020	manA	-10.959	-3.38746		BSU12020	manA	-10.959	-13.4592
BSU12030	yjdF	-17.1403	-14.4788		BSU12030	yjdF	-17.1403	-3.58453		BSU12030	yjdF	-17.1403	-1.78849
BSU29140	citZ		4.79095		BSU18820	yobB		2.81699		BSU02140	glpT		8.92458
BSU10900	yisY		3.51507		BSU06470	purQ		2.69006		BSU37770	rocB		6.39372
BSU29120	mdh		2.85596		BSU28300	ilvH		2.67247		BSU17000	kbl		5.14511
BSU33920	tpiA		2.66355		BSU10180	yhfC		2.58384		BSU08110	sspH		4.94379
BSU40330	rocE		2.40668		BSU18460	gltC		2.24559		BSU40330	rocE		4.47098
BSU34050	yvfV		2.4022		BSU13330	ykoL		2.03192		BSU08100	acoR		3.74863
BSU16090	sucC		2.324		BSU21320	yomL		2.00084		BSU20180	yosB		3.584
BSU29130	icd		2.22909		BSU04880	ydcS		1.9932		BSU34560	malL		3.46888
BSU07940	yfkC		2.12617		BSU35360	hag		1.76572		BSU14130	ykuL		3.38873
BSU01420	rpsK		2.08862		BSU36000	alsD		1.73983		BSU12650	xkdK		3.36911
BSU25270	glyQ		2.06193		BSU36540	ywnJ		1.70305		BSU12800	xhlB		3.21582
BSU33910	pgm		1.99434		BSU37220	ywjB		-1.71948		BSU22100	kdgA		3.21255
BSU33930	pgk		1.97912		BSU36200	ywqI		-1.7299		BSU27760	csbX		3.18944
BSU16310	fliM		1.95478		BSU29760	ytxJ		-1.73103		BSU02130	glpQ		3.14987
BSU15110	ylbQ		1.94755		BSU29700	acuB		-1.73451		BSU12780	xepA		3.00455
BSU35150	yvzB		1.93915		BSU29710	acuC		-1.76115		BSU29680	acsA		2.8861
BSU28150	hemC		1.90339		BSU08490	yfhD		-1.78216		BSU12580	xtmB		2.86971
BSU31350	pgi		1.89129		BSU39810	csbC		-1.81667		BSU17990	sspO		2.81626
BSU01280	rplE		1.81159		BSU18510	yoxC		-1.82292		BSU12671	xkdN		2.73925
BSU01200	rpsS		1.81104		BSU37240	ywiE		-1.84352		BSU20100	yosJ		2.73012
BSU14600	pdhC		1.77381		BSU16090	sucC		-1.854		BSU22550	qcrB		2.70759
BSU01310	rplF		1.76664		BSU39960	yxaI		-1.85418		BSU26360	yqaD		2.70124
BSU11460	oppD		1.73654		BSU28700	ysfE		-1.89311		BSU27770	yrbE		2.69091
BSU35630	lytB		1.72477		BSU29690	acuA		-1.91378		BSU22540	qcrC		2.61511
BSU00110	yaaD		1.72082		BSU23550	mleA		-1.92047		BSU08810	senS		2.59818
BSU06250	ydjM		-1.7658		BSU40000	yxnA		-1.93059		BSU06950	yesM		2.58681
BSU09100	cspB		-1.76979		BSU28530	etfB		-1.95354		BSU39000	yxjC		2.58507
BSU05100	yddT		-1.7706		BSU36670	csbD		-1.95629		BSU20650	yoqF		2.57677
BSU40580	yybN		-1.81904		BSU28520	etfA		-1.98252		BSU38030	ywdA		2.53432
BSU00100	dacA		-1.87144		BSU35180	csbA		-1.99446		BSU29700	acuB		2.5219
BSU09270	glpP		-1.88122		BSU08100	acoR		-1.99584		BSU38040	sacA		2.44635
BSU38030	ywdA		-1.8849		BSU24750	yqhB		-2.02944		BSU38050	sacP		2.40937
BSU01630	feuA		-1.94984		BSU23560	mleN		-2.06385		BSU25800	yqcK		2.35969
BSU05390	ydfF		-1.98181		BSU21440	bdbB		-2.07785		BSU12730	xkdT		2.32709
BSU00260	yaaN		-2.13971		BSU30300	melA		-2.11785		BSU28720	abfA		2.31917
BSU02130	glpQ		-2.32386		BSU09690	nhaX		-2.11787		BSU12750	xkdV		2.3145
BSU09290	glpK		-2.9947		BSU08110	sspH		-2.17343		BSU06960	yesN		2.31079
BSU24980	pstC		-4.05336		BSU38050	sacP		-2.20324		BSU10170	fabHB		2.25909
					BSU40070	gntP		-2.2297		BSU39540	yxeI		2.23882
					BSU40080	gntZ		-2.24974		BSU20530	yoqS		2.23356
					BSU07700	nagP		-2.28091		BSU21170	yomZ		2.21438
					BSU07550	yflT		-2.32339		BSU03460	hxlA		2.21365
					BSU29140	citZ		-2.33594		BSU34450	sacB		2.21055
					BSU21450	yolJ		-2.3478		BSU08270	yfiH		2.18329
					BSU14140	ccpC		-2.35859		BSU23540	yqkK		2.18172
					BSU28770	araL		-2.38704		BSU28770	araL		2.16328
					BSU28430	sdhB		-2.43695		BSU26860	yraO		2.13252
					BSU21470	sunT		-2.47687		BSU31330	yugN		2.13218
					BSU07820	treR		-2.49999		BSU29710	acuC		2.12736
					BSU38190	galT		-2.55405		BSU35980	ywsA		2.12436
					BSU19360	odhB		-2.56886		BSU28560	lcfA		2.12025
					BSU04740	rsbX		-2.60005		BSU28510	xsa		2.1136
					BSU14130	ykuL		-2.60844		BSU24360	spoIIIAH		2.10248
					BSU28440	sdhA		-2.61567		BSU29690	acuA		2.10183
					BSU04720	rsbW		-2.6602		BSU07410	yfmN		2.08669
					BSU28900	ysbB		-2.86034		BSU23320	ypzC		2.08121
					BSU39410	nupC		-2.8906		BSU20160	yosD		2.06573
					BSU27770	yrbE		-3.01628		BSU12770	xkdX		2.05384
					BSU02110	ybyB		-3.03711		BSU14150	ykuN		2.02967
					BSU21460	bdbA		-3.15706		BSU13510	ykzE		2.02897
					BSU09280	glpF		-3.16279		BSU03040	amyE		2.01926
					BSU08060	acoA		-3.17276		BSU39350	hutH		2.01292
					BSU22730	ndk		-3.17919		BSU22090	kdgT		2.00042
					BSU04220	ydaG		-3.23329		BSU14900	ctaD		1.99456
					BSU37210	ywjC		-3.59136		BSU21230	yomT		1.96696
					BSU04710	rsbV		-3.60463		BSU04440	dctB		1.94898
					BSU28910	ysbA		-3.62262		BSU20720	yopY		1.94426
					BSU38430	gspA		-3.75209		BSU38460	tyrZ		1.93781
					BSU39400	pdp		-3.97961		BSU24650	yqzG		1.92488
					BSU27750	bofC		-3.99228		BSU22110	kdgK		1.91138
					BSU38810	msmX		-4.00064		BSU07610	citM		1.91025
					BSU34500	yvdR		-4.16227		BSU28780	araD		1.90975
					BSU04100	kipR		-4.45672		BSU21120	yonE		1.90041
					BSU02130	glpQ		-4.55064		BSU29400	ytlI		1.89285
					BSU07940	yfkC		-5.84909		BSU02580	ycbO		1.88967
					BSU39250	yxiE		-6.11362		BSU21060	yonK		1.8875
					BSU09290	glpK		-6.64226		BSU34580	yvdJ		1.87979
					BSU38040	sacA		-8.61872		BSU37760	rocC		1.8755
					BSU38030	ywdA		-9.96062		BSU04000	ycsA		1.87094
					BSU10900	yisY		-20.3929		BSU38810	msmX		1.86689
					BSU01220	rpsC		-20.8884		BSU07560	pel		1.86564
										BSU31945	yukJ		1.86475
										BSU03780	phrC		1.86072
										BSU04160	mtlR		1.8593
										BSU04460	dctR		1.85867
										BSU09830	yhaX		1.85553
										BSU12680	xkdO		1.84909
										BSU34850	yvcA		1.84719
										BSU31190	yulD		1.84501
										BSU28710	cstA		1.84399
										BSU11990	yjdB		1.84378
										BSU21090	yonH		1.84372
										BSU12760	xkdW		1.84048
										BSU12620	xkdH		1.83574
										BSU39740	iolC		1.82584
										BSU31340	yugM		1.82398
										BSU03030	ycgB		1.81195
										BSU27750	bofC		1.79747
										BSU08890	ygaO		1.78173
										BSU10390	yhfW		1.77941
										BSU30170	ytcP		1.76742
										BSU06940	yesL		1.76436
										BSU22570	ypiF		1.7603
										BSU39690	iolH		1.75568
										BSU36790	ywmA		1.75455
										BSU02610	ycbR		1.74837
										BSU10750	yisK		1.74423
										BSU27100	yrhP		1.74181
										BSU14140	ccpC		1.73134
										BSU39680	iolI		1.72592
										BSU28790	araB		1.72586
										BSU04240	ydzA		1.71666
										BSU28700	ysfE		1.711
										BSU24410	spoIIIAC		-1.70326
										BSU30320	leuS		-1.71168
										BSU09020	yhcB		-1.73268
										BSU40080	gntZ		-1.73486
										BSU09010	yhcA		-1.74651
										BSU08480	yfhC		-1.75412
										BSU06660	opuE		-1.76187
										BSU03550	ycxC		-1.76535
										BSU01900	ybcM		-1.77628
										BSU28270	leuB		-1.77913
										BSU03420	nin		-1.78198
										BSU36010	alsS		-1.82986
										BSU11010	yitJ		-1.83586
										BSU26200	yqaS		-1.85302
										BSU01870	ybcH		-1.86961
										BSU19550	yodC		-1.88472
										BSU07190	yezD		-1.89123
										BSU32180	yutK		-1.9127
										BSU26060	yqbM		-1.94575
										BSU06170	ydjE		-1.9725
										BSU09030	yhcC		-1.97999
										BSU12100	yjeA		-1.984
										BSU10450	yhjB		-2.09769
										BSU36000	alsD		-2.10388
										BSU27830	coxA		-2.18545
										BSU15320	sigE		-2.22651
										BSU18820	yobB		-2.2343
										BSU19280	yocN		-2.25388
										BSU11780	cotV		-2.27244
										BSU19780	cgeA		-2.31842
										BSU01530	cwlD		-2.40548
										BSU23440	spoVAA		-2.44385
										BSU05530	ydfR		-2.60376
										BSU07010	yesS		-2.7998

## Sheet: 7_LBgluc_CRE-TSSdistance
This table is derived from figure in Marciniak et al. 2012 BMC genomics. To see if there is a correlation between the fold change in gene expression in the microarray data and the CREtoTSS-distance.
adapted from: Marciniak et al. BMC Genomics 2012. cre box affinity for CcpA binding in B subtilis_addition5_CREdistance to TSS.pdf
Additional file 5. Regulated first genes of operons with cre sites. Start codon and further coding sequences are shown in lowercase and intergenic regions in uppercase.
Underlined – predicted cre boxes, bold – cre boxes known from the literature, solid box – promoter known from the literature, dotted box – predicted promoter, dark grey shadow - transcriptional start site (TSS) known from the literature, light grey shadow – predicted TSS.
							DELTAccpA	CcpA-M17R	CcpA-T62H	CcpA-R304W
					BSU27760	csbX	2.21648	1.69529		2.27366	-401
BSU28250	.				BSU06660	opuE					-103
BSU28260	.				BSU28310	ilvB					-88
BSU28270	.				BSU27070	levD					-45
BSU28280	.				BSU39270	bglP	2.30117			1.64027	-36
BSU28290	.				BSU25190	cccA	5.19388	2.07458		2.01299	-29
BSU28300	.				BSU30260	msmR					-28
BSU28310	BSU28310	ilvB	-88		BSU08100	acoR	3.52182			2.27604	-27
BSU29470	.				BSU09280	glpF	3.80996			4.00034	-27
BSU37660	.				BSU29690	acuA	1.54272	1.48699		2.0467	-26
BSU35490	.				BSU38760	cydA		1.78878			-21
BSU06660	BSU06660	opuE	-103		BSU38050	sacP	4.07463			4.93764	-19
BSU28810	BSU28810	abnA	85		BSU23500	drm	1.59307			1.98564	-16
BSU02130	.				BSU04160	mtlR	2.29474			1.46587	-16
BSU02140	.				BSU38810	msmX	2.6743			2.67785	-15
BSU03040	BSU03040	amyE	4		BSU04470	dctP				3.54589	-14
BSU03780	.				BSU16090	sucC	3.66263	3.65224		5.28445	0
BSU04470	BSU04470	dctP	-14		BSU12000	manR			7.8809		0
BSU04710	.				BSU03040	amyE				1.97183	4
BSU04720	.				BSU05810	gmuB					6
BSU04730	.				BSU08180	malA					6
BSU04740	.				BSU35910	rbsR	50.7601			13.9489	6
BSU05810	BSU05810	gmuB	6		BSU28510	abf2					7
BSU05820	.				BSU23560	mleN	2.34981	1.87022		3.29206	21
BSU05830	.				BSU28710	cstA	2.40597			1.47758	32
BSU05840	.				BSU37790	rocG	10.6305	3.85359		8.849	43
BSU05850	.				BSU10770	wprA	2.00226			1.6613	43
BSU05860	.				BSU29680	acsA	2.13911			2.03775	44
BSU05870	.				BSU07610	citM					46
BSU05880	.				BSU28810	abnA	2.12965				85
BSU06950	.				BSU29140	citZ	3.45693	4.43752		5.37427	88
BSU07560	.				BSU17600	xylA	2.31029			2.24309	144
BSU07610	BSU07610	citM	46		BSU40050	gntR					148	cre2
BSU07620	.				BSU39340	hutP	2.08281				209
BSU07800	BSU07800	treP	372		BSU17570	xynP					230
BSU07810	.				BSU07800	treP		2.78609		1.54521	372
BSU07820	.				BSU28560	lcfA	1.86081			2.34503	450
BSU07840	.				BSU08060	acoA					462
BSU08060	BSU08060	acoA	462		BSU12300	uxaC					1237
BSU08070	.				BSU23150	resA	1.63138	1.4597		2.168	1709	cre2
BSU08080	.				BSU39760	iolA				1.75905	2404	cre2
BSU08090	.				BSU22120	kdgR				1.64665	2445
BSU08100	BSU08100	acoR	-27		BSU12330	yjmD					ND
BSU08110	.				BSU34200	sigL	1.45881			1.59295	ND
BSU08180	BSU08180	malA	6		BSU28250	leuD				-1.71729
BSU08190	.				BSU28260	leuC	-2.03737
BSU08200	.				BSU28270	leuB
BSU09280	BSU09280	glpF	-27		BSU28280	leuA
BSU09290	.				BSU28290	ilvC	-3.19683			-1.5464
BSU09300	.				BSU28300	ilvH	-3.91665
BSU09880	.				BSU29470	ackA	-4.34903
BSU12300	BSU12300	uxaC	1237		BSU37660	pta
BSU12310	.				BSU35490	degU
BSU12320	.				BSU02130	glpQ	3.61233			1.91104
BSU12330	BSU12330	yjmD	ND		BSU02140	glpT	4.63099			4.48764
BSU12340	.				BSU03780	phrC	1.47358
BSU12350	.				BSU04710	rsbV		3.11023		3.23852
BSU12360	.				BSU04720	rsbW		2.54		2.17489
BSU12370	.				BSU04730	sigB	4.02743			2.45138
BSU12380	.				BSU04740	rsbX	1.69378	2.58898		1.82145
BSU12390	.				BSU05820	gmuA
BSU14040	.				BSU05830	gmuC
BSU14120	.				BSU05840	gmuD
BSU14130	.				BSU05850	gmuR
BSU14140	.				BSU05860	gmuE
BSU14890	.				BSU05870	gmuF
BSU15100	.				BSU05880	gmuG
BSU16090	BSU16090	sucC	0		BSU06950	yesM
BSU16100	.				BSU07560	pel	2.04566
BSU17570	BSU17570	xynP	230		BSU07620	yflN	1.53806			1.34192
BSU17580	.				BSU07810	treA		2.59804		1.74646
BSU17600	BSU17600	xylA	144		BSU07820	treR		1.52109		1.48002
BSU17610	.				BSU07840	yfkN
BSU18960	.				BSU08070	acoB
BSU19030	.				BSU08080	acoC
BSU19360	.				BSU08090	acoL
BSU19370	.				BSU08110	sspH	5.35156			1.74571
BSU19410	.				BSU08190	glvR
BSU20850	.				BSU08200	malP
BSU22090	.				BSU09290	glpK	10.5296	1.6843		5.13023
BSU22100	.				BSU09300	glpD		-1.79263
BSU22110	.				BSU09880	yhaR
BSU22120	BSU22120	kdgR	2445		BSU12310	yjmB
BSU22130	.				BSU12320	yjmC
BSU22140	.				BSU12340	uxuA
BSU22560	.				BSU12350	yjmF			-1.78909
BSU22570	.				BSU12360	exuT
BSU23110	.				BSU12370	exuR
BSU23120	.				BSU12380	uxaB
BSU23130	.				BSU12390	uxaA
BSU23140	.				BSU14040	ldt
BSU23150	BSU23150	resA	cre2: +1709		BSU14120	abbA
BSU24120	.				BSU14130	ykuL	2.58649	2.55955		3.03373
BSU24130	.				BSU14140	ccpC	1.86442	1.41432		1.43365
BSU24140	.				BSU14890	ctaC	2.25041	1.33932		1.45815
BSU24150	.				BSU15100	ylbP		2.75987		1.88739
BSU24160	.				BSU16100	sucD	2.88935	2.75622	-1.74545	2.02545
BSU24170	.				BSU17580	xynB
BSU25190	BSU25190	cccA	-29		BSU17610	xylB	1.54314
BSU25840	.				BSU18960	yozM
BSU25890	.				BSU19030	yobO
BSU27030	.				BSU19360	odhB	4.25464	2.62196		4.50501
BSU27040	.				BSU19370	odhA
BSU27050	.				BSU19410	cwlS
BSU27060	.				BSU20850	yopL
BSU27070	BSU27070	levD	-45		BSU22090	kdgT				1.84622
BSU28540	.				BSU22100	kdgA
BSU28560	BSU28560	lcfA	450		BSU22110	kdgK				1.77974
BSU28710	BSU28710	cstA	32		BSU22130	kduI
BSU28720	.				BSU22140	kduD
BSU28730	.				BSU22560	qcrA				2.09873
BSU28740	.				BSU22570	ypiF	1.51782
BSU28750	.				BSU23110	resE	1.69361			2.82125
BSU28760	.				BSU23120	resD	1.69233	1.39839		2.56966
BSU28770	.				BSU23130	resC				2.16401
BSU28780	.				BSU23140	resB				2.21955
BSU28790	.				BSU24120	yqiQ
BSU28800	.				BSU24130	mmgE
BSU29100	.				BSU24140	mmgD
BSU29110	.				BSU24150	mmgC
BSU29120	.				BSU24160	mmgB
BSU29130	.				BSU24170	mmgA
BSU18000	.				BSU25840	phrE
BSU29140	BSU29140	citZ	88		BSU25890	yqxI
BSU29630	.				BSU27030	sacC
BSU29680	BSU29680	acsA	44		BSU27040	levG
BSU29690	BSU29690	acuA	-26		BSU27050	levF
BSU29700	.				BSU27060	levE
BSU29710	.				BSU28540	fadB
BSU33960	.				BSU28720	abfA	1.95272			1.65054
BSU34200	BSU34200	sigL	ND		BSU28730	araQ
BSU34780	.				BSU28740	araP
BSU35010	.				BSU28750	araN	3.69226			2.01649
BSU35050	.				BSU28760	araM
BSU35080	.				BSU28770	araL
BSU35910	BSU35910	rbsR	6		BSU28780	araD
BSU35920	.				BSU28790	araB
BSU35930	.				BSU28800	araA				1.37276
BSU35940	.				BSU29100	phoR	2.56283
BSU35950	.				BSU29110	phoP	3.22439			2.33721
BSU35960	.				BSU29120	mdh	1.85477	2.22686	-1.53838	1.96625
BSU37460	.				BSU29130	icd		1.87443
BSU37790	BSU37790	rocG	43		BSU18000	citB	2.05344	2.42945		2.22648
BSU38030	.				BSU29630	refZ				-1.68268
BSU38040	.				BSU29700	acuB	2.03292	1.70795		2.56661
BSU38050	BSU38050	sacP	-19		BSU29710	acuC	3.39571	2.04926		2.32828
BSU38190	.				BSU33960	araE
BSU38200	.				BSU34780	yvcI		1.5437
BSU38560	.				BSU35010	nagA
BSU38570	.				BSU35050	yvnA
BSU38580	.				BSU35080	yvmB
BSU38590	.				BSU35920	rbsK	8.51824			5.13667
BSU38730	.				BSU35930	rbsD	41.2276			9.77515
BSU38740	.				BSU35940	rbsA	40.2489			9.84233
BSU38750	.				BSU35950	rbsC	24.6987			4.72536
BSU38760	BSU38760	cydA	-21		BSU35960	rbsB	48.2043			15.2486
BSU38770	.				BSU37460	rapF
BSU38810	BSU38810	msmX	-15		BSU38030	ywdA	11.0664	1.5135		5.69435
BSU38820	.				BSU38040	sacA	14.6984			18.0989
BSU38970	.				BSU38190	galT	2.95827	2.38214		2.1387
BSU38980	.				BSU38200	galK				1.53147
BSU38990	.				BSU38560	licH	1.70918
BSU39000	.				BSU38570	licA	1.95644
BSU39070	.				BSU38580	licC	1.63459
BSU39250	.				BSU38590	licB
BSU39260	.				BSU38730	cydD
BSU39270	BSU39270	bglP	-36		BSU38740	cydC		2.21518		1.6002
BSU39330	.				BSU38750	cydB		2.09682
BSU39340	BSU39340	hutP	209		BSU38770	cimH
BSU39350	.				BSU38820	yxkF
BSU39360	.				BSU38970	yxjF
BSU39370	.				BSU38980	scoB
BSU39380	.				BSU38990	scoA
BSU39390	.				BSU39000	yxjC
BSU39400	.				BSU39070	bglS
BSU39410	.				BSU39250	yxiE	2.53355	1.93285
BSU39420	.				BSU39260	bglH	2.543			1.43601
BSU39670	.				BSU39330	abn2
BSU39680	.				BSU39350	hutH
BSU39690	.				BSU39360	hutU
BSU39700	.				BSU39370	hutI
BSU39710	.				BSU39380	hutG
BSU39720	.				BSU39390	hutM
BSU39730	.				BSU39400	pdp	1.79343	1.56822		1.92671
BSU39740	.				BSU39410	nupC		1.69735		2.12685
BSU39750	.				BSU39420	dra
BSU39760	BSU39760	iolA	cre2: +2404		BSU39670	iolJ
BSU40050	BSU40050	gntR	cre2: +148		BSU39680	iolI
BSU40060	.				BSU39690	iolH
BSU40070	.				BSU39700	iolG
BSU40080	.				BSU39710	iolF
BSU40310	.				BSU39720	iolE
BSU10270	.				BSU39730	iolD
BSU28520	.				BSU39740	iolC	2.32485			2.19076
BSU28530	.				BSU39750	iolB
BSU28540	.				BSU40060	gntK	3.78611	2.09611		3.09034
BSU28550	.				BSU40070	gntP	1.73874	1.45906		1.92733
BSU32820	.				BSU40080	gntZ
BSU32830	.				BSU40310	phrG	1.55376
BSU32840	.				BSU10270	lcfB
BSU23490	.				BSU28520	etfA	1.80536			2.17102
BSU23500	BSU23500	drm	-16		BSU28530	etfB				2.34743
BSU27760	BSU27760	csbX	-401		BSU28540	fadB
BSU12000	BSU12000	manR	0		BSU28550	fadR
BSU23550	.				BSU32820	fadE
BSU23560	BSU23560	mleN	21		BSU32830	fadA
BSU30260	BSU30260	msmR	-28		BSU32840	fadN
BSU30270	.				BSU23490	pupG
BSU30280	.				BSU23550	mleA	2.7516	1.76576		2.18853
BSU30290	.				BSU30270	msmE				-1.6379
BSU30300	.				BSU30280	amyD
BSU04160	BSU04160	mtlR	-16		BSU30290	amyC
BSU28510	BSU28510	xsa	7		BSU30300	melA
BSU10770	BSU10770	wprA	43

## Sheet: 8_cre_palindromicity
Genes with known cre sites with fold change >1.7 are grouped into three classes; only affected in the DELTAccpA strain, affected in both DELTAccpA and mutant ccpA strain, and only affected in the mutant ccpA strain.
The cre's with bold gene names are from Marciniak et al. BMC genomics 2012, the others are predicted by GenoList (GenoList website -> sequence analysis tools -> search pattern -> WTGNAANCGNWNNCW -> 0 mismatches).
Grey cells represent palindromic nucleotides.												Yellow cells: genes with high affinity cre site according to Marciniak et al.															See weblogo on the right side of this sheet
Table 1. LB+1% glucose (20140327). DELTACcpA and CcpA-M17R.																add weblogo's on this sheet!							Table 2. LB+1% glucose (20140327). DELTACcpA and CcpA-T62H.																							Table 3. LB+1% glucose (20140327). DELTACcpA and CcpA-R304W.
Locus tag	Gene	Fold change		cre sequence														palindromicity					Locus tag	Gene	Fold change		cre sequence														palindromicity					Locus tag	Gene	Fold change
		DELTACcpA	M17R	1	2	3	4	5	6	7	8	9	10	11	12	13	14	15	16			weblogo			DELTACcpA	T62H	1	2	3	4	5	6	7	8	9	10	11	12	13	14	15	16			weblogo			DELTACcpA	R304W
BSU35910	rbsR	50.8		A	T	G	T	A	A	A	C	G	G	T	T	A	C	A	T	7			BSU35910	rbsR	50.8		A	T	G	T	A	A	A	C	G	G	T	T	A	C	A	T	7			BSU00490	spoVG	3.5
BSU35940	rbsA	40.2		A	T	G	A	A	A	G	C	G	C	T	A	G	C	A	A	5			BSU35940	rbsA	40.2		A	T	G	A	A	A	G	C	G	C	T	A	G	C	A	A	5			BSU28710	cstA	2.4
BSU35920	rbsK	8.5		A	T	G	G	A	A	C	C	G	G	T	T	A	C	A	C	6			BSU37790	rocG	10.6		T	T	T	A	A	A	G	C	G	C	T	T	A	C	A	T	5			BSU39270	bglP	2.3
BSU38050	sacP	4.1		A	C	G	A	A	A	A	C	G	C	T	A	T	C	A	T	5			BSU35920	rbsK	8.5		A	T	G	G	A	A	C	C	G	G	T	T	A	C	A	C	6			BSU04160	mtlR	2.3
BSU09280	glpF	3.8		T	T	G	A	C	A	C	C	G	C	T	T	T	C	A	T	5			BSU25190	cccA	5.2		T	T	G	T	A	A	G	C	G	T	A	T	A	C	A	A	6			BSU28810	abnA	2.1
BSU08100	acoR	3.5		T	T	G	A	A	A	G	C	G	C	T	T	T	A	T	T	5			BSU27770	yrbE	4.5		T	T	G	A	A	A	A	C	G	G	T	G	C	C	A	T	4			BSU39340	hutP	2.1
BSU00490	spoVG	3.5		A	T	G	C	A	A	T	C	G	C	T	C	T	C	A	T	5			BSU38050	sacP	4.1		A	C	G	A	A	A	A	C	G	C	T	A	T	C	A	T	5			BSU10770	wprA	2
BSU29110	phoP	3.2		A	T	G	A	A	A	G	C	G	C	T	A	T	C	A	T	7			BSU09280	glpF	3.8		T	T	G	A	C	A	C	C	G	C	T	T	T	C	A	T	5			BSU03490	srfAB	1.9
BSU38810	msmX	2.7		A	A	G	A	A	A	G	C	G	T	T	T	A	C	A	A	4			BSU40060	gntK	3.8		T	T	G	G	A	A	G	C	G	A	T	T	T	C	T	T	4			BSU29470	ackA	-4.3
BSU28710	cstA	2.4		A	T	G	A	A	T	G	C	G	G	T	T	A	C	A	A	4			BSU16090	sucC	3.7		A	T	G	A	A	A	G	C	G	C	A	G	T	C	T	A	4			BSU35910	rbsR	50.8	13.9
BSU17600	xylA	2.3		T	T	G	G	A	A	G	C	G	C	A	A	A	C	A	A	5		1	BSU08100	acoR	3.5		T	T	G	A	A	A	G	C	G	C	T	T	T	A	T	T	5			BSU35940	rbsA	40.2	9.8
BSU39270	bglP	2.3		A	T	G	A	A	A	G	C	G	T	T	G	A	C	A	T	5			BSU00490	spoVG	3.5		A	T	G	C	A	A	T	C	G	C	T	C	T	C	A	T	5			BSU37790	rocG	10.6	8.8
BSU04160	mtlR	2.3		T	T	G	A	A	A	G	C	G	T	T	T	T	A	T	A	5			BSU29140	citZ	3.5		A	T	G	T	A	A	G	C	A	T	T	T	T	C	T	T	4			BSU35920	rbsK	8.5	5.1
BSU27760	csbX	2.2		T	T	G	A	A	A	A	C	G	G	T	G	C	C	A	T	4			BSU29110	phoP	3.2		A	T	G	A	A	A	G	C	G	C	T	A	T	C	A	T	7			BSU25190	cccA	5.2	2
BSU29680	acsA	2.1		T	T	G	A	A	A	G	C	G	T	T	A	C	C	A	G	4			BSU38190	galT	3		A	T	G	G	A	A	G	C	G	G	A	T	A	C	A	G	4			BSU27770	yrbE	4.5	3.1
BSU28810	abnA	2.1		T	T	G	T	A	A	G	C	G	C	T	T	T	C	T	A	6			BSU18010	yneN	2.7		T	T	G	A	A	A	A	C	G	C	T	A	T	C	A	G	5		5	BSU38050	sacP	4.1	4.9
BSU39340	hutP	2.1		T	T	G	A	A	A	C	C	G	C	T	T	C	C	A	A	6			BSU38810	msmX	2.7		A	A	G	A	A	A	G	C	G	T	T	T	A	C	A	A	4			BSU09280	glpF	3.8	4
BSU10770	wprA	2		C	T	G	T	A	A	G	C	G	G	T	A	T	C	T	C	3			BSU28710	cstA	2.4		A	T	G	A	A	T	G	C	G	G	T	T	A	C	A	A	4			BSU40060	gntK	3.8	3.1
BSU03490	srfAB	1.9		T	T	G	T	A	A	G	C	G	G	A	A	G	C	T	T	2			BSU23560	mleN	2.3		T	T	G	A	A	A	G	C	G	T	T	T	T	A	G	C	4			BSU16090	sucC	3.7	5.3
BSU14600	pdhC	1.9		T	T	G	C	A	A	C	C	G	T	T	C	C	C	T	C	3			BSU17600	xylA	2.3		T	T	G	G	A	A	G	C	G	C	A	A	A	C	A	A	5			BSU08100	acoR	3.5	2.3
BSU28560	lcfA	1.9		A	T	G	A	A	A	A	C	G	T	T	A	T	C	A	A	6			BSU39270	bglP	2.3		A	T	G	A	A	A	G	C	G	T	T	G	A	C	A	T	5			BSU29140	citZ	3.5	5.4
BSU29470	ackA	-4.3		T	T	G	T	A	A	G	C	G	T	T	A	T	C	A	A	5	4.86364		BSU04160	mtlR	2.3		T	T	G	A	A	A	G	C	G	T	T	T	T	A	T	A	5			BSU29110	phoP	3.2	2.3
BSU37790	rocG	10.6	3.9	T	T	T	A	A	A	G	C	G	C	T	T	A	C	A	T	5			BSU27760	csbX	2.2		T	T	G	A	A	A	A	C	G	G	T	G	C	C	A	T	4			BSU38190	galT	3	2.1
BSU25190	cccA	5.2	2.1	T	T	G	T	A	A	G	C	G	T	A	T	A	C	A	A	6			BSU29680	acsA	2.1		T	T	G	A	A	A	G	C	G	T	T	A	C	C	A	G	4			BSU18010	yneN	2.7	2.2
BSU27770	yrbE	4.5	6.3	T	T	G	A	A	A	A	C	G	G	T	G	C	C	A	T	4			BSU28810	abnA	2.1		T	T	G	T	A	A	G	C	G	C	T	T	T	C	T	A	6			BSU38810	msmX	2.7	2.7
BSU40060	gntK	3.8	2.1	T	T	G	G	A	A	G	C	G	A	T	T	T	C	T	T	4			BSU39340	hutP	2.1		T	T	G	A	A	A	C	C	G	C	T	T	C	C	A	A	6			BSU02110	ybyB	2.5	2.2
BSU16090	sucC	3.7	3.7	A	T	G	A	A	A	G	C	G	C	A	G	T	C	T	A	4			BSU10770	wprA	2		C	T	G	T	A	A	G	C	G	G	T	A	T	C	T	C	3			BSU23560	mleN	2.3	3.3
BSU29140	citZ	3.5	4.4	A	T	G	T	A	A	G	C	A	T	T	T	T	C	T	T	4			BSU03490	srfAB	1.9		T	T	G	T	A	A	G	C	G	G	A	A	G	C	T	T	2			BSU17600	xylA	2.3	2.2
BSU38190	galT	3	2.4	A	T	G	G	A	A	G	C	G	G	A	T	A	C	A	G	4		2	BSU14600	pdhC	1.9		T	T	G	C	A	A	C	C	G	T	T	C	C	C	T	C	3			BSU27760	csbX	2.2	2.3
BSU18010	yneN	2.7	2.2	T	T	G	A	A	A	A	C	G	C	T	A	T	C	A	G	5			BSU28560	lcfA	1.9		A	T	G	A	A	A	A	C	G	T	T	A	T	C	A	A	6			BSU29680	acsA	2.1	2
BSU02110	ybyB	2.5	3.5	A	T	G	G	A	A	A	C	G	T	T	C	C	C	A	G	6			BSU29470	ackA	-4.3		T	T	G	T	A	A	G	C	G	T	T	A	T	C	A	A	5	4.74194		BSU14600	pdhC	1.9	1.7
BSU23560	mleN	2.3	1.9	T	T	G	A	A	A	G	C	G	T	T	T	T	A	G	C	4	4.6		BSU02110	ybyB	2.5	-1.8	A	T	G	G	A	A	A	C	G	T	T	C	C	C	A	G	6	6		BSU28560	lcfA	1.9	2.3
BSU07800	treP		2.8	G	T	G	A	A	A	A	C	G	C	T	T	G	C	A	G	5			BSU12000	manR		7.9	A	T	G	T	A	A	A	C	G	G	T	T	T	C	T	T	5			BSU04470	dctP		3.5
BSU38760	cydA		1.8	A	T	G	A	A	A	T	G	A	A	T	C	G	T	T	G	2			BSU12010	manP		5.8	A	T	G	C	A	A	C	C	G	C	T	A	T	C	A	A	4		6	BSU23140	resB		2.2
BSU09300	glpD		-1.8	T	T	G	G	A	A	T	C	G	C	T	C	G	C	T	C	3	3.33333		BSU12940	dppC		-2.2	T	T	G	C	A	A	A	C	G	G	A	G	C	C	T	G	2	3.66667		BSU23150	resA		2.2
Schumacher et al. NAR 2011 consensus cre																																														BSU29690	acuA		2
				W	T	G	N	N	A	R	C	G	N	W	W	W	C	A	W																											BSU21470	sunT		2
																																														BSU23500	drm		2
																																														BSU03040	amyE		2
Table 4. LB without glucose (20140605). DELTACcpA and CcpA-M17R.																							Table 5. LB without glucose (20140605). DELTACcpA and CcpA-T62H.																							Table 6. LB without glucose (20140605). DELTACcpA and CcpA-R304W.
Locus tag	Gene	Fold change		cre sequence														palindromicity					Locus tag	Gene	Fold change		cre sequence														palindromicity					Locus tag	Gene	Fold change
		DELTACcpA	M17R	1	2	3	4	5	6	7	8	9	10	11	12	13	14	15	16						DELTACcpA	T62H	1	2	3	4	5	6	7	8	9	10	11	12	13	14	15	16						DELTACcpA	R304W
BSU03490	srfAB	3.3		T	T	G	T	A	A	G	C	G	G	A	A	G	C	T	T	2			BSU37790	rocG	4.6		T	T	T	A	A	A	G	C	G	C	T	T	A	C	A	T	5			BSU03490	srfAB	3.3
BSU23150	resA	3		G	T	A	A	A	A	A	C	G	C	T	T	T	C	T	A	4			BSU03490	srfAB	3.3		T	T	G	T	A	A	G	C	G	G	A	A	G	C	T	T	2			BSU23150	resA	3
BSU38760	cydA	2.9		A	T	G	A	A	A	T	G	A	A	T	C	G	T	T	G	2			BSU23150	resA	3		G	T	A	A	A	A	A	C	G	C	T	T	T	C	T	A	4			BSU38760	cydA	2.9
BSU18010	yneN	2.7		T	T	G	A	A	A	A	C	G	C	T	A	T	C	A	G	5			BSU38760	cydA	2.9		A	T	G	A	A	A	T	G	A	A	T	C	G	T	T	G	2			BSU04470	dctP	2.2
BSU29110	phoP	2.6		A	T	G	A	A	A	G	C	G	C	T	A	T	C	A	T	7			BSU18010	yneN	2.7		T	T	G	A	A	A	A	C	G	C	T	A	T	C	A	G	5			BSU39340	hutP	2.2
BSU04470	dctP	2.2		A	T	G	A	A	A	A	C	G	C	T	A	T	C	A	T	6			BSU29110	phoP	2.6		A	T	G	A	A	A	G	C	G	C	T	A	T	C	A	T	7			BSU35920	rbsK	2.1
BSU39340	hutP	2.2		T	T	G	G	A	A	G	C	G	G	T	T	T	C	A	A	6			BSU39340	hutP	2.2		T	T	G	A	A	A	C	C	G	C	T	T	C	C	A	A	6			BSU00490	spoVG	2
BSU25190	cccA	2.1		T	T	G	T	A	A	G	C	G	T	A	T	A	C	A	A	6			BSU00490	spoVG	2		A	T	G	C	A	A	T	C	G	C	T	C	T	C	A	T	5			BSU30260	msmR	-1.9
BSU00490	spoVG	2		A	T	G	C	A	A	T	C	G	C	T	C	T	C	A	T	5			BSU29470	ackA	-2.6		T	T	G	T	A	A	G	C	G	T	T	A	T	C	A	A	5			BSU07800	treP	-2.5
BSU07800	treP	-2.5		G	T	G	A	A	A	A	C	G	C	T	T	G	C	A	G	5			BSU12000	manR	-5.5		A	T	G	T	A	A	A	C	G	G	T	T	T	C	T	T	5			BSU29470	ackA	-2.6
BSU29470	ackA	-2.6		T	T	G	T	A	A	G	C	G	T	T	A	T	C	A	A	5			BSU12010	manP	-10.2		A	T	G	C	A	A	C	C	G	C	T	A	T	C	A	A	4	4.54545		BSU39270	bglP	-2.7
BSU39270	bglP	-2.7		A	T	G	A	A	A	G	C	G	T	T	G	A	C	A	T	5			BSU35940	rbsA	2.8	-6.9	A	T	G	A	A	A	G	C	G	C	T	A	G	C	A	A	5			BSU40060	gntK	-3
BSU40060	gntK	-3		T	T	G	G	A	A	G	C	G	A	T	T	T	C	T	T	4	4.76923		BSU35910	rbsR	2.3	-9.2	A	T	G	T	A	A	A	C	G	G	T	T	A	C	A	T	7			BSU09300	glpD	-5
BSU37790	rocG	4.6	9.1	T	T	T	A	A	A	G	C	G	C	T	T	A	C	A	T	5			BSU04470	dctP	2.2	-2.8	A	T	G	A	A	A	A	C	G	C	T	A	T	C	A	T	6			BSU37790	rocG	4.6	8.1
BSU35940	rbsA	2.8	-3.8	A	T	G	A	A	A	G	C	G	C	T	A	G	C	A	A	5			BSU25190	cccA	2.1	-2	T	T	G	T	A	A	G	C	G	T	A	T	A	C	A	A	6			BSU35940	rbsA	2.8	3.9
BSU35910	rbsR	2.3	-3.2	A	T	G	T	A	A	A	C	G	G	T	T	A	C	A	T	7			BSU35920	rbsK	2.1	-2.8	A	T	G	G	A	A	C	C	G	G	T	T	A	C	A	C	6		8	BSU18010	yneN	2.7	3.1
BSU35920	rbsK	2.1	-1.9	A	T	G	G	A	A	C	C	G	G	T	T	A	C	A	C	6		3	BSU30260	msmR	-1.9	-3.8	T	T	G	T	A	A	C	C	G	C	T	T	A	C	T	T	5			BSU29110	phoP	2.6	2.3
BSU30260	msmR	-1.9	-1.9	T	T	G	T	A	A	C	C	G	C	T	T	A	C	T	T	5			BSU07800	treP	-2.5	-6.3	G	T	G	A	A	A	A	C	G	C	T	T	G	C	A	G	5			BSU35910	rbsR	2.3	2.8
BSU09300	glpD	-5	-2.5	T	T	G	G	A	A	T	C	G	C	T	C	G	C	T	C	3			BSU39270	bglP	-2.7	-4.4	A	T	G	A	A	A	G	C	G	T	T	G	A	C	A	T	5			BSU25190	cccA	2.1	3.2
BSU12000	manR	-5.5	-7.6	A	T	G	T	A	A	A	C	G	G	T	T	T	C	T	T	5			BSU40060	gntK	-3	-3.3	T	T	G	G	A	A	G	C	G	A	T	T	T	C	T	T	4			BSU12000	manR	-5.5	-4.5
BSU12010	manP	-10.2	-7.1	A	T	G	C	A	A	C	C	G	C	T	A	T	C	A	A	4	5		BSU09300	glpD	-5	-6.9	T	T	G	G	A	A	T	C	G	C	T	C	G	C	T	C	3	5.2		BSU12010	manP	-10.2	-13.8
BSU29140	citZ		4.8	A	T	G	T	A	A	G	C	A	T	T	T	T	C	T	T	4			BSU16090	sucC		-1.9	A	T	G	A	A	A	G	C	G	C	A	G	T	C	T	A	4			BSU08100	acoR		3.7
BSU10900	yisY		3.5	T	T	G	C	A	A	A	C	G	G	A	A	C	C	A	A	4			BSU29690	acuA		-1.9	T	T	G	A	A	A	A	C	G	C	T	T	T	A	T	A	5			BSU22100	kdgA		3.2
BSU16090	sucC		2.3	A	T	G	A	A	A	G	C	G	C	A	G	T	C	T	A	4		4	BSU08100	acoR		-2	T	T	G	A	A	A	G	C	G	C	T	T	T	A	T	T	5			BSU27760	csbX		3.2
BSU14600	pdhC		1.8	T	T	G	C	A	A	C	C	G	T	T	C	C	C	T	C	3			BSU23560	mleN		-2.1	T	T	G	A	A	A	G	C	G	T	T	T	T	A	G	C	4			BSU29680	acsA		2.9
BSU09270	glpP		-1.9	A	T	G	A	A	A	G	C	G	G	T	G	T	C	A	A	5	4		BSU38050	sacP		-2.2	A	C	G	A	A	A	A	C	G	C	T	A	T	C	A	T	5			BSU27770	yrbE		2.7
																							BSU29140	citZ		-2.3	A	T	G	T	A	A	G	C	A	T	T	T	T	C	T	T	4			BSU39000	yxjC		2.6
																							BSU21470	sunT		-2.5	T	T	G	G	A	A	C	C	G	T	T	T	T	C	A	G	5		7	BSU38050	sacP		2.4
																							BSU38190	galT		-2.6	A	T	G	G	A	A	G	C	G	G	A	T	A	C	A	G	4			BSU28560	lcfA		2.1
																							BSU27770	yrbE		-3	T	T	G	A	A	A	A	C	G	G	T	G	C	C	A	T	4			BSU29690	acuA		2.1
																							BSU02110	ybyB		-3	A	T	G	G	A	A	A	C	G	T	T	C	C	C	A	G	6			BSU03040	amyE		2
																							BSU09280	glpF		-3.2	T	T	G	A	C	A	C	C	G	C	T	T	T	C	A	T	5			BSU07610	citM		1.9
																							BSU08060	acoA		-3.2	A	T	G	T	A	A	G	C	G	T	T	T	G	C	T	T	5			BSU38810	msmX		1.9
																							BSU38810	msmX		-4	A	A	G	A	A	A	G	C	G	T	T	T	A	C	A	A	4			BSU04160	mtlR		1.9
																							BSU10900	yisY		-20.4	T	T	G	C	A	A	A	C	G	G	A	A	C	C	A	A	4	4.57143		BSU28710	cstA		1.8
																																														BSU21090	yonH		1.8
																																														BSU28790	araB		1.7
																																														BSU06660	opuE		-1.8
																																														BSU36010	alsS		-1.8
[truncated: 18 more columns]

## Sheet: 9_LBgluc_COGcat
The genes with significant changes in gene expression (see sheet1) are categorized into Clusters of Orthologous Groups (COGs) for functional analysis. The strains were grown on LB + 1% glucose
Take all significant genes (strains were grown in LB + 1% glucose) -> copy locus tags to this website: http://genome2d.molgenrug.nl/index.php/dna-microarrays/functional-analysis -> Bsu 168 -> COG categories (COGcat)->
COG category (Cluster of Orthologous Groups)				DELTAccpA _ UP	DELTAccpA _DOWN	M17R _UP	M17R _ DOWN	T62H_UP	T62H _ DOWN	R304W _UP	R304W _ DOWN
[C] Energy production and conversion				37	2	18	6	0	7	36	3	[C]
[D] Cell cycle control, cell division, chromosome partitioning				0	0	0	0	0	1	0	1	[D]
[E] Amino acid transport and metabolism				8	7	7	1	0	1	9	4	[E]
[F] Nucleotide transport and metabolism				3	1	2	2	1	1	4	2	[F]
[G] Carbohydrate transport and metabolism				27	1	4	0	2	5	24	5	[G]
[H] Coenzyme transport and metabolism				1	2	1	0	0	0	3	1	[H]
[I] Lipid transport and metabolism				3	1	1	0	0	1	3	1	[I]
[J] Translation, ribosomal structure and biogenesis				2	1	3	0	1	6	1	14	[J]
[K] Transcription				9	3	2	0	1	3	6	4	[K]
[L] Replication, recombination and repair				1	0	0	0	0	1	1	0	[L]
[M] Cell wall/membrane/envelope biogenesis				2	1	3	0	0	1	2	1	[M]
[O] Posttranslational modification, protein turnover, chaperones				4	0	1	0	0	2	4	4	[O]
[P] Inorganic ion transport and metabolism				7	0	5	0	0	4	4	4	[P]
[Q] Secondary metabolites biosynthesis, transport and catabolism				4	1	1	0	0	0	2	2	[Q]
[R] General function prediction only				8	0	13	0	0	2	10	3	[R]
[S] Function unknown				8	0	8	1	0	2	2	2	[S]
[T] Signal transduction mechanisms				6	0	11	1	0	1	9	0	[T]
[U] Intracellular trafficking, secretion, and vesicular transport				2	0	0	0	0	0	0	0	[U]
[V] Defense mechanisms				0	0	0	0	0	1	1	1	[V]
[X] No prediction				0	0	0	0	0	0	0	0	[X]
			SUM ->	132	20	80	11	5	39	121	52
DELTAccpA _ UP	COG category	gene	product	DELTAccpA_DOWN	COG category	gene	product	M17R_UP	COG category	gene	product	M17R_ DOWN	COG category	gene	product	T62H_UP	COG category	gene	product	T62H_ DOWN	COG category	gene	product	R304W_UP	COG category	gene	product	R304W_ DOWN	COG category	gene	product
BSU00490	[M] Cell wall/membrane/envelope biogenesis	spoVG	septation protein SpoVG	BSU03000	[E] Amino acid transport and metabolism	opuAC	glycine betaine-binding protein OpuAC	BSU00250	[R] General function prediction only	xpaC	5-bromo 4-chloroindolyl phosphate hydrolysis protein XpaC	BSU03380	[T] Signal transduction mechanisms	yckB	ABC transporter extracellular-binding protein YckB	BSU12000	[K] Transcription	manR	transcriptional regulator ManR	BSU01050	[J] Translation, ribosomal structure and biogenesis	rplL	50S ribosomal protein L7/L12	BSU01310	[J] Translation, ribosomal structure and biogenesis	rplF	50S ribosomal protein L6	BSU00370	[K] Transcription	abrB	transition state regulatory protein AbrB
BSU02130	[C] Energy production and conversion	glpQ	glycerophosphoryl diester phosphodiesterase	BSU08990	[K] Transcription	yhbI	MarR family transcriptional regulator	BSU00520	[J] Translation, ribosomal structure and biogenesis	ctc	general stress protein CTC	BSU09300	[C] Energy production and conversion	glpD	aerobic glycerol-3-phosphate dehydrogenase	BSU12010	[G] Carbohydrate transport and metabolism	manP	PTS system mannose-specific EIIBCA component	BSU01500	[J] Translation, ribosomal structure and biogenesis	rpsI	30S ribosomal protein S9	BSU02130	[C] Energy production and conversion	glpQ	glycerophosphoryl diester phosphodiesterase	BSU00630	[J] Translation, ribosomal structure and biogenesis	yabR	hypothetical protein
BSU02140	[G] Carbohydrate transport and metabolism	glpT	glycerol-3-phosphate transporter	BSU09660	[G] Carbohydrate transport and metabolism	yheN	polysaccharide deacetylase	BSU00840	[S] Function unknown	mcsA	hypothetical protein	BSU15540	[F] Nucleotide transport and metabolism	pyrD	dihydroorotate dehydrogenase B	BSU12020	[G] Carbohydrate transport and metabolism	manA	mannose-6-phosphate isomerase ManA	BSU02350	[G] Carbohydrate transport and metabolism	nagP	PTS system glucosamine-specific EIICBA component	BSU02140	[G] Carbohydrate transport and metabolism	glpT	glycerol-3-phosphate transporter	BSU00690	[O] Posttranslational modification, protein turnover, chaperones	ftsH	ATP-dependent zinc metalloprotease FtsH
BSU03480	[Q] Secondary metabolites biosynthesis, transport and catabolism	srfAA	surfactin synthase subunit 1	BSU13960	[I] Lipid transport and metabolism	ykwC	oxidoreductase	BSU00850	[E] Amino acid transport and metabolism	mcsB	ATP:guanido phosphotransferase YacI	BSU15560	[F] Nucleotide transport and metabolism	pyrE	orotate phosphoribosyltransferase	BSU12040	[J] Translation, ribosomal structure and biogenesis	yjdG	N-acetyltransferase YjdG	BSU03940	[S] Function unknown	ycnI	hypothetical protein	BSU02830	[R] General function prediction only	ycdF	glucose 1-dehydrogenase 2	BSU00830	[K] Transcription	ctsR	transcriptional regulator CtsR
BSU03490	[Q] Secondary metabolites biosynthesis, transport and catabolism	srfAB	surfactin synthase subunit 2	BSU15540	[F] Nucleotide transport and metabolism	pyrD	dihydroorotate dehydrogenase B	BSU02830	[R] General function prediction only	ycdF	glucose 1-dehydrogenase 2	BSU23370	[S] Function unknown	ypuA	hypothetical protein	BSU15500	[F] Nucleotide transport and metabolism	pyrC	dihydroorotase	BSU03960	[K] Transcription	ycnK	DeoR family transcriptional regulator	BSU03040	[G] Carbohydrate transport and metabolism	amyE	alpha-amylase	BSU01050	[J] Translation, ribosomal structure and biogenesis	rplL	50S ribosomal protein L7/L12
BSU03510	[Q] Secondary metabolites biosynthesis, transport and catabolism	srfAC	surfactin synthase subunit 3	BSU16620	[J] Translation, ribosomal structure and biogenesis	ylxQ	ribosomal protein YlxQ	BSU03050	[C] Energy production and conversion	ldh	L-lactate dehydrogenase	BSU23910	[E] Amino acid transport and metabolism	yqjE	hypothetical protein					BSU05060	[K] Transcription	lrpB	AsnC family transcriptional regulator	BSU03480	[Q] Secondary metabolites biosynthesis, transport and catabolism	srfAA	surfactin synthase subunit 1	BSU01440	[J] Translation, ribosomal structure and biogenesis	rplQ	50S ribosomal protein L17
BSU03981	[G] Carbohydrate transport and metabolism	mtlA	PTS system mannitol-specific EIICB component	BSU22690	[E] Amino acid transport and metabolism	aroH	chorismate mutase AroH	BSU04190	[I] Lipid transport and metabolism	ydaD	general stress protein 39	BSU29220	[C] Energy production and conversion	ytsJ	NAD-dependent malic enzyme 4					BSU05310	[G] Carbohydrate transport and metabolism	ydeR	MFS transporter	BSU03981	[G] Carbohydrate transport and metabolism	mtlA	PTS system mannitol-specific EIICB component	BSU01500	[J] Translation, ribosomal structure and biogenesis	rpsI	30S ribosomal protein S9
BSU03990	[G] Carbohydrate transport and metabolism	mtlD	mannitol-1-phosphate 5-dehydrogenase	BSU23070	[H] Coenzyme transport and metabolism	serA	D-3-phosphoglycerate dehydrogenase	BSU04220	[R] General function prediction only	ydaG	general stress protein 26	BSU36820	[C] Energy production and conversion	atpG	ATP synthase gamma chain					BSU06860	[K] Transcription	yezE	TetR family transcriptional regulator	BSU03990	[G] Carbohydrate transport and metabolism	mtlD	mannitol-1-phosphate 5-dehydrogenase	BSU01580	[P] Inorganic ion transport and metabolism	ybaR	sulfate transporter YbaR
BSU04000	[C] Energy production and conversion	ycsA	tartrate dehydrogenase/decarboxylase	BSU24320	[K] Transcription	nusB	N utilization substance protein B homolog	BSU04380	[S] Function unknown	ydaT	hypothetical protein	BSU36830	[C] Energy production and conversion	atpA	ATP synthase subunit alpha					BSU08480	[C] Energy production and conversion	yfhC	NAD(P)H nitroreductase YfhC	BSU04220	[R] General function prediction only	ydaG	general stress protein 26	BSU02340	[C] Energy production and conversion	gltP	proton glutamate symport protein
BSU04100	[K] Transcription	kipR	IclR family transcriptional regulator	BSU28260	[E] Amino acid transport and metabolism	leuC	3-isopropylmalate dehydratase large subunit	BSU04430	[P] Inorganic ion transport and metabolism	ydbD	manganese catalase	BSU36840	[C] Energy production and conversion	atpH	ATP synthase subunit delta					BSU08730	[P] Inorganic ion transport and metabolism	perR	peroxide operon regulator	BSU04470	[C] Energy production and conversion	dctP	C4-dicarboxylate transport protein	BSU02960	[G] Carbohydrate transport and metabolism	yceJ	MFS transporter
BSU04160	[K] Transcription	mtlR	transcriptional regulator MtlR	BSU28290	[E] Amino acid transport and metabolism	ilvC	ketol-acid reductoisomerase	BSU04710	[T] Signal transduction mechanisms	rsbV	anti-sigma-B factor antagonist	BSU36850	[C] Energy production and conversion	atpF	ATP synthase subunit b					BSU08760	[R] General function prediction only	spo0M	sporulation-control protein spo0M	BSU04710	[T] Signal transduction mechanisms	rsbV	anti-sigma-B factor antagonist	BSU03000	[E] Amino acid transport and metabolism	opuAC	glycine betaine-binding protein OpuAC
BSU04730	[K] Transcription	sigB	RNA polymerase sigma-B factor	BSU28300	[E] Amino acid transport and metabolism	ilvH	acetolactate synthase small subunit	BSU04720	[T] Signal transduction mechanisms	rsbW	serine-protein kinase RsbW									BSU09530	[C] Energy production and conversion	yhdN	general stress protein 69	BSU04720	[T] Signal transduction mechanisms	rsbW	serine-protein kinase RsbW	BSU04020	[Q] Secondary metabolites biosynthesis, transport and catabolism	yczH	hydrolase
BSU05950	[R] General function prediction only	ydiF	ABC transporter ATP-binding protein	BSU29220	[C] Energy production and conversion	ytsJ	NAD-dependent malic enzyme 4	BSU04740	[T] Signal transduction mechanisms	rsbX	phosphoserine phosphatase RsbX									BSU10820	[V] Defense mechanisms	yisQ	transporter	BSU04730	[K] Transcription	sigB	RNA polymerase sigma-B factor	BSU04360	[P] Inorganic ion transport and metabolism	mntH	divalent metal cation transporter MntH
BSU06020	[O] Posttranslational modification, protein turnover, chaperones	groES	10 kDa chaperonin	BSU29460	[H] Coenzyme transport and metabolism	moaB	molybdenum cofactor biosynthesis protein B	BSU06400	[S] Function unknown	yebE	hypothetical protein									BSU12100	[G] Carbohydrate transport and metabolism	yjeA	hypothetical protein	BSU04740	[T] Signal transduction mechanisms	rsbX	phosphoserine phosphatase RsbX	BSU05120	[K] Transcription	cspC	cold shock protein CspC
BSU06560	[F] Nucleotide transport and metabolism	yerA	adenine deaminase YerA	BSU29470	[C] Energy production and conversion	ackA	acetate kinase	BSU06560	[F] Nucleotide transport and metabolism	yerA	adenine deaminase YerA									BSU12350	[I] Lipid transport and metabolism	yjmF	oxidoreductase	BSU06560	[F] Nucleotide transport and metabolism	yerA	adenine deaminase YerA	BSU05310	[G] Carbohydrate transport and metabolism	ydeR	MFS transporter
BSU06960	[T] Signal transduction mechanisms	yesN	transcriptional regulator	BSU29740	[K] Transcription	ccpA	catabolite control protein A	BSU07590	[T] Signal transduction mechanisms	citT	transcriptional regulatory protein CitT									BSU12940	[P] Inorganic ion transport and metabolism	dppC	dipeptide transport system permease protein DppC	BSU07810	[G] Carbohydrate transport and metabolism	treA	trehalose-6-phosphate hydrolase	BSU05620	[E] Amino acid transport and metabolism	ydgF	transporter
BSU07560	[G] Carbohydrate transport and metabolism	pel	pectate lyase	BSU32250	[E] Amino acid transport and metabolism	thrC	threonine synthase	BSU07800	[G] Carbohydrate transport and metabolism	treP	PTS system trehalose-specific EIIBC component									BSU14010	[N] Cell motility	cheV	chemotaxis protein CheV	BSU07850	[R] General function prediction only	yfkM	general stress protein 18	BSU05690	[R] General function prediction only	ydhB	hypothetical protein
BSU07650	[S] Function unknown	yflK	hypothetical protein	BSU32260	[E] Amino acid transport and metabolism	hom	homoserine dehydrogenase	BSU07810	[G] Carbohydrate transport and metabolism	treA	trehalose-6-phosphate hydrolase									BSU14170	[C] Energy production and conversion	ykuP	flavodoxin-2	BSU08100	[K] Transcription	acoR	acetoin dehydrogenase operon transcriptional activator AcoR	BSU08730	[P] Inorganic ion transport and metabolism	perR	peroxide operon regulator
BSU07850	[R] General function prediction only	yfkM	general stress protein 18	BSU36000	[Q] Secondary metabolites biosynthesis, transport and catabolism	alsD	alpha-acetolactate decarboxylase	BSU07850	[R] General function prediction only	yfkM	general stress protein 18									BSU16000	[R] General function prediction only	ylqC	hypothetical protein	BSU09280	[G] Carbohydrate transport and metabolism	glpF	glycerol uptake facilitator protein	BSU09000	[V] Defense mechanisms	yhbJ	efflux system component YhbJ
BSU08100	[K] Transcription	acoR	acetoin dehydrogenase operon transcriptional activator AcoR	BSU39230	[M] Cell wall/membrane/envelope biogenesis	wapA	wall-associated protein	BSU07880	[T] Signal transduction mechanisms	yfkJ	low molecular weight protein-tyrosine-phosphatase YfkJ									BSU16100	[C] Energy production and conversion	sucD	succinyl-CoA ligase [ADP-forming] subunit alpha	BSU09290	[C] Energy production and conversion	glpK	glycerol kinase	BSU09020	[R] General function prediction only	yhcB	hypothetical protein
BSU09280	[G] Carbohydrate transport and metabolism	glpF	glycerol uptake facilitator protein					BSU09690	[T] Signal transduction mechanisms	nhaX	stress response protein NhaX									BSU19140	[S] Function unknown	yozB	membrane protein	BSU09690	[T] Signal transduction mechanisms	nhaX	stress response protein NhaX	BSU09100	[K] Transcription	cspB	cold shock protein CspB
BSU09290	[C] Energy production and conversion	glpK	glycerol kinase					BSU11430	[E] Amino acid transport and metabolism	oppA	oligopeptide ABC transporter binding lipoprotein									BSU19550	[C] Energy production and conversion	yodC	NAD(P)H nitroreductase	BSU13020	[E] Amino acid transport and metabolism	ykgA	hypothetical protein	BSU09660	[G] Carbohydrate transport and metabolism	yheN	polysaccharide deacetylase
BSU10390	[E] Amino acid transport and metabolism	yhfW	rieske 2Fe-2S iron-sulfur protein YhfW					BSU11850	[J] Translation, ribosomal structure and biogenesis	yjcG	hypothetical protein									BSU21440	[O] Posttranslational modification, protein turnover, chaperones	bdbB	disulfide bond formation protein B	BSU13340	[K] Transcription	ykoM	MarR family transcriptional regulator	BSU11340	[Q] Secondary metabolites biosynthesis, transport and catabolism	fabF	3-oxoacyl-[acyl-carrier-protein] synthase 2
BSU10770	[O] Posttranslational modification, protein turnover, chaperones	wprA	cell wall-associated protease					BSU13020	[E] Amino acid transport and metabolism	ykgA	hypothetical protein									BSU21920	[M] Cell wall/membrane/envelope biogenesis	ugtP	processive diacylglycerol glucosyltransferase	BSU14380	[K] Transcription	fruR	DeoR family transcriptional regulator	BSU12190	[F] Nucleotide transport and metabolism	yjhB	ADP-ribose pyrophosphatase YjhB
BSU10870	[R] General function prediction only	yisU	amino acid transporter YisU					BSU13340	[K] Transcription	ykoM	MarR family transcriptional regulator									BSU22180	[D] Cell cycle control, cell division, chromosome partitioning	ypsB	cell cycle protein GpsB	BSU14390	[G] Carbohydrate transport and metabolism	fruK	phosphofructokinase	BSU14010	[N] Cell motility	cheV	chemotaxis protein CheV
BSU13020	[E] Amino acid transport and metabolism	ykgA	hypothetical protein					BSU14150	[C] Energy production and conversion	ykuN	flavodoxin									BSU22790	[L] Replication, recombination and repair	hbs	DNA-binding protein HU 1	BSU14400	[G] Carbohydrate transport and metabolism	fruA	PTS system fructose-specific EIIABC component	BSU15080	[J] Translation, ribosomal structure and biogenesis	rpmF	50S ribosomal protein L32
BSU13340	[K] Transcription	ykoM	MarR family transcriptional regulator					BSU14870	[O] Posttranslational modification, protein turnover, chaperones	ctaA	heme A synthase									BSU22960	[E] Amino acid transport and metabolism	gudB	cryptic catabolic NAD-specific glutamate dehydrogenase GudB	BSU14590	[C] Energy production and conversion	pdhB	pyruvate dehydrogenase E1 component subunit beta	BSU15820	[J] Translation, ribosomal structure and biogenesis	rpmB	50S ribosomal protein L28
BSU13490	[O] Posttranslational modification, protein turnover, chaperones	ykrL	protease HtpX homolog					BSU16090	[C] Energy production and conversion	sucC	succinyl-CoA ligase [ADP-forming] subunit beta									BSU24970	[P] Inorganic ion transport and metabolism	pstA	ABC transporter permease	BSU14600	[C] Energy production and conversion	pdhC	dihydrolipoyllysine-residue acetyltransferase component of pyruvate dehydrogenase complex	BSU16520	[J] Translation, ribosomal structure and biogenesis	frr	ribosome-recycling factor
BSU13810	[S] Function unknown	ykvS	hypothetical protein					BSU16100	[C] Energy production and conversion	sucD	succinyl-CoA ligase [ADP-forming] subunit alpha									BSU27940	[J] Translation, ribosomal structure and biogenesis	rpmA	50S ribosomal protein L27	BSU16090	[C] Energy production and conversion	sucC	succinyl-CoA ligase [ADP-forming] subunit beta	BSU16680	[J] Translation, ribosomal structure and biogenesis	rpsO	30S ribosomal protein S15
BSU14140	[K] Transcription	ccpC	LysR family transcriptional regulator					BSU18000	[C] Energy production and conversion	citB	aconitate hydratase									BSU28850	[J] Translation, ribosomal structure and biogenesis	rplT	50S ribosomal protein L20	BSU16100	[C] Energy production and conversion	sucD	succinyl-CoA ligase [ADP-forming] subunit alpha	BSU19620	[M] Cell wall/membrane/envelope biogenesis	yodJ	carboxypeptidase YodJ
BSU14150	[C] Energy production and conversion	ykuN	flavodoxin					BSU18010	[C] Energy production and conversion	yneN	thioredoxin									BSU29660	[J] Translation, ribosomal structure and biogenesis	rpsD	30S ribosomal protein S4	BSU16990	[R] General function prediction only	tdh	L-threonine 3-dehydrogenase	BSU22180	[D] Cell cycle control, cell division, chromosome partitioning	ypsB	cell cycle protein GpsB
BSU14170	[C] Energy production and conversion	ykuP	flavodoxin-2					BSU18510	[R] General function prediction only	yoxC	hypothetical protein									BSU32110	[O] Posttranslational modification, protein turnover, chaperones	yumC	ferredoxin--NADP reductase 2	BSU17000	[H] Coenzyme transport and metabolism	kbl	2-amino-3-ketobutyrate CoA ligase	BSU22600	[E] Amino acid transport and metabolism	aroE	3-phosphoshikimate 1-carboxyvinyltransferase
BSU14380	[K] Transcription	fruR	DeoR family transcriptional regulator					BSU19360	[C] Energy production and conversion	odhB	dihydrolipoyllysine-residue succinyltransferase component of 2-oxoglutarate dehydrogenase complex									BSU32440	[F] Nucleotide transport and metabolism	pucK	uric acid permease PucK	BSU17600	[G] Carbohydrate transport and metabolism	xylA	xylose isomerase	BSU23370	[S] Function unknown	ypuA	hypothetical protein
BSU14390	[G] Carbohydrate transport and metabolism	fruK	phosphofructokinase					BSU20460	[R] General function prediction only	yoqZ	hypothetical protein									BSU33320	[P] Inorganic ion transport and metabolism	fhuD	iron(3+)-hydroxamate-binding protein FhuD	BSU18000	[C] Energy production and conversion	citB	aconitate hydratase	BSU23830	[I] Lipid transport and metabolism	yqjL	hypothetical protein
BSU14400	[G] Carbohydrate transport and metabolism	fruA	PTS system fructose-specific EIIABC component					BSU22550	[C] Energy production and conversion	qcrB	menaquinol-cytochrome c reductase cytochrome b subunit									BSU35400	[N] Cell motility	flgL	flagellar hook-associated protein 3	BSU18010	[C] Energy production and conversion	yneN	thioredoxin	BSU24450	[J] Translation, ribosomal structure and biogenesis	efp	elongation factor P
BSU14590	[C] Energy production and conversion	pdhB	pyruvate dehydrogenase E1 component subunit beta					BSU22730	[F] Nucleotide transport and metabolism	ndk	nucleoside diphosphate kinase									BSU37310	[T] Signal transduction mechanisms	fnr	anaerobic regulatory protein	BSU19310	[C] Energy production and conversion	dhaS	aldehyde dehydrogenase DhaS	BSU25400	[S] Function unknown	yqeY	hypothetical protein
BSU14600	[C] Energy production and conversion	pdhC	dihydrolipoyllysine-residue acetyltransferase component of pyruvate dehydrogenase complex					BSU23550	[C] Energy production and conversion	mleA	NAD-dependent malic enzyme 1									BSU37780	[C] Energy production and conversion	rocA	1-pyrroline-5-carboxylate dehydrogenase	BSU19360	[C] Energy production and conversion	odhB	dihydrolipoyllysine-residue succinyltransferase component of 2-oxoglutarate dehydrogenase complex	BSU25550	[J] Translation, ribosomal structure and biogenesis	rpsT	30S ribosomal protein S20
BSU14610	[C] Energy production and conversion	pdhD	dihydrolipoyl dehydrogenase					BSU23560	[C] Energy production and conversion	mleN	malate-2H(+)/Na(+)-lactate antiporter									BSU38640	[G] Carbohydrate transport and metabolism	yxlH	MFS transporter	BSU21450	[M] Cell wall/membrane/envelope biogenesis	yolJ	glycosyltransferase SunS	BSU27540	[H] Coenzyme transport and metabolism	yrvM	hypothetical protein
BSU14870	[O] Posttranslational modification, protein turnover, chaperones	ctaA	heme A synthase					BSU24000	[R] General function prediction only	bmrU	lipid kinase BmrU									BSU38720	[G] Carbohydrate transport and metabolism	yxkO	adp-dependent (S)-NAD(P)H-hydrate dehydratase	BSU21460	[O] Posttranslational modification, protein turnover, chaperones	bdbA	disulfide bond formation protein A	BSU27940	[J] Translation, ribosomal structure and biogenesis	rpmA	50S ribosomal protein L27
BSU14890	[C] Energy production and conversion	ctaC	cytochrome c oxidase subunit 2					BSU24860	[S] Function unknown	yqgQ	hypothetical protein									BSU40550	[C] Energy production and conversion	ppaC	manganese-dependent inorganic pyrophosphatase	BSU21470	[V] Defense mechanisms	sunT	sublancin-168-processing and transport ATP-binding protein SunT	BSU28250	[E] Amino acid transport and metabolism	leuD	3-isopropylmalate dehydratase small subunit
BSU14900	[C] Energy production and conversion	ctaD	cytochrome c oxidase subunit 1					BSU25190	[C] Energy production and conversion	cccA	cytochrome c-550									BSU40890	[J] Translation, ribosomal structure and biogenesis	rpsR	30S ribosomal protein S18	BSU22080	[E] Amino acid transport and metabolism	ypwA	metalloprotease YpwA	BSU28850	[J] Translation, ribosomal structure and biogenesis	rplT	50S ribosomal protein L20
BSU14910	[C] Energy production and conversion	ctaE	cytochrome c oxidase subunit 3					BSU27220	[R] General function prediction only	yrhE	formate dehydrogenase YrhE													BSU22110	[G] Carbohydrate transport and metabolism	kdgK	2-dehydro-3-deoxygluconokinase	BSU29660	[J] Translation, ribosomal structure and biogenesis	rpsD	30S ribosomal protein S4
BSU14920	[C] Energy production and conversion	ctaF	cytochrome c oxidase subunit 4B					BSU27770	[R] General function prediction only	yrbE	oxidoreductase													BSU22540	[C] Energy production and conversion	qcrC	menaquinol-cytochrome c reductase cytochrome b/c subunit	BSU31580	[C] Energy production and conversion	maeN	Na(+)-malate symporter
BSU16090	[C] Energy production and conversion	sucC	succinyl-CoA ligase [ADP-forming] subunit beta					BSU28170	[H] Coenzyme transport and metabolism	hemA	glutamyl-tRNA reductase													BSU22550	[C] Energy production and conversion	qcrB	menaquinol-cytochrome c reductase cytochrome b subunit	BSU32040	[R] General function prediction only	yuiF	amino acid transporter YuiF
BSU16100	[C] Energy production and conversion	sucD	succinyl-CoA ligase [ADP-forming] subunit alpha					BSU28910	[R] General function prediction only	ysbA	antiholin-like protein LrgA													BSU22560	[C] Energy production and conversion	qcrA	menaquinol-cytochrome c reductase iron-sulfur subunit	BSU32110	[O] Posttranslational modification, protein turnover, chaperones	yumC	ferredoxin--NADP reductase 2
BSU16990	[R] General function prediction only	tdh	L-threonine 3-dehydrogenase					BSU29120	[C] Energy production and conversion	mdh	malate dehydrogenase													BSU22730	[F] Nucleotide transport and metabolism	ndk	nucleoside diphosphate kinase	BSU32290	[G] Carbohydrate transport and metabolism	yutF	hydrolase YutF
BSU17000	[H] Coenzyme transport and metabolism	kbl	2-amino-3-ketobutyrate CoA ligase					BSU29130	[C] Energy production and conversion	icd	isocitrate dehydrogenase													BSU23110	[T] Signal transduction mechanisms	resE	sensor histidine kinase	BSU32440	[F] Nucleotide transport and metabolism	pucK	uric acid permease PucK
BSU17330	[J] Translation, ribosomal structure and biogenesis	miaA	tRNA dimethylallyltransferase					BSU29140	[C] Energy production and conversion	citZ	citrate synthase 2													BSU23120	[T] Signal transduction mechanisms	resD	transcriptional regulatory protein ResD	BSU33600	[O] Posttranslational modification, protein turnover, chaperones	smpB	SsrA-binding protein
BSU17600	[G] Carbohydrate transport and metabolism	xylA	xylose isomerase					BSU29700	[T] Signal transduction mechanisms	acuB	acetoin utilization protein AcuB													BSU23130	[O] Posttranslational modification, protein turnover, chaperones	resC	cytochrome c biogenesis protein ResC	BSU35400	[N] Cell motility	flgL	flagellar hook-associated protein 3
BSU17710	[U] Intracellular trafficking, secretion, and vesicular transport	tatAC	Sec-independent protein translocase protein TatAc					BSU29710	[Q] Secondary metabolites biosynthesis, transport and catabolism	acuC	acetoin utilization protein AcuC													BSU23140	[O] Posttranslational modification, protein turnover, chaperones	resB	cytochrome c biogenesis protein ResB	BSU36030	[P] Inorganic ion transport and metabolism	ywrK	arsenical pump membrane protein
BSU18000	[C] Energy production and conversion	citB	aconitate hydratase					BSU29770	[R] General function prediction only	ytxH	hypothetical protein													BSU23150	[O] Posttranslational modification, protein turnover, chaperones	resA	thiol-disulfide oxidoreductase ResA	BSU38640	[G] Carbohydrate transport and metabolism	yxlH	MFS transporter
BSU18010	[C] Energy production and conversion	yneN	thioredoxin					BSU29780	[R] General function prediction only	ytxG	hypothetical protein													BSU23500	[G] Carbohydrate transport and metabolism	drm	phosphopentomutase	BSU40100	[O] Posttranslational modification, protein turnover, chaperones	ahpF	NADH dehydrogenase
BSU18220	[I] Lipid transport and metabolism	yngF	enoyl-CoA hydratase/isomerase YngF					BSU30020	[K] Transcription	ytzE	DeoR family transcriptional regulator													BSU23550	[C] Energy production and conversion	mleA	NAD-dependent malic enzyme 1	BSU40550	[C] Energy production and conversion	ppaC	manganese-dependent inorganic pyrophosphatase
BSU19360	[C] Energy production and conversion	odhB	dihydrolipoyllysine-residue succinyltransferase component of 2-oxoglutarate dehydrogenase complex					BSU30650	[P] Inorganic ion transport and metabolism	dps	general stress protein 20U													BSU23560	[C] Energy production and conversion	mleN	malate-2H(+)/Na(+)-lactate antiporter	BSU40890	[J] Translation, ribosomal structure and biogenesis	rpsR	30S ribosomal protein S18
BSU20340	[L] Replication, recombination and repair	yorL	DNA polymerase YorL					BSU30930	[T] Signal transduction mechanisms	ytaB	membrane protein													BSU24000	[R] General function prediction only	bmrU	lipid kinase BmrU
BSU22540	[C] Energy production and conversion	qcrC	menaquinol-cytochrome c reductase cytochrome b/c subunit					BSU31000	[M] Cell wall/membrane/envelope biogenesis	yuaI	N-acetyltransferase YuaI													BSU24560	[E] Amino acid transport and metabolism	gcvPA	glycine dehydrogenase subunit 1
BSU22550	[C] Energy production and conversion	qcrB	menaquinol-cytochrome c reductase cytochrome b subunit					BSU31610	[P] Inorganic ion transport and metabolism	mrpB	Na(+)/H(+) antiporter subunit B													BSU24990	[P] Inorganic ion transport and metabolism	pstS	phosphate-binding protein PstS
BSU22580	[S] Function unknown	ypiB	hypothetical protein					BSU32060	[S] Function unknown	yuiD	membrane protein													BSU25190	[C] Energy production and conversion	cccA	cytochrome c-550
BSU22650	[E] Amino acid transport and metabolism	trpF	N-(5'-phosphoribosyl)anthranilate isomerase					BSU32990	[P] Inorganic ion transport and metabolism	mrgA	metalloregulation DNA-binding stress protein													BSU25280	[L] Replication, recombination and repair	recO	DNA repair protein RecO
BSU22730	[F] Nucleotide transport and metabolism	ndk	nucleoside diphosphate kinase					BSU33380	[P] Inorganic ion transport and metabolism	yvgL	ABC transporter substrate-binding protein													BSU26610	[R] General function prediction only	yrkA	hypothetical protein
BSU23550	[C] Energy production and conversion	mleA	NAD-dependent malic enzyme 1					BSU33530	[R] General function prediction only	yvaA	oxidoreductase													BSU26860	[C] Energy production and conversion	yraO	transporter
BSU23560	[C] Energy production and conversion	mleN	malate-2H(+)/Na(+)-lactate antiporter					BSU35180	[S] Function unknown	csbA	general stress protein CsbA													BSU27220	[R] General function prediction only	yrhE	formate dehydrogenase YrhE
BSU23890	[U] Intracellular trafficking, secretion, and vesicular transport	yqjG	membrane protein insertase MisCB					BSU35310	[J] Translation, ribosomal structure and biogenesis	yvyD	sigma-54 modulation protein													BSU27760	[P] Inorganic ion transport and metabolism	csbX	alpha-ketoglutarate permease
BSU24560	[E] Amino acid transport and metabolism	gcvPA	glycine dehydrogenase subunit 1					BSU35670	[M] Cell wall/membrane/envelope biogenesis	gtaB	UTP--glucose-1-phosphate uridylyltransferase													BSU27770	[R] General function prediction only	yrbE	oxidoreductase
BSU24860	[S] Function unknown	yqgQ	hypothetical protein					BSU35970	[T] Signal transduction mechanisms	ywsB	cell wall-binding protein YwsB													BSU28150	[H] Coenzyme transport and metabolism	hemC	porphobilinogen deaminase
BSU24950	[P] Inorganic ion transport and metabolism	pstBB	phosphate import ATP-binding protein PstB 1					BSU37310	[T] Signal transduction mechanisms	fnr	anaerobic regulatory protein													BSU28170	[H] Coenzyme transport and metabolism	hemA	glutamyl-tRNA reductase
BSU24960	[P] Inorganic ion transport and metabolism	pstBA	phosphate import ATP-binding protein PstB 2					BSU37770	[E] Amino acid transport and metabolism	rocB	arginine utilization protein RocB													BSU28430	[C] Energy production and conversion	sdhB	succinate dehydrogenase iron-sulfur subunit
BSU24970	[P] Inorganic ion transport and metabolism	pstA	ABC transporter permease					BSU37780	[C] Energy production and conversion	rocA	1-pyrroline-5-carboxylate dehydrogenase													BSU28440	[C] Energy production and conversion	sdhA	succinate dehydrogenase flavoprotein subunit
BSU24990	[P] Inorganic ion transport and metabolism	pstS	phosphate-binding protein PstS					BSU37790	[E] Amino acid transport and metabolism	rocG	catabolic NAD-specific glutamate dehydrogenase RocG													BSU28450	[C] Energy production and conversion	sdhC	succinate dehydrogenase cytochrome b558 subunit
BSU25190	[C] Energy production and conversion	cccA	cytochrome c-550					BSU37930	[S] Function unknown	ywdK	hypothetical protein													BSU28520	[C] Energy production and conversion	etfA	electron transfer flavoprotein subunit alpha
BSU27210	[S] Function unknown	yrhF	hypothetical protein					BSU38180	[S] Function unknown	ywzA	hypothetical protein													BSU28530	[C] Energy production and conversion	etfB	electron transfer flavoprotein subunit beta
BSU27760	[P] Inorganic ion transport and metabolism	csbX	alpha-ketoglutarate permease					BSU38190	[G] Carbohydrate transport and metabolism	galT	galactose-1-phosphate uridylyltransferase													BSU28560	[I] Lipid transport and metabolism	lcfA	long-chain-fatty-acid--CoA ligase
BSU27770	[R] General function prediction only	yrbE	oxidoreductase					BSU38430	[M] Cell wall/membrane/envelope biogenesis	gspA	general stress protein A													BSU28750	[G] Carbohydrate transport and metabolism	araN	arabinose-binding protein
BSU28430	[C] Energy production and conversion	sdhB	succinate dehydrogenase iron-sulfur subunit					BSU38740	[C] Energy production and conversion	cydC	ATP-binding/permease protein CydC													BSU28910	[R] General function prediction only	ysbA	antiholin-like protein LrgA
BSU28440	[C] Energy production and conversion	sdhA	succinate dehydrogenase flavoprotein subunit					BSU38750	[C] Energy production and conversion	cydB	cytochrome d ubiquinol oxidase subunit 2													BSU29110	[K] Transcription	phoP	alkaline phosphatase synthesis transcriptional regulatory protein PhoP
BSU28450	[C] Energy production and conversion	sdhC	succinate dehydrogenase cytochrome b558 subunit					BSU38760	[C] Energy production and conversion	cydA	cytochrome d ubiquinol oxidase subunit 1													BSU29120	[C] Energy production and conversion	mdh	malate dehydrogenase
BSU28520	[C] Energy production and conversion	etfA	electron transfer flavoprotein subunit alpha					BSU39250	[T] Signal transduction mechanisms	yxiE	universal stress protein YxiE													BSU29140	[C] Energy production and conversion	citZ	citrate synthase 2
BSU28560	[I] Lipid transport and metabolism	lcfA	long-chain-fatty-acid--CoA ligase					BSU40060	[G] Carbohydrate transport and metabolism	gntK	gluconokinase													BSU29680	[I] Lipid transport and metabolism	acsA	acetyl-coenzyme A synthetase
BSU28710	[T] Signal transduction mechanisms	cstA	carbon starvation protein A homolog					BSU40330	[E] Amino acid transport and metabolism	rocE	amino acid permease RocE													BSU29700	[T] Signal transduction mechanisms	acuB	acetoin utilization protein AcuB
BSU28720	[G] Carbohydrate transport and metabolism	abfA	alpha-L-arabinofuranosidase					BSU40340	[E] Amino acid transport and metabolism	rocD	ornithine aminotransferase													BSU29710	[Q] Secondary metabolites biosynthesis, transport and catabolism	acuC	acetoin utilization protein AcuC
BSU28750	[G] Carbohydrate transport and metabolism	araN	arabinose-binding protein																					BSU29720	[N] Cell motility	ytxE	hypothetical protein
BSU28810	[G] Carbohydrate transport and metabolism	abnA	arabinan-endo 1,5-alpha-L-arabinase																					BSU29780	[R] General function prediction only	ytxG	hypothetical protein
BSU28910	[R] General function prediction only	ysbA	antiholin-like protein LrgA																					BSU30650	[P] Inorganic ion transport and metabolism	dps	general stress protein 20U
BSU29100	[T] Signal transduction mechanisms	phoR	alkaline phosphatase synthesis sensor protein PhoR																					BSU30930	[T] Signal transduction mechanisms	ytaB	membrane protein
BSU29110	[K] Transcription	phoP	alkaline phosphatase synthesis transcriptional regulatory protein PhoP																					BSU31930	[E] Amino acid transport and metabolism	ald	alanine dehydrogenase
BSU29120	[C] Energy production and conversion	mdh	malate dehydrogenase																					BSU35180	[S] Function unknown	csbA	general stress protein CsbA
BSU29140	[C] Energy production and conversion	citZ	citrate synthase 2																					BSU35910	[K] Transcription	rbsR	ribose operon repressor
BSU29500	[S] Function unknown	ytfJ	spore protein YtfJ																					BSU35920	[G] Carbohydrate transport and metabolism	rbsK	ribokinase
BSU29680	[I] Lipid transport and metabolism	acsA	acetyl-coenzyme A synthetase																					BSU35930	[G] Carbohydrate transport and metabolism	rbsD	D-ribose pyranase
BSU29700	[T] Signal transduction mechanisms	acuB	acetoin utilization protein AcuB																					BSU35940	[G] Carbohydrate transport and metabolism	rbsA	ribose import ATP-binding protein RbsA
BSU29710	[Q] Secondary metabolites biosynthesis, transport and catabolism	acuC	acetoin utilization protein AcuC																					BSU35950	[G] Carbohydrate transport and metabolism	rbsC	ribose transport system permease RbsC
BSU29770	[R] General function prediction only	ytxH	hypothetical protein																					BSU35960	[G] Carbohydrate transport and metabolism	rbsB	D-ribose-binding protein
BSU29780	[R] General function prediction only	ytxG	hypothetical protein																					BSU35970	[T] Signal transduction mechanisms	ywsB	cell wall-binding protein YwsB
BSU30560	[C] Energy production and conversion	pckA	phosphoenolpyruvate carboxykinase																					BSU36800	[C] Energy production and conversion	atpC	ATP synthase epsilon chain
BSU30650	[P] Inorganic ion transport and metabolism	dps	general stress protein 20U																					BSU36810	[C] Energy production and conversion	atpD	ATP synthase subunit beta
BSU31190	[S] Function unknown	yulD	L-rhamnose mutarotase																					BSU36820	[C] Energy production and conversion	atpG	ATP synthase gamma chain
BSU33380	[P] Inorganic ion transport and metabolism	yvgL	ABC transporter substrate-binding protein																					BSU36830	[C] Energy production and conversion	atpA	ATP synthase subunit alpha
BSU35180	[S] Function unknown	csbA	general stress protein CsbA																					BSU36840	[C] Energy production and conversion	atpH	ATP synthase subunit delta
BSU35310	[J] Translation, ribosomal structure and biogenesis	yvyD	sigma-54 modulation protein																					BSU36850	[C] Energy production and conversion	atpF	ATP synthase subunit b
BSU35910	[K] Transcription	rbsR	ribose operon repressor																					BSU36870	[C] Energy production and conversion	atpB	ATP synthase subunit a
BSU35920	[G] Carbohydrate transport and metabolism	rbsK	ribokinase																					BSU37240	[I] Lipid transport and metabolism	ywiE	cardiolipin synthase YwiE
BSU35930	[G] Carbohydrate transport and metabolism	rbsD	D-ribose pyranase																					BSU37280	[C] Energy production and conversion	narG	nitrate reductase alpha chain
BSU35940	[G] Carbohydrate transport and metabolism	rbsA	ribose import ATP-binding protein RbsA																					BSU37760	[E] Amino acid transport and metabolism	rocC	amino acid permease RocC
BSU35950	[G] Carbohydrate transport and metabolism	rbsC	ribose transport system permease RbsC																					BSU37770	[E] Amino acid transport and metabolism	rocB	arginine utilization protein RocB
BSU35960	[G] Carbohydrate transport and metabolism	rbsB	D-ribose-binding protein																					BSU37780	[C] Energy production and conversion	rocA	1-pyrroline-5-carboxylate dehydrogenase
BSU35970	[T] Signal transduction mechanisms	ywsB	cell wall-binding protein YwsB																					BSU37790	[E] Amino acid transport and metabolism	rocG	catabolic NAD-specific glutamate dehydrogenase RocG
BSU36800	[C] Energy production and conversion	atpC	ATP synthase epsilon chain																					BSU37930	[S] Function unknown	ywdK	hypothetical protein
BSU36810	[C] Energy production and conversion	atpD	ATP synthase subunit beta																					BSU38040	[G] Carbohydrate transport and metabolism	sacA	sucrose-6-phosphate hydrolase
BSU36820	[C] Energy production and conversion	atpG	ATP synthase gamma chain																					BSU38050	[G] Carbohydrate transport and metabolism	sacP	PTS system sucrose-specific EIIBC component
BSU36830	[C] Energy production and conversion	atpA	ATP synthase subunit alpha																					BSU38160	[C] Energy production and conversion	qoxB	quinol oxidase subunit 1
BSU36840	[C] Energy production and conversion	atpH	ATP synthase subunit delta																					BSU38190	[G] Carbohydrate transport and metabolism	galT	galactose-1-phosphate uridylyltransferase
BSU36850	[C] Energy production and conversion	atpF	ATP synthase subunit b																					BSU38430	[M] Cell wall/membrane/envelope biogenesis	gspA	general stress protein A
BSU36870	[C] Energy production and conversion	atpB	ATP synthase subunit a																					BSU38810	[G] Carbohydrate transport and metabolism	msmX	maltodextrin import ATP-binding protein MsmX
BSU37770	[E] Amino acid transport and metabolism	rocB	arginine utilization protein RocB																					BSU39050	[P] Inorganic ion transport and metabolism	katE	catalase-2
BSU37780	[C] Energy production and conversion	rocA	1-pyrroline-5-carboxylate dehydrogenase																					BSU39400	[F] Nucleotide transport and metabolism	pdp	pyrimidine-nucleoside phosphorylase
BSU37790	[E] Amino acid transport and metabolism	rocG	catabolic NAD-specific glutamate dehydrogenase RocG																					BSU39410	[F] Nucleotide transport and metabolism	nupC	pyrimidine nucleoside transport protein
BSU38040	[G] Carbohydrate transport and metabolism	sacA	sucrose-6-phosphate hydrolase																					BSU39740	[G] Carbohydrate transport and metabolism	iolC	5-dehydro-2-deoxygluconokinase
BSU38050	[G] Carbohydrate transport and metabolism	sacP	PTS system sucrose-specific EIIBC component																					BSU39760	[C] Energy production and conversion	mmsA	methylmalonate semialdehyde dehydrogenase
BSU38190	[G] Carbohydrate transport and metabolism	galT	galactose-1-phosphate uridylyltransferase																					BSU40060	[G] Carbohydrate transport and metabolism	gntK	gluconokinase
BSU38560	[G] Carbohydrate transport and metabolism	licH	6-phospho-beta-glucosidase																					BSU40070	[G] Carbohydrate transport and metabolism	gntP	gluconate permease
BSU38570	[G] Carbohydrate transport and metabolism	licA	PTS system lichenan transporter subunit IIA																					BSU40330	[E] Amino acid transport and metabolism	rocE	amino acid permease RocE
BSU38810	[G] Carbohydrate transport and metabolism	msmX	maltodextrin import ATP-binding protein MsmX																					BSU40340	[E] Amino acid transport and metabolism	rocD	ornithine aminotransferase
BSU39250	[T] Signal transduction mechanisms	yxiE	universal stress protein YxiE
BSU39260	[G] Carbohydrate transport and metabolism	bglH	aryl-phospho-beta-d-glucosidase BglH
BSU39270	[G] Carbohydrate transport and metabolism	bglP	PTS system beta-glucoside-specific EIIBCA component
BSU39400	[F] Nucleotide transport and metabolism	pdp	pyrimidine-nucleoside phosphorylase
BSU39740	[G] Carbohydrate transport and metabolism	iolC	5-dehydro-2-deoxygluconokinase
BSU40060	[G] Carbohydrate transport and metabolism	gntK	gluconokinase
BSU40070	[G] Carbohydrate transport and metabolism	gntP	gluconate permease
BSU40330	[E] Amino acid transport and metabolism	rocE	amino acid permease RocE
BSU40340	[E] Amino acid transport and metabolism	rocD	ornithine aminotransferase
BSU40490	[M] Cell wall/membrane/envelope biogenesis	yycA	mannosyltransferase YycA

## Sheet: 10_LB_COGcat
The genes with significant changes in gene expression (see sheet4) are categorized into Clusters of Orthologous Groups (COGs) for functional analysis. The strains were grown on LB without glucose
Take all significant genes (strains were grown in LB without glucose) -> copy locus tags to this website: http://genome2d.molgenrug.nl/index.php/dna-microarrays/functional-analysis -> Bsu 168 -> COG categories (COGcat)->
COG category (Cluster of Orthologous Groups)				DELTAccpA _ UP	DELTAccpA _DOWN	M17R _UP	M17R _ DOWN	T62H_UP	T62H _ DOWN	R304W _UP	R304W _ DOWN
[C] Energy production and conversion				9	3	9	3	1	18	15	3	[C]
[D] Cell cycle control, cell division, chromosome partitioning				0	1	1	0	0	0	0	0	[D]
[E] Amino acid transport and metabolism				3	2	3	0	1	1	9	3	[E]
[F] Nucleotide transport and metabolism				1	1	1	0	1	5	1	1	[F]
[G] Carbohydrate transport and metabolism				7	14	5	10	0	28	26	9	[G]
[H] Coenzyme transport and metabolism				1	0	3	0	0	1	1	1	[H]
[I] Lipid transport and metabolism				1	0	0	0	0	1	3	0	[I]
[J] Translation, ribosomal structure and biogenesis				1	0	5	0	0	1	1	1	[J]
[K] Transcription				5	3	1	6	1	7	7	2	[K]
[L] Replication, recombination and repair				0	0	0	0	0	0	0	0	[L]
[M] Cell wall/membrane/envelope biogenesis				1	3	1	1	0	4	1	1	[M]
[O] Posttranslational modification, protein turnover, chaperones				2	0	0	0	0	2	0	0	[O]
[P] Inorganic ion transport and metabolism				1	0	1	3	0	1	1	0	[P]
[Q] Secondary metabolites biosynthesis, transport and catabolism				3	0	1	0	1	1	2	1	[Q]
[R] General function prediction only				1	2	1	0	0	7	5	2	[R]
[S] Function unknown				2	1	0	0	1	2	5	3	[S]
[T] Signal transduction mechanisms				1	0	0	0	0	7	6	1	[T]
[U] Intracellular trafficking, secretion, and vesicular transport				0	0	0	0	0	0	0	0	[U]
[V] Defense mechanisms				0	1	0	0	0	1	0	0	[V]
[X] No prediction				0	0	0	0	0	0	0	0	[X]
			SUM ->	39	31	32	23	6	87	83	28
DELTAccpA _ UP	COG category	gene	product	DELTAccpA_DOWN	COG category	gene	product	M17R_UP	COG category	gene	product	M17R_ DOWN	COG category	gene	product	T62H_UP	COG category	gene	product	T62H_ DOWN	COG category	gene	product	R304W_UP	COG category	gene	product	R304W_ DOWN	COG category	gene	product
BSU00490	[M] Cell wall/membrane/envelope biogenesis	spoVG	septation protein SpoVG	BSU00270	[E] Amino acid transport and metabolism	yaaO	hypothetical protein	BSU00110	[H] Coenzyme transport and metabolism	yaaD	pyridoxal biosynthesis lyase PdxS	BSU00100	[M] Cell wall/membrane/envelope biogenesis	dacA	D-alanyl-D-alanine carboxypeptidase DacA	BSU03050	[C] Energy production and conversion	ldh	L-lactate dehydrogenase	BSU01220	[J] Translation, ribosomal structure and biogenesis	rpsC	30S ribosomal protein S3	BSU02130	[C] Energy production and conversion	glpQ	glycerophosphoryl diester phosphodiesterase	BSU01530	[M] Cell wall/membrane/envelope biogenesis	cwlD	germination-specific N-acetylmuramoyl-L-alanine amidase
BSU03050	[C] Energy production and conversion	ldh	L-lactate dehydrogenase	BSU07800	[G] Carbohydrate transport and metabolism	treP	PTS system trehalose-specific EIIBC component	BSU01200	[J] Translation, ribosomal structure and biogenesis	rpsS	30S ribosomal protein S19	BSU00260	[P] Inorganic ion transport and metabolism	yaaN	hypothetical protein	BSU06470	[F] Nucleotide transport and metabolism	purQ	phosphoribosylformylglycinamidine synthase	BSU02130	[C] Energy production and conversion	glpQ	glycerophosphoryl diester phosphodiesterase	BSU02140	[G] Carbohydrate transport and metabolism	glpT	glycerol-3-phosphate transporter	BSU03550	[G] Carbohydrate transport and metabolism	ycxC	transporter
BSU03480	[Q] Secondary metabolites biosynthesis, transport and catabolism	srfAA	surfactin synthase subunit 1	BSU07810	[G] Carbohydrate transport and metabolism	treA	trehalose-6-phosphate hydrolase	BSU01280	[J] Translation, ribosomal structure and biogenesis	rplE	50S ribosomal protein L5	BSU01630	[P] Inorganic ion transport and metabolism	feuA	iron-uptake system-binding protein	BSU10180	[S] Function unknown	yhfC	membrane protein	BSU04100	[K] Transcription	kipR	IclR family transcriptional regulator	BSU03040	[G] Carbohydrate transport and metabolism	amyE	alpha-amylase	BSU05530	[S] Function unknown	ydfR	hypothetical protein
BSU03490	[Q] Secondary metabolites biosynthesis, transport and catabolism	srfAB	surfactin synthase subunit 2	BSU08610	[S] Function unknown	yfhO	hypothetical protein	BSU01310	[J] Translation, ribosomal structure and biogenesis	rplF	50S ribosomal protein L6	BSU02130	[C] Energy production and conversion	glpQ	glycerophosphoryl diester phosphodiesterase	BSU18460	[K] Transcription	gltC	LysR family transcriptional regulator	BSU04220	[R] General function prediction only	ydaG	general stress protein 26	BSU03460	[G] Carbohydrate transport and metabolism	hxlA	3-hexulose-6-phosphate synthase	BSU06170	[G] Carbohydrate transport and metabolism	ydjE	sugar kinase YdjE
BSU03510	[Q] Secondary metabolites biosynthesis, transport and catabolism	srfAC	surfactin synthase subunit 3	BSU09300	[C] Energy production and conversion	glpD	aerobic glycerol-3-phosphate dehydrogenase	BSU01420	[J] Translation, ribosomal structure and biogenesis	rpsK	30S ribosomal protein S11	BSU05390	[K] Transcription	ydfF	ArsR family transcriptional regulator	BSU28300	[E] Amino acid transport and metabolism	ilvH	acetolactate synthase small subunit	BSU04470	[C] Energy production and conversion	dctP	C4-dicarboxylate transport protein	BSU03990	[G] Carbohydrate transport and metabolism	mtlD	mannitol-1-phosphate 5-dehydrogenase	BSU06660	[R] General function prediction only	opuE	osmoregulated proline transporter
BSU03981	[G] Carbohydrate transport and metabolism	mtlA	PTS system mannitol-specific EIICB component	BSU12000	[K] Transcription	manR	transcriptional regulator ManR	BSU03050	[C] Energy production and conversion	ldh	L-lactate dehydrogenase	BSU09100	[K] Transcription	cspB	cold shock protein CspB	BSU35360	[N] Cell motility	hag	flagellin	BSU04710	[T] Signal transduction mechanisms	rsbV	anti-sigma-B factor antagonist	BSU04000	[C] Energy production and conversion	ycsA	tartrate dehydrogenase/decarboxylase	BSU07010	[T] Signal transduction mechanisms	yesS	AraC family transcriptional regulator
BSU03990	[G] Carbohydrate transport and metabolism	mtlD	mannitol-1-phosphate 5-dehydrogenase	BSU12010	[G] Carbohydrate transport and metabolism	manP	PTS system mannose-specific EIIBCA component	BSU03480	[Q] Secondary metabolites biosynthesis, transport and catabolism	srfAA	surfactin synthase subunit 1	BSU09270	[K] Transcription	glpP	glycerol uptake operon antiterminator regulatory protein	BSU36000	[Q] Secondary metabolites biosynthesis, transport and catabolism	alsD	alpha-acetolactate decarboxylase	BSU04720	[T] Signal transduction mechanisms	rsbW	serine-protein kinase RsbW	BSU04160	[K] Transcription	mtlR	transcriptional regulator MtlR	BSU07190	[S] Function unknown	yezD	hypothetical protein
BSU04470	[C] Energy production and conversion	dctP	C4-dicarboxylate transport protein	BSU12020	[G] Carbohydrate transport and metabolism	manA	mannose-6-phosphate isomerase ManA	BSU03981	[G] Carbohydrate transport and metabolism	mtlA	PTS system mannitol-specific EIICB component	BSU09290	[C] Energy production and conversion	glpK	glycerol kinase					BSU04740	[T] Signal transduction mechanisms	rsbX	phosphoserine phosphatase RsbX	BSU04440	[G] Carbohydrate transport and metabolism	dctB	C4-dicarboxylate-binding protein DctB	BSU08480	[C] Energy production and conversion	yfhC	NAD(P)H nitroreductase YfhC
BSU05130	[K] Transcription	ydeB	transcription factor YdeB	BSU12990	[M] Cell wall/membrane/envelope biogenesis	ykfC	gamma-D-glutamyl-l-lysine endopeptidase	BSU06560	[F] Nucleotide transport and metabolism	yerA	adenine deaminase YerA	BSU09300	[C] Energy production and conversion	glpD	aerobic glycerol-3-phosphate dehydrogenase					BSU06560	[F] Nucleotide transport and metabolism	yerA	adenine deaminase YerA	BSU04460	[T] Signal transduction mechanisms	dctR	C4-dicarboxylate response regulator DctR	BSU09010	[G] Carbohydrate transport and metabolism	yhcA	MFS transporter
BSU06560	[F] Nucleotide transport and metabolism	yerA	adenine deaminase YerA	BSU15470	[F] Nucleotide transport and metabolism	pyrR	bifunctional protein PyrR	BSU07940	[M] Cell wall/membrane/envelope biogenesis	yfkC	MscS family protein YfkC	BSU12000	[K] Transcription	manR	transcriptional regulator ManR					BSU07700	[G] Carbohydrate transport and metabolism	nagP	PTS system N-acetylglucosamine-specific EIICB component	BSU06560	[F] Nucleotide transport and metabolism	yerA	adenine deaminase YerA	BSU09020	[R] General function prediction only	yhcB	hypothetical protein
BSU06580	[S] Function unknown	yerC	hypothetical protein	BSU16950	[V] Defense mechanisms	pbpX	penicillin-binding protein PbpX	BSU10900	[R] General function prediction only	yisY	AB hydrolase superfamily protein YisY	BSU12010	[G] Carbohydrate transport and metabolism	manP	PTS system mannose-specific EIIBCA component					BSU07800	[G] Carbohydrate transport and metabolism	treP	PTS system trehalose-specific EIIBC component	BSU06940	[S] Function unknown	yesL	hypothetical protein	BSU10450	[E] Amino acid transport and metabolism	yhjB	symporter
BSU10130	[H] Coenzyme transport and metabolism	hemH	ferrochelatase	BSU22500	[R] General function prediction only	ypjD	hypothetical protein	BSU11460	[P] Inorganic ion transport and metabolism	oppD	oligopeptide transport ATP-binding protein OppD	BSU12020	[G] Carbohydrate transport and metabolism	manA	mannose-6-phosphate isomerase ManA					BSU07810	[G] Carbohydrate transport and metabolism	treA	trehalose-6-phosphate hydrolase	BSU06950	[T] Signal transduction mechanisms	yesM	sensor histidine kinase	BSU11010	[E] Amino acid transport and metabolism	yitJ	bifunctional homocysteine S-methyltransferase/5,10-methylenetetrahydrofolate reductase
BSU11430	[E] Amino acid transport and metabolism	oppA	oligopeptide ABC transporter binding lipoprotein	BSU23580	[E] Amino acid transport and metabolism	ansA	L-asparaginase 1	BSU14600	[C] Energy production and conversion	pdhC	dihydrolipoyllysine-residue acetyltransferase component of pyruvate dehydrogenase complex	BSU24980	[P] Inorganic ion transport and metabolism	pstC	ABC transporter permease					BSU07820	[K] Transcription	treR	trehalose operon transcriptional repressor	BSU06960	[T] Signal transduction mechanisms	yesN	transcriptional regulator	BSU12000	[K] Transcription	manR	transcriptional regulator ManR
BSU13340	[K] Transcription	ykoM	MarR family transcriptional regulator	BSU25680	[R] General function prediction only	yqeG	hypothetical protein	BSU15110	[H] Coenzyme transport and metabolism	ylbQ	2-dehydropantoate 2-reductase	BSU30260	[K] Transcription	msmR	LacI family transcriptional regulator					BSU07940	[M] Cell wall/membrane/envelope biogenesis	yfkC	MscS family protein YfkC	BSU07560	[G] Carbohydrate transport and metabolism	pel	pectate lyase	BSU12010	[G] Carbohydrate transport and metabolism	manP	PTS system mannose-specific EIIBCA component
BSU14870	[O] Posttranslational modification, protein turnover, chaperones	ctaA	heme A synthase	BSU29470	[C] Energy production and conversion	ackA	acetate kinase	BSU16090	[C] Energy production and conversion	sucC	succinyl-CoA ligase [ADP-forming] subunit beta	BSU35910	[K] Transcription	rbsR	ribose operon repressor					BSU08060	[C] Energy production and conversion	acoA	acetoin:2,6-dichlorophenolindophenol oxidoreductase subunit alpha	BSU07610	[C] Energy production and conversion	citM	Mg(2+)/citrate complex secondary transporter	BSU12020	[G] Carbohydrate transport and metabolism	manA	mannose-6-phosphate isomerase ManA
BSU15900	[I] Lipid transport and metabolism	fabD	malonyl CoA-acyl carrier protein transacylase	BSU29740	[K] Transcription	ccpA	catabolite control protein A	BSU16310	[N] Cell motility	fliM	flagellar motor switch protein FliM	BSU35920	[G] Carbohydrate transport and metabolism	rbsK	ribokinase					BSU08100	[K] Transcription	acoR	acetoin dehydrogenase operon transcriptional activator AcoR	BSU08100	[K] Transcription	acoR	acetoin dehydrogenase operon transcriptional activator AcoR	BSU12100	[G] Carbohydrate transport and metabolism	yjeA	hypothetical protein
BSU16100	[C] Energy production and conversion	sucD	succinyl-CoA ligase [ADP-forming] subunit alpha	BSU30260	[K] Transcription	msmR	LacI family transcriptional regulator	BSU18000	[C] Energy production and conversion	citB	aconitate hydratase	BSU35930	[G] Carbohydrate transport and metabolism	rbsD	D-ribose pyranase					BSU09280	[G] Carbohydrate transport and metabolism	glpF	glycerol uptake facilitator protein	BSU08270	[G] Carbohydrate transport and metabolism	yfiH	hypothetical protein	BSU15320	[K] Transcription	sigE	RNA polymerase sigma-E factor
BSU16980	[S] Function unknown	spoVS	stage V sporulation protein S	BSU30270	[G] Carbohydrate transport and metabolism	msmE	sugar ABC transporter substrate-binding protein	BSU25270	[J] Translation, ribosomal structure and biogenesis	glyQ	glycine--tRNA ligase alpha subunit	BSU35940	[G] Carbohydrate transport and metabolism	rbsA	ribose import ATP-binding protein RbsA					BSU09290	[C] Energy production and conversion	glpK	glycerol kinase	BSU09830	[R] General function prediction only	yhaX	hydrolase	BSU19550	[C] Energy production and conversion	yodC	NAD(P)H nitroreductase
BSU16990	[R] General function prediction only	tdh	L-threonine 3-dehydrogenase	BSU31580	[C] Energy production and conversion	maeN	Na(+)-malate symporter	BSU28150	[H] Coenzyme transport and metabolism	hemC	porphobilinogen deaminase	BSU35960	[G] Carbohydrate transport and metabolism	rbsB	D-ribose-binding protein					BSU09300	[C] Energy production and conversion	glpD	aerobic glycerol-3-phosphate dehydrogenase	BSU10170	[I] Lipid transport and metabolism	fabHB	3-oxoacyl-[acyl-carrier-protein] synthase 3 protein 2	BSU26200	[S] Function unknown	yqaS	hypothetical protein
BSU18000	[C] Energy production and conversion	citB	aconitate hydratase	BSU35260	[D] Cell cycle control, cell division, chromosome partitioning	ftsE	cell division ATP-binding protein FtsE	BSU29120	[C] Energy production and conversion	mdh	malate dehydrogenase	BSU38560	[G] Carbohydrate transport and metabolism	licH	6-phospho-beta-glucosidase					BSU09690	[T] Signal transduction mechanisms	nhaX	stress response protein NhaX	BSU10390	[E] Amino acid transport and metabolism	yhfW	rieske 2Fe-2S iron-sulfur protein YhfW	BSU28270	[E] Amino acid transport and metabolism	leuB	3-isopropylmalate dehydrogenase
BSU18010	[C] Energy production and conversion	yneN	thioredoxin	BSU36760	[M] Cell wall/membrane/envelope biogenesis	murAA	UDP-N-acetylglucosamine 1-carboxyvinyltransferase 1	BSU29130	[C] Energy production and conversion	icd	isocitrate dehydrogenase	BSU38570	[G] Carbohydrate transport and metabolism	licA	PTS system lichenan transporter subunit IIA					BSU10900	[R] General function prediction only	yisY	AB hydrolase superfamily protein YisY	BSU10750	[Q] Secondary metabolites biosynthesis, transport and catabolism	yisK	hypothetical protein	BSU30320	[J] Translation, ribosomal structure and biogenesis	leuS	leucine--tRNA ligase
BSU22560	[C] Energy production and conversion	qcrA	menaquinol-cytochrome c reductase iron-sulfur subunit	BSU38560	[G] Carbohydrate transport and metabolism	licH	6-phospho-beta-glucosidase	BSU29140	[C] Energy production and conversion	citZ	citrate synthase 2	BSU40110	[G] Carbohydrate transport and metabolism	bglA	aryl-phospho-beta-d-glucosidase BglA					BSU12020	[G] Carbohydrate transport and metabolism	manA	mannose-6-phosphate isomerase ManA	BSU12580	[R] General function prediction only	xtmB	PBSX phage terminase large subunit	BSU31580	[C] Energy production and conversion	maeN	Na(+)-malate symporter
BSU23150	[O] Posttranslational modification, protein turnover, chaperones	resA	thiol-disulfide oxidoreductase ResA	BSU38570	[G] Carbohydrate transport and metabolism	licA	PTS system lichenan transporter subunit IIA	BSU31350	[G] Carbohydrate transport and metabolism	pgi	glucose-6-phosphate isomerase	BSU40120	[G] Carbohydrate transport and metabolism	yyzE	PTS system transporter subunit IIA YyzE					BSU13340	[K] Transcription	ykoM	MarR family transcriptional regulator	BSU12680	[R] General function prediction only	xkdO	phage-like element PBSX protein XkdO	BSU32180	[F] Nucleotide transport and metabolism	yutK	transporter
BSU24990	[P] Inorganic ion transport and metabolism	pstS	phosphate-binding protein PstS	BSU38580	[G] Carbohydrate transport and metabolism	licC	PTS system lichenan transporter subunit IIC	BSU33910	[G] Carbohydrate transport and metabolism	pgm	2,3-bisphosphoglycerate-independent phosphoglycerate mutase									BSU14140	[K] Transcription	ccpC	LysR family transcriptional regulator	BSU12730	[S] Function unknown	xkdT	phage-like element PBSX protein XkdT	BSU36000	[Q] Secondary metabolites biosynthesis, transport and catabolism	alsD	alpha-acetolactate decarboxylase
BSU25190	[C] Energy production and conversion	cccA	cytochrome c-550	BSU38590	[G] Carbohydrate transport and metabolism	licB	PTS system lichenan transporter subunit IIB	BSU33920	[G] Carbohydrate transport and metabolism	tpiA	triosephosphate isomerase									BSU15470	[F] Nucleotide transport and metabolism	pyrR	bifunctional protein PyrR	BSU13340	[K] Transcription	ykoM	MarR family transcriptional regulator	BSU36010	[H] Coenzyme transport and metabolism	alsS	acetolactate synthase
BSU29110	[K] Transcription	phoP	alkaline phosphatase synthesis transcriptional regulatory protein PhoP	BSU39230	[M] Cell wall/membrane/envelope biogenesis	wapA	wall-associated protein	BSU33930	[G] Carbohydrate transport and metabolism	pgk	phosphoglycerate kinase									BSU16090	[C] Energy production and conversion	sucC	succinyl-CoA ligase [ADP-forming] subunit beta	BSU14140	[K] Transcription	ccpC	LysR family transcriptional regulator	BSU40080	[G] Carbohydrate transport and metabolism	gntZ	6-phosphogluconate dehydrogenase
BSU33950	[K] Transcription	cggR	central glycolytic genes regulator	BSU39260	[G] Carbohydrate transport and metabolism	bglH	aryl-phospho-beta-d-glucosidase BglH	BSU33950	[K] Transcription	cggR	central glycolytic genes regulator									BSU16100	[C] Energy production and conversion	sucD	succinyl-CoA ligase [ADP-forming] subunit alpha	BSU14150	[C] Energy production and conversion	ykuN	flavodoxin	BSU40110	[G] Carbohydrate transport and metabolism	bglA	aryl-phospho-beta-d-glucosidase BglA
BSU35310	[J] Translation, ribosomal structure and biogenesis	yvyD	sigma-54 modulation protein	BSU39270	[G] Carbohydrate transport and metabolism	bglP	PTS system beta-glucoside-specific EIIBCA component	BSU34050	[C] Energy production and conversion	yvfV	lactate utilization protein A									BSU18510	[R] General function prediction only	yoxC	hypothetical protein	BSU14900	[C] Energy production and conversion	ctaD	cytochrome c oxidase subunit 1	BSU40120	[G] Carbohydrate transport and metabolism	yyzE	PTS system transporter subunit IIA YyzE
BSU35910	[K] Transcription	rbsR	ribose operon repressor	BSU40060	[G] Carbohydrate transport and metabolism	gntK	gluconokinase	BSU35150	[N] Cell motility	yvzB	flagellin									BSU19360	[C] Energy production and conversion	odhB	dihydrolipoyllysine-residue succinyltransferase component of 2-oxoglutarate dehydrogenase complex	BSU16100	[C] Energy production and conversion	sucD	succinyl-CoA ligase [ADP-forming] subunit alpha
BSU35920	[G] Carbohydrate transport and metabolism	rbsK	ribokinase	BSU40110	[G] Carbohydrate transport and metabolism	bglA	aryl-phospho-beta-d-glucosidase BglA	BSU35630	[D] Cell cycle control, cell division, chromosome partitioning	lytB	amidase enhancer									BSU21440	[O] Posttranslational modification, protein turnover, chaperones	bdbB	disulfide bond formation protein B	BSU16990	[R] General function prediction only	tdh	L-threonine 3-dehydrogenase
BSU35930	[G] Carbohydrate transport and metabolism	rbsD	D-ribose pyranase	BSU40120	[G] Carbohydrate transport and metabolism	yyzE	PTS system transporter subunit IIA YyzE	BSU37780	[C] Energy production and conversion	rocA	1-pyrroline-5-carboxylate dehydrogenase									BSU21450	[M] Cell wall/membrane/envelope biogenesis	yolJ	glycosyltransferase SunS	BSU17000	[H] Coenzyme transport and metabolism	kbl	2-amino-3-ketobutyrate CoA ligase
BSU35940	[G] Carbohydrate transport and metabolism	rbsA	ribose import ATP-binding protein RbsA					BSU37790	[E] Amino acid transport and metabolism	rocG	catabolic NAD-specific glutamate dehydrogenase RocG									BSU21460	[O] Posttranslational modification, protein turnover, chaperones	bdbA	disulfide bond formation protein A	BSU18000	[C] Energy production and conversion	citB	aconitate hydratase
BSU35950	[G] Carbohydrate transport and metabolism	rbsC	ribose transport system permease RbsC					BSU40330	[E] Amino acid transport and metabolism	rocE	amino acid permease RocE									BSU21470	[V] Defense mechanisms	sunT	sublancin-168-processing and transport ATP-binding protein SunT	BSU18010	[C] Energy production and conversion	yneN	thioredoxin
BSU35960	[G] Carbohydrate transport and metabolism	rbsB	D-ribose-binding protein					BSU40340	[E] Amino acid transport and metabolism	rocD	ornithine aminotransferase									BSU22730	[F] Nucleotide transport and metabolism	ndk	nucleoside diphosphate kinase	BSU22100	[G] Carbohydrate transport and metabolism	kdgA	KHG/KDPG aldolase
BSU35970	[T] Signal transduction mechanisms	ywsB	cell wall-binding protein YwsB																	BSU23550	[C] Energy production and conversion	mleA	NAD-dependent malic enzyme 1	BSU22110	[G] Carbohydrate transport and metabolism	kdgK	2-dehydro-3-deoxygluconokinase
BSU37780	[C] Energy production and conversion	rocA	1-pyrroline-5-carboxylate dehydrogenase																	BSU23560	[C] Energy production and conversion	mleN	malate-2H(+)/Na(+)-lactate antiporter	BSU22540	[C] Energy production and conversion	qcrC	menaquinol-cytochrome c reductase cytochrome b/c subunit
BSU37790	[E] Amino acid transport and metabolism	rocG	catabolic NAD-specific glutamate dehydrogenase RocG																	BSU23580	[E] Amino acid transport and metabolism	ansA	L-asparaginase 1	BSU22550	[C] Energy production and conversion	qcrB	menaquinol-cytochrome c reductase cytochrome b subunit
BSU38760	[C] Energy production and conversion	cydA	cytochrome d ubiquinol oxidase subunit 1																	BSU24750	[R] General function prediction only	yqhB	hypothetical protein	BSU22560	[C] Energy production and conversion	qcrA	menaquinol-cytochrome c reductase iron-sulfur subunit
BSU40340	[E] Amino acid transport and metabolism	rocD	ornithine aminotransferase																	BSU25190	[C] Energy production and conversion	cccA	cytochrome c-550	BSU25190	[C] Energy production and conversion	cccA	cytochrome c-550
																				BSU27770	[R] General function prediction only	yrbE	oxidoreductase	BSU25800	[E] Amino acid transport and metabolism	yqcK	hypothetical protein
																				BSU28430	[C] Energy production and conversion	sdhB	succinate dehydrogenase iron-sulfur subunit	BSU26860	[C] Energy production and conversion	yraO	transporter
																				BSU28440	[C] Energy production and conversion	sdhA	succinate dehydrogenase flavoprotein subunit	BSU27100	[E] Amino acid transport and metabolism	yrhP	membrane protein
																				BSU28520	[C] Energy production and conversion	etfA	electron transfer flavoprotein subunit alpha	BSU27760	[P] Inorganic ion transport and metabolism	csbX	alpha-ketoglutarate permease
																				BSU28530	[C] Energy production and conversion	etfB	electron transfer flavoprotein subunit beta	BSU27770	[R] General function prediction only	yrbE	oxidoreductase
																				BSU28770	[G] Carbohydrate transport and metabolism	araL	arabinose operon protein AraL	BSU28510	[G] Carbohydrate transport and metabolism	xsa	alpha-L-arabinofuranosidase
																				BSU28900	[M] Cell wall/membrane/envelope biogenesis	ysbB	antiholin-like protein LrgB	BSU28560	[I] Lipid transport and metabolism	lcfA	long-chain-fatty-acid--CoA ligase
																				BSU28910	[R] General function prediction only	ysbA	antiholin-like protein LrgA	BSU28710	[T] Signal transduction mechanisms	cstA	carbon starvation protein A homolog
																				BSU29140	[C] Energy production and conversion	citZ	citrate synthase 2	BSU28720	[G] Carbohydrate transport and metabolism	abfA	alpha-L-arabinofuranosidase
																				BSU29700	[T] Signal transduction mechanisms	acuB	acetoin utilization protein AcuB	BSU28770	[G] Carbohydrate transport and metabolism	araL	arabinose operon protein AraL
																				BSU29710	[Q] Secondary metabolites biosynthesis, transport and catabolism	acuC	acetoin utilization protein AcuC	BSU28780	[G] Carbohydrate transport and metabolism	araD	L-ribulose-5-phosphate 4-epimerase
																				BSU30260	[K] Transcription	msmR	LacI family transcriptional regulator	BSU28790	[C] Energy production and conversion	araB	ribulokinase
																				BSU30300	[G] Carbohydrate transport and metabolism	melA	alpha-galactosidase	BSU29110	[K] Transcription	phoP	alkaline phosphatase synthesis transcriptional regulatory protein PhoP
																				BSU31580	[C] Energy production and conversion	maeN	Na(+)-malate symporter	BSU29400	[K] Transcription	ytlI	LysR family transcriptional regulator
																				BSU34500	[P] Inorganic ion transport and metabolism	yvdR	membrane protein	BSU29680	[I] Lipid transport and metabolism	acsA	acetyl-coenzyme A synthetase
																				BSU35180	[S] Function unknown	csbA	general stress protein CsbA	BSU29700	[T] Signal transduction mechanisms	acuB	acetoin utilization protein AcuB
																				BSU35910	[K] Transcription	rbsR	ribose operon repressor	BSU29710	[Q] Secondary metabolites biosynthesis, transport and catabolism	acuC	acetoin utilization protein AcuC
																				BSU35920	[G] Carbohydrate transport and metabolism	rbsK	ribokinase	BSU30170	[G] Carbohydrate transport and metabolism	ytcP	ABC transporter permease
																				BSU35930	[G] Carbohydrate transport and metabolism	rbsD	D-ribose pyranase	BSU31190	[S] Function unknown	yulD	L-rhamnose mutarotase
																				BSU35940	[G] Carbohydrate transport and metabolism	rbsA	ribose import ATP-binding protein RbsA	BSU31945	[S] Function unknown	yukJ	hypothetical protein
																				BSU35950	[G] Carbohydrate transport and metabolism	rbsC	ribose transport system permease RbsC	BSU34560	[G] Carbohydrate transport and metabolism	malL	oligo-1,6-glucosidase 1
																				BSU35960	[G] Carbohydrate transport and metabolism	rbsB	D-ribose-binding protein	BSU34580	[S] Function unknown	yvdJ	maltodextrin utilization protein YvdJ
																				BSU35970	[T] Signal transduction mechanisms	ywsB	cell wall-binding protein YwsB	BSU35910	[K] Transcription	rbsR	ribose operon repressor
																				BSU37220	[H] Coenzyme transport and metabolism	ywjB	hypothetical protein	BSU35930	[G] Carbohydrate transport and metabolism	rbsD	D-ribose pyranase
																				BSU37240	[I] Lipid transport and metabolism	ywiE	cardiolipin synthase YwiE	BSU35940	[G] Carbohydrate transport and metabolism	rbsA	ribose import ATP-binding protein RbsA
																				BSU37780	[C] Energy production and conversion	rocA	1-pyrroline-5-carboxylate dehydrogenase	BSU35950	[G] Carbohydrate transport and metabolism	rbsC	ribose transport system permease RbsC
																				BSU38040	[G] Carbohydrate transport and metabolism	sacA	sucrose-6-phosphate hydrolase	BSU35960	[G] Carbohydrate transport and metabolism	rbsB	D-ribose-binding protein
																				BSU38050	[G] Carbohydrate transport and metabolism	sacP	PTS system sucrose-specific EIIBC component	BSU35970	[T] Signal transduction mechanisms	ywsB	cell wall-binding protein YwsB
																				BSU38190	[G] Carbohydrate transport and metabolism	galT	galactose-1-phosphate uridylyltransferase	BSU37760	[E] Amino acid transport and metabolism	rocC	amino acid permease RocC
																				BSU38430	[M] Cell wall/membrane/envelope biogenesis	gspA	general stress protein A	BSU37770	[E] Amino acid transport and metabolism	rocB	arginine utilization protein RocB
																				BSU38560	[G] Carbohydrate transport and metabolism	licH	6-phospho-beta-glucosidase	BSU37780	[C] Energy production and conversion	rocA	1-pyrroline-5-carboxylate dehydrogenase
																				BSU38570	[G] Carbohydrate transport and metabolism	licA	PTS system lichenan transporter subunit IIA	BSU37790	[E] Amino acid transport and metabolism	rocG	catabolic NAD-specific glutamate dehydrogenase RocG
																				BSU38580	[G] Carbohydrate transport and metabolism	licC	PTS system lichenan transporter subunit IIC	BSU38040	[G] Carbohydrate transport and metabolism	sacA	sucrose-6-phosphate hydrolase
																				BSU38590	[G] Carbohydrate transport and metabolism	licB	PTS system lichenan transporter subunit IIB	BSU38050	[G] Carbohydrate transport and metabolism	sacP	PTS system sucrose-specific EIIBC component
																				BSU38810	[G] Carbohydrate transport and metabolism	msmX	maltodextrin import ATP-binding protein MsmX	BSU38460	[J] Translation, ribosomal structure and biogenesis	tyrZ	tyrosine--tRNA ligase 2
																				BSU39250	[T] Signal transduction mechanisms	yxiE	universal stress protein YxiE	BSU38810	[G] Carbohydrate transport and metabolism	msmX	maltodextrin import ATP-binding protein MsmX
																				BSU39260	[G] Carbohydrate transport and metabolism	bglH	aryl-phospho-beta-d-glucosidase BglH	BSU39000	[G] Carbohydrate transport and metabolism	yxjC	transporter
																				BSU39270	[G] Carbohydrate transport and metabolism	bglP	PTS system beta-glucoside-specific EIIBCA component	BSU39350	[E] Amino acid transport and metabolism	hutH	histidine ammonia-lyase
																				BSU39400	[F] Nucleotide transport and metabolism	pdp	pyrimidine-nucleoside phosphorylase	BSU39540	[M] Cell wall/membrane/envelope biogenesis	yxeI	hypothetical protein
																				BSU39410	[F] Nucleotide transport and metabolism	nupC	pyrimidine nucleoside transport protein	BSU39680	[G] Carbohydrate transport and metabolism	iolI	inosose isomerase
																				BSU39810	[G] Carbohydrate transport and metabolism	csbC	metabolite transport protein CsbC	BSU39690	[G] Carbohydrate transport and metabolism	iolH	myo-inositol catabolism protein IolH
																				BSU39960	[S] Function unknown	yxaI	hypothetical protein	BSU39740	[G] Carbohydrate transport and metabolism	iolC	5-dehydro-2-deoxygluconokinase
																				BSU40000	[R] General function prediction only	yxnA	oxidoreductase	BSU40330	[E] Amino acid transport and metabolism	rocE	amino acid permease RocE
																				BSU40060	[G] Carbohydrate transport and metabolism	gntK	gluconokinase	BSU40340	[E] Amino acid transport and metabolism	rocD	ornithine aminotransferase
																				BSU40070	[G] Carbohydrate transport and metabolism	gntP	gluconate permease
																				BSU40080	[G] Carbohydrate transport and metabolism	gntZ	6-phosphogluconate dehydrogenase
																				BSU40110	[G] Carbohydrate transport and metabolism	bglA	aryl-phospho-beta-d-glucosidase BglA
																				BSU40120	[G] Carbohydrate transport and metabolism	yyzE	PTS system transporter subunit IIA YyzE

[truncated: 2 more sheets: 11_CcpA_regulon, 12_growth curves]
